# Supplementary material for: TrkB Signaling Influences Gene Expression in Cortistatin-Expressing Interneurons
Source: eNeuro. 2020 Feb 6;7(1):ENEURO.0310-19.2019. doi: 10.1523/ENEURO.0310-19.2019 (PMC7031852; doi:10.1523/ENEURO.0310-19.2019)
Supplement: Figure 1-2 — Gene ontology analysis of differentially expressed genes between CortCre and CortCre;TrkBflox/flox bulk cortex. Columns represent Cluster (label for set of differentially expressed genes), ONTOLOGY (gene ontology type: CC, cell compartment; BP, biological process; MF, molecular function), ID (gene ontology ID), Description (gene ontology set description), GeneRatio (fraction of differentially expressed genes were in the GO set), BgRatio (fraction of differentially expressed genes that were not in the GO set), Pvalue (p value resulting from hypergeometric test), p.adjust [Benjamini–Hochberg-adjusted p value (FDR)], qvalue (Storey-adjusted p value), geneID [gene symbols corresponding to the differentially expressed genes in the GO set (i.e., from GeneRatio above)], and Count [number of differentially expressed genes in the GO set (numerator of GeneRatio, to avoid forced Excel conversion to dates from some fraction)]. Download Figure 1-2, CSV file. [file sup_enu-eN-NWR-0310-19-s02.csv]

Cluster	ONTOLOGY	ID	Description	GeneRatio	BgRatio	pvalue	p.adjust	qvalue	geneID	Count
CST<WT	CC	GO:0097060	synaptic membrane	20/129	471/14212	8.56396185028342e-09	2.32083366142681e-06	1.8299834269553e-06	Atp2b4/Cacna1e/Chrna4/Grik3/Met/Cntnap2/Grin2b/Prkcg/Shisa7/Ntrk3/Grm5/Gsg1l/Glra3/Psd3/Arhgap32/Ank3/Syt1/Chrm3/Htr1a/Faim2	20
WT<CST	CC	GO:0062023	collagen-containing extracellular matrix	15/134	266/14212	3.05669267842437e-08	7.06096008716029e-06	6.72472389253361e-06	Col9a3/Ecm1/Col27a1/Vwa1/Serpine1/Ache/Ptn/Anxa4/Adamts8/Serpinf1/Papln/Colq/Col11a2/Kazald1/Srpx2	15
CST<WT	CC	GO:0045211	postsynaptic membrane	15/129	345/14212	5.40113921532387e-07	7.31854363676385e-05	5.77069084584603e-05	Cacna1e/Chrna4/Grik3/Met/Grin2b/Shisa7/Ntrk3/Grm5/Gsg1l/Glra3/Psd3/Arhgap32/Ank3/Chrm3/Faim2	15
CST<WT	CC	GO:0099572	postsynaptic specialization	16/129	412/14212	9.91358651856179e-07	8.95527315510081e-05	7.06125636234401e-05	Hnrnpa3/Chrna4/Pclo/Met/Grin2b/Prkcg/Shisa7/Grm5/Gsg1l/Adgra1/Glra3/Arhgap32/Tanc2/Chrm3/Pcbp2/Mapk1	16
WT<CST	CC	GO:0031012	extracellular matrix	15/134	367/14212	1.91221211491052e-06	0.000220860499272165	0.000210343332640157	Col9a3/Ecm1/Col27a1/Vwa1/Serpine1/Ache/Ptn/Anxa4/Adamts8/Serpinf1/Papln/Colq/Col11a2/Kazald1/Srpx2	15
CST<WT	CC	GO:0099699	integral component of synaptic membrane	11/129	209/14212	3.12494866580594e-06	0.000211715272108352	0.000166938047147001	Atp2b4/Cacna1e/Chrna4/Grin2b/Shisa7/Ntrk3/Grm5/Gsg1l/Glra3/Chrm3/Htr1a	11
WT<CST	BP	GO:0001525	angiogenesis	16/131	436/13966	3.18312517747843e-06	0.0062421084730352	0.00586030098464187	Scg2/Creb3l1/Ecm1/Ddah1/Serpine1/Ptn/Gpx1/Ramp3/Serpinf1/Tmem100/Sphk1/Plau/Apln/Tnmd/Srpx2/Nox1	16
CST<WT	BP	GO:0050808	synapse organization	15/127	402/13966	3.67011269084326e-06	0.00591471211058119	0.0050449053067901	Adgrb3/Cacnb2/Pclo/Epha5/Sez6l/Grin2b/Shisa7/Igf1r/Ntrk3/Grm5/Glra3/Wasf1/Ank3/Sez6/Htr1a	15
CST<WT	CC	GO:0098984	neuron to neuron synapse	15/129	406/14212	4.08379850170223e-06	0.000221341878792261	0.000174528651756958	Hnrnpa3/Pclo/Met/Grin2b/Prkcg/Shisa7/Grm5/Gsg1l/Adgra1/Arhgap32/Syt1/Tanc2/Chrm3/Pcbp2/Mapk1	15
CST<WT	MF	GO:0030594	neurotransmitter receptor activity	7/123	78/13889	5.64801819981413e-06	0.00200504646093402	0.0017300771538378	Chrna4/Grik3/Grin2b/Grm5/Glra3/Chrm3/Htr1a	7
CST<WT	CC	GO:0099240	intrinsic component of synaptic membrane	11/129	227/14212	6.90342388377057e-06	0.000311804645416971	0.000245858780422005	Atp2b4/Cacna1e/Chrna4/Grin2b/Shisa7/Ntrk3/Grm5/Gsg1l/Glra3/Chrm3/Htr1a	11
CST<WT	BP	GO:0008015	blood circulation	14/127	371/13966	6.96179401719078e-06	0.00591471211058119	0.0050449053067901	Myl1/Atp2b4/Cacna1e/Cd34/Cacnb2/Met/Sgcz/Npy1r/Scn3b/Chrm3/Ryr2/Htr1a/Agtr2/Ar	14
CST<WT	CC	GO:0014069	postsynaptic density	14/129	379/14212	8.75565553229082e-06	0.000324315865477217	0.00025572391024228	Hnrnpa3/Pclo/Met/Grin2b/Prkcg/Shisa7/Grm5/Gsg1l/Adgra1/Arhgap32/Tanc2/Chrm3/Pcbp2/Mapk1	14
CST<WT	BP	GO:0003013	circulatory system process	14/127	379/13966	8.87416861285601e-06	0.00591471211058119	0.0050449053067901	Myl1/Atp2b4/Cacna1e/Cd34/Cacnb2/Met/Sgcz/Npy1r/Scn3b/Chrm3/Ryr2/Htr1a/Agtr2/Ar	14
CST<WT	CC	GO:0032279	asymmetric synapse	14/129	382/14212	9.57390008788832e-06	0.000324315865477217	0.00025572391024228	Hnrnpa3/Pclo/Met/Grin2b/Prkcg/Shisa7/Grm5/Gsg1l/Adgra1/Arhgap32/Tanc2/Chrm3/Pcbp2/Mapk1	14
CST<WT	BP	GO:0001508	action potential	8/127	115/13966	9.82102467510367e-06	0.00591471211058119	0.0050449053067901	Cacnb2/Chrna4/Grin2b/Ntrk3/Scn3b/Ank3/Ryr2/Gnaq	8
WT<CST	BP	GO:0007218	neuropeptide signaling pathway	6/131	55/13966	1.20757971909668e-05	0.0118403191457429	0.0111160890984215	Ecel1/Hcrtr1/Npy/Hcrtr2/Pnoc/Adcyap1	6
CST<WT	CC	GO:0034702	ion channel complex	11/129	241/14212	1.21548058345122e-05	0.000365994709016979	0.000288587787649822	Cacna1e/Nos1ap/Cacnb2/Chrna4/Grik3/Cntnap2/Grin2b/Shisa7/Glra3/Scn3b/Ryr2	11
WT<CST	MF	GO:0030545	receptor regulator activity	12/130	281/13889	1.28343738319923e-05	0.00212735667969308	0.00194219584451625	Scg2/Bdnf/Crlf2/Vgf/Ptn/Npy/Gkn1/Pnoc/Lynx1/Sst/Adcyap1/Apln	12
CST<WT	CC	GO:0099055	integral component of postsynaptic membrane	9/129	158/14212	1.35736038564465e-05	0.000367844664509699	0.000290046482406172	Cacna1e/Chrna4/Grin2b/Shisa7/Ntrk3/Grm5/Gsg1l/Glra3/Chrm3	9
WT<CST	MF	GO:0005201	extracellular matrix structural constituent	8/130	117/13889	1.37692988976899e-05	0.00212735667969308	0.00194219584451625	Col9a3/Ecm1/Col27a1/Vwa1/Papln/Colq/Col11a2/Srpx2	8
CST<WT	BP	GO:0021549	cerebellum development	7/127	87/13966	1.39213113538415e-05	0.00670728781028084	0.00572092626583129	Rere/Sez6l/Foxp2/Igf1r/Sez6/Faim2/Agtr2	7
CST<WT	MF	GO:0004930	G protein-coupled receptor activity	11/123	253/13889	1.50490747096093e-05	0.00267121076095564	0.00230488460026121	Adgrb3/Grik3/Grm5/Adgra1/Npy1r/Gpr83/Nmbr/Gpr68/Chrm3/Htr1a/Agtr2	11
CST<WT	CC	GO:1902495	transmembrane transporter complex	11/129	249/14212	1.64987047463052e-05	0.000406468089658975	0.00032050115440191	Cacna1e/Nos1ap/Cacnb2/Chrna4/Grik3/Cntnap2/Grin2b/Shisa7/Glra3/Scn3b/Ryr2	11
CST<WT	BP	GO:0007626	locomotory behavior	10/127	209/13966	2.07335047887378e-05	0.00761556465372958	0.00649563356888866	Cacna1e/Astn1/Pak7/Chrna4/Sez6l/Chl1/Grm5/Npy1r/Sez6/Vps13a	10
CST<WT	CC	GO:0098936	intrinsic component of postsynaptic membrane	9/129	167/14212	2.11360229833439e-05	0.000445002892461897	0.000350885947445194	Cacna1e/Chrna4/Grin2b/Shisa7/Ntrk3/Grm5/Gsg1l/Glra3/Chrm3	9
CST<WT	CC	GO:1990351	transporter complex	11/129	256/14212	2.13470022214194e-05	0.000445002892461897	0.000350885947445194	Cacna1e/Nos1ap/Cacnb2/Chrna4/Grik3/Cntnap2/Grin2b/Shisa7/Glra3/Scn3b/Ryr2	11
CST<WT	BP	GO:0032412	regulation of ion transmembrane transporter activity	10/127	215/13966	2.64472208331696e-05	0.00761556465372958	0.00649563356888866	Nos1ap/Cacnb2/Chrna4/Shisa7/Grm5/Gsg1l/Scn3b/Ank3/Ryr2/Fhl1	10
CST<WT	BP	GO:0022037	metencephalon development	7/127	96/13966	2.65408060319477e-05	0.00761556465372958	0.00649563356888866	Rere/Sez6l/Foxp2/Igf1r/Sez6/Faim2/Agtr2	7
WT<CST	MF	GO:0048018	receptor ligand activity	11/130	255/13889	2.72838860073785e-05	0.00281024025875998	0.00256564261402717	Scg2/Bdnf/Crlf2/Vgf/Ptn/Npy/Gkn1/Pnoc/Sst/Adcyap1/Apln	11
CST<WT	CC	GO:0030016	myofibril	9/129	173/14212	2.79596894123488e-05	0.00054121970219618	0.000426753154188482	Myl1/Sphkap/Atp2b4/Nos1ap/Chl1/Grin2b/Scn3b/Ank3/Ryr2	9
CST<WT	BP	GO:0042391	regulation of membrane potential	13/127	372/13966	3.377602600648e-05	0.00761556465372958	0.00649563356888866	Cacnb2/Chrna4/Grik3/Met/Grin2b/Ntrk3/Glra3/Scn3b/Ank3/Sez6/Ryr2/Gnaq/Fhl1	13
CST<WT	BP	GO:0060047	heart contraction	9/127	177/13966	3.38496800170208e-05	0.00761556465372958	0.00649563356888866	Myl1/Atp2b4/Cacna1e/Cacnb2/Met/Sgcz/Scn3b/Ryr2/Agtr2	9
CST<WT	BP	GO:0022898	regulation of transmembrane transporter activity	10/127	222/13966	3.47742678252492e-05	0.00761556465372958	0.00649563356888866	Nos1ap/Cacnb2/Chrna4/Shisa7/Grm5/Gsg1l/Scn3b/Ank3/Ryr2/Fhl1	10
CST<WT	CC	GO:0098978	glutamatergic synapse	15/129	489/14212	3.68507662620998e-05	0.000665770510468603	0.000524961793067106	Atp2b4/Nos1ap/Grik3/Pclo/Grin2b/Shisa7/Ntrk3/Grm5/Gsg1l/Adgra1/Glra3/Syt1/Tanc2/Chrm3/Syt4	15
CST<WT	BP	GO:0003015	heart process	9/127	184/13966	4.58663519461679e-05	0.00837986483783833	0.00714753715822701	Myl1/Atp2b4/Cacna1e/Cacnb2/Met/Sgcz/Scn3b/Ryr2/Agtr2	9
CST<WT	CC	GO:0030018	Z disc	7/129	105/14212	4.69246449713438e-05	0.000733957036605357	0.000578727047702029	Sphkap/Atp2b4/Nos1ap/Grin2b/Scn3b/Ank3/Ryr2	7
CST<WT	BP	GO:0050890	cognition	11/127	279/13966	4.75416839079743e-05	0.00837986483783833	0.00714753715822701	Adgrb3/Cacna1e/Pak7/Chrna4/Foxp2/Cntnap2/Chl1/Grin2b/Shisa7/Grm5/Syt4	11
CST<WT	CC	GO:0098797	plasma membrane protein complex	14/129	442/14212	4.81778462877821e-05	0.000733957036605357	0.000578727047702029	Cacna1e/Nos1ap/Fcer1g/Cacnb2/Chrna4/Grik3/Cntnap2/Grin2b/Shisa7/Igf1r/Sgcz/Glra3/Scn3b/Gnaq	14
CST<WT	BP	GO:0032409	regulation of transporter activity	10/127	231/13966	4.86999201866902e-05	0.00837986483783833	0.00714753715822701	Nos1ap/Cacnb2/Chrna4/Shisa7/Grm5/Gsg1l/Scn3b/Ank3/Ryr2/Fhl1	10
CST<WT	CC	GO:0034703	cation channel complex	9/129	186/14212	4.93553582136682e-05	0.000733957036605357	0.000578727047702029	Cacna1e/Nos1ap/Cacnb2/Grik3/Cntnap2/Grin2b/Shisa7/Scn3b/Ryr2	9
CST<WT	CC	GO:0043292	contractile fiber	9/129	187/14212	5.14582424188258e-05	0.000733957036605357	0.000578727047702029	Myl1/Sphkap/Atp2b4/Nos1ap/Chl1/Grin2b/Scn3b/Ank3/Ryr2	9
CST<WT	CC	GO:0042383	sarcolemma	8/129	150/14212	6.62951747770787e-05	0.000896579593772102	0.000706955360402939	Atp2b4/Nos1ap/Cacnb2/Igf1r/Sgcz/Ank3/Ryr2/Slc38a2	8
CST<WT	CC	GO:0031674	I band	7/129	112/14212	7.08733671098021e-05	0.000896579593772102	0.000706955360402939	Sphkap/Atp2b4/Nos1ap/Grin2b/Scn3b/Ank3/Ryr2	7
CST<WT	CC	GO:0030017	sarcomere	8/129	152/14212	7.2785059273012e-05	0.000896579593772102	0.000706955360402939	Sphkap/Atp2b4/Nos1ap/Chl1/Grin2b/Scn3b/Ank3/Ryr2	8
CST<WT	MF	GO:0004713	protein tyrosine kinase activity	7/123	116/13889	7.55407949624623e-05	0.00686326177533962	0.00592204351852877	Epha5/Met/Igf1r/Ntrk3/Peak1/Dyrk2/Sla	7
CST<WT	MF	GO:0042165	neurotransmitter binding	5/123	50/13889	7.73325270460802e-05	0.00686326177533962	0.00592204351852877	Chrna4/Grin2b/Glra3/Chrm3/Htr1a	5
CST<WT	MF	GO:0042562	hormone binding	6/123	84/13889	9.87321089110183e-05	0.0070099797326823	0.00604864077749607	Chrna4/Igf1r/Crym/Chrm3/Agtr2/Ar	6
CST<WT	BP	GO:0007215	glutamate receptor signaling pathway	6/127	82/13966	9.99694279766196e-05	0.0160550901330451	0.0136940577831833	Grik3/Grin2b/Shisa7/Grm5/Gsg1l/Gnaq	6
CST<WT	BP	GO:0021680	cerebellar Purkinje cell layer development	4/127	28/13966	0.000112749293734293	0.0168554961692714	0.0143767575637053	Rere/Sez6l/Sez6/Faim2	4
CST<WT	BP	GO:0035640	exploration behavior	4/127	29/13966	0.00012987277868307	0.0168554961692714	0.0143767575637053	Chrna4/Chl1/Htr1a/Agtr2	4
CST<WT	BP	GO:0023061	signal release	13/127	425/13966	0.000130526083934685	0.0168554961692714	0.0143767575637053	Cacna1e/Chrna4/Pclo/Epha5/Prkcg/Glra3/Npy1r/Syt1/Sox11/Gpr68/Htr1a/Syt4/Agtr2	13
CST<WT	CC	GO:0044449	contractile fiber part	8/129	166/14212	0.000134652540895009	0.00158655819924119	0.00125100529984836	Sphkap/Atp2b4/Nos1ap/Chl1/Grin2b/Scn3b/Ank3/Ryr2	8
CST<WT	BP	GO:0015844	monoamine transport	6/127	88/13966	0.000148002853682357	0.0168554961692714	0.0143767575637053	Fcer1g/Chrna4/Syt1/Htr1a/Syt4/Agtr2	6
CST<WT	BP	GO:0021695	cerebellar cortex development	5/127	56/13966	0.000151407674494269	0.0168554961692714	0.0143767575637053	Rere/Sez6l/Sez6/Faim2/Agtr2	5
CST<WT	BP	GO:0048489	synaptic vesicle transport	8/127	169/13966	0.000153931471865492	0.0168554961692714	0.0143767575637053	Chrna4/Pclo/Prkcg/Glra3/Syt1/Htr1a/Dpysl2/Syt4	8
CST<WT	BP	GO:0097480	establishment of synaptic vesicle localization	8/127	169/13966	0.000153931471865492	0.0168554961692714	0.0143767575637053	Chrna4/Pclo/Prkcg/Glra3/Syt1/Htr1a/Dpysl2/Syt4	8
WT<CST	MF	GO:0005179	hormone activity	5/130	55/13889	0.000159006121895553	0.0122832229164315	0.0112141159652654	Vgf/Npy/Sst/Adcyap1/Apln	5
CST<WT	CC	GO:0099634	postsynaptic specialization membrane	7/129	128/14212	0.000164052060947735	0.00185242118820151	0.00146063896370132	Chrna4/Grin2b/Shisa7/Grm5/Gsg1l/Glra3/Chrm3	7
CST<WT	BP	GO:0014049	positive regulation of glutamate secretion	3/127	13/13966	0.000196497071968446	0.0180963140209358	0.0154351029992207	Grin2b/Dpysl2/Syt4	3
CST<WT	BP	GO:0034765	regulation of ion transmembrane transport	12/127	385/13966	0.0002012898879654	0.0180963140209358	0.0154351029992207	Atp2b4/Cacna1e/Nos1ap/Cacnb2/Chrna4/Shisa7/Grm5/Gsg1l/Scn3b/Ank3/Ryr2/Fhl1	12
CST<WT	BP	GO:0045055	regulated exocytosis	9/127	224/13966	0.000206021244141629	0.0180963140209358	0.0154351029992207	Fcer1g/Chrna4/Pclo/Prkcg/Glra3/Syt1/Pla2g3/Htr1a/Syt4	9
CST<WT	BP	GO:0016079	synaptic vesicle exocytosis	7/127	133/13966	0.000209909451622027	0.0180963140209358	0.0154351029992207	Chrna4/Pclo/Prkcg/Glra3/Syt1/Htr1a/Syt4	7
CST<WT	BP	GO:0030902	hindbrain development	7/127	133/13966	0.000209909451622027	0.0180963140209358	0.0154351029992207	Rere/Sez6l/Foxp2/Igf1r/Sez6/Faim2/Agtr2	7
CST<WT	BP	GO:0051952	regulation of amine transport	6/127	94/13966	0.000212719343163349	0.0180963140209358	0.0154351029992207	Chrna4/Grin2b/Syt1/Dpysl2/Syt4/Agtr2	6
CST<WT	BP	GO:1904062	regulation of cation transmembrane transport	10/127	277/13966	0.000217846868662157	0.0180963140209358	0.0154351029992207	Atp2b4/Nos1ap/Cacnb2/Chrna4/Shisa7/Gsg1l/Scn3b/Ank3/Ryr2/Fhl1	10
CST<WT	BP	GO:0097479	synaptic vesicle localization	8/127	180/13966	0.000237064016103287	0.0181248284262166	0.0154594241279303	Chrna4/Pclo/Prkcg/Glra3/Syt1/Htr1a/Dpysl2/Syt4	8
CST<WT	BP	GO:0007638	mechanosensory behavior	3/127	14/13966	0.00024842803932088	0.0181248284262166	0.0154594241279303	Foxp2/Cntnap2/Etv1	3
CST<WT	CC	GO:0042734	presynaptic membrane	8/129	182/14212	0.00025300453013588	0.00265748642517502	0.00209543501382998	Atp2b4/Cacna1e/Chrna4/Grik3/Grin2b/Syt1/Chrm3/Htr1a	8
CST<WT	CC	GO:0044306	neuron projection terminus	8/129	183/14212	0.000262582932332378	0.00265748642517502	0.00209543501382998	Grik3/Pclo/Grin2b/Prkcg/Syt1/Chrm3/Dpysl2/Syt4	8
CST<WT	CC	GO:0099060	integral component of postsynaptic specialization membrane	6/129	98/14212	0.000264768020220389	0.00265748642517502	0.00209543501382998	Chrna4/Grin2b/Shisa7/Gsg1l/Glra3/Chrm3	6
CST<WT	BP	GO:0015837	amine transport	6/127	98/13966	0.000266996901582105	0.0181248284262166	0.0154594241279303	Chrna4/Grin2b/Syt1/Dpysl2/Syt4/Agtr2	6
CST<WT	BP	GO:2000300	regulation of synaptic vesicle exocytosis	6/127	98/13966	0.000266996901582105	0.0181248284262166	0.0154594241279303	Chrna4/Prkcg/Glra3/Syt1/Htr1a/Syt4	6
CST<WT	BP	GO:0034762	regulation of transmembrane transport	13/127	459/13966	0.000277312775790713	0.0181248284262166	0.0154594241279303	Atp2b4/Cacna1e/Nos1ap/Cacnb2/Chrna4/Met/Shisa7/Grm5/Gsg1l/Scn3b/Ank3/Ryr2/Fhl1	13
CST<WT	BP	GO:0099003	vesicle-mediated transport in synapse	9/127	235/13966	0.000294007449568051	0.0181248284262166	0.0154594241279303	Chrna4/Pclo/Prkcg/Gsg1l/Glra3/Syt1/Htr1a/Dpysl2/Syt4	9
WT<CST	BP	GO:1901342	regulation of vasculature development	10/131	279/13966	0.000296895291627366	0.146225083006576	0.13728101676293	Creb3l1/Ecm1/Ddah1/Serpine1/Ptn/Serpinf1/Tmem100/Sphk1/Tnmd/Srpx2	10
CST<WT	BP	GO:0050804	modulation of chemical synaptic transmission	13/127	463/13966	0.000301496767696143	0.0181248284262166	0.0154594241279303	Chrna4/Rapgef2/Grik3/Met/Grin2b/Prkcg/Shisa7/Grm5/Glra3/Syt1/Htr1a/Mapk1/Syt4	13
CST<WT	BP	GO:0050918	positive chemotaxis	4/127	36/13966	0.00030664379470906	0.0181248284262166	0.0154594241279303	Met/Ntrk3/Fgf10/Vegfd	4
CST<WT	BP	GO:0099177	regulation of trans-synaptic signaling	13/127	464/13966	0.000307817249903242	0.0181248284262166	0.0154594241279303	Chrna4/Rapgef2/Grik3/Met/Grin2b/Prkcg/Shisa7/Grm5/Glra3/Syt1/Htr1a/Mapk1/Syt4	13
CST<WT	BP	GO:0086014	atrial cardiac muscle cell action potential	3/127	15/13966	0.000308475701733035	0.0181248284262166	0.0154594241279303	Cacnb2/Scn3b/Ryr2	3
CST<WT	BP	GO:0086026	atrial cardiac muscle cell to AV node cell signaling	3/127	15/13966	0.000308475701733035	0.0181248284262166	0.0154594241279303	Cacnb2/Scn3b/Ryr2	3
CST<WT	BP	GO:0086066	atrial cardiac muscle cell to AV node cell communication	3/127	15/13966	0.000308475701733035	0.0181248284262166	0.0154594241279303	Cacnb2/Scn3b/Ryr2	3
CST<WT	BP	GO:1902803	regulation of synaptic vesicle transport	6/127	102/13966	0.000331613213747844	0.0190203864742513	0.016223283038491	Chrna4/Prkcg/Glra3/Syt1/Htr1a/Syt4	6
WT<CST	MF	GO:0005184	neuropeptide hormone activity	3/130	15/13889	0.000335771884833045	0.0207507024826822	0.0189446031863697	Vgf/Npy/Adcyap1	3
CST<WT	CC	GO:0030315	T-tubule	5/129	67/14212	0.000350885598078397	0.00339607132425877	0.00267781114322987	Atp2b4/Nos1ap/Cacnb2/Igf1r/Ank3	5
CST<WT	CC	GO:0098948	intrinsic component of postsynaptic specialization membrane	6/129	104/14212	0.000365153768908052	0.00341229901289938	0.00269060671826986	Chrna4/Grin2b/Shisa7/Gsg1l/Glra3/Chrm3	6
CST<WT	BP	GO:0110110	positive regulation of animal organ morphogenesis	5/127	68/13966	0.000378789491390393	0.0212210205758013	0.0181002958921432	Cd34/Foxp2/Fgf10/Agtr2/Ar	5
CST<WT	BP	GO:0015696	ammonium transport	6/127	105/13966	0.000387653455457159	0.0212240266862794	0.0181028599294826	Fcer1g/Chrna4/Syt1/Htr1a/Slc38a2/Syt4	6
WT<CST	BP	GO:0050678	regulation of epithelial cell proliferation	10/131	289/13966	0.000392456339404625	0.146225083006576	0.13728101676293	Scg2/Ecm1/Rap1gap/Ptn/Ccnd1/Gpx1/Serpinf1/Plau/Apln/Tnmd	10
CST<WT	BP	GO:1903522	regulation of blood circulation	8/127	195/13966	0.000406580399293734	0.0217656040421913	0.0185647939045934	Atp2b4/Cacna1e/Cacnb2/Npy1r/Scn3b/Chrm3/Ryr2/Agtr2	8
WT<CST	BP	GO:0042135	neurotransmitter catabolic process	3/131	16/13966	0.000413061026059822	0.146225083006576	0.13728101676293	Ache/Amt/Colq	3
CST<WT	CC	GO:0099056	integral component of presynaptic membrane	6/129	107/14212	0.000425399205014073	0.00384277281862713	0.00303003644273182	Atp2b4/Cacna1e/Chrna4/Grin2b/Chrm3/Htr1a	6
CST<WT	BP	GO:0072578	neurotransmitter-gated ion channel clustering	3/127	17/13966	0.000454927963121605	0.0233174779395733	0.0198884520495716	Shisa7/Glra3/Htr1a	3
CST<WT	BP	GO:0086012	membrane depolarization during cardiac muscle cell action potential	3/127	17/13966	0.000454927963121605	0.0233174779395733	0.0198884520495716	Cacnb2/Scn3b/Ank3	3
CST<WT	BP	GO:0007612	learning	7/127	152/13966	0.000473270514584982	0.0233910751756733	0.0199512262100082	Adgrb3/Cacna1e/Pak7/Foxp2/Cntnap2/Grin2b/Grm5	7
CST<WT	MF	GO:0015085	calcium ion transmembrane transporter activity	6/123	112/13889	0.000475232596887984	0.0281179286492057	0.0242618746832286	Atp2b4/Cacna1e/Cacnb2/Grin2b/Slc24a4/Ryr2	6
CST<WT	BP	GO:0007611	learning or memory	9/127	251/13966	0.000475783596350349	0.0233910751756733	0.0199512262100082	Adgrb3/Cacna1e/Pak7/Foxp2/Cntnap2/Grin2b/Shisa7/Grm5/Syt4	9
CST<WT	BP	GO:0043270	positive regulation of ion transport	9/127	252/13966	0.000489675577879241	0.0235925693422218	0.0201230890109532	Cacnb2/Chrna4/Grin2b/Scn3b/Ank3/Ryr2/Dpysl2/Syt4/Fhl1	9
WT<CST	BP	GO:0043062	extracellular structure organization	9/131	245/13966	0.000501111098354114	0.146225083006576	0.13728101676293	Creb3l1/Col9a3/Col27a1/Vwa1/Colq/Col11a2/Lipg/Kazald1/Nox1	9
CST<WT	CC	GO:0060076	excitatory synapse	5/129	73/14212	0.000522576677347808	0.00456833159875019	0.00360214144317844	Pclo/Met/Grin2b/Shisa7/Syt1	5
CST<WT	BP	GO:0051899	membrane depolarization	5/127	73/13966	0.000526420663582832	0.0243624510275709	0.0207797532961125	Cacnb2/Chrna4/Scn3b/Ank3/Fhl1	5
CST<WT	BP	GO:0006935	chemotaxis	12/127	429/13966	0.000535994148800854	0.0243624510275709	0.0207797532961125	Fcer1g/Epha5/Met/Chl1/Ntrk3/Ank3/Etv1/Lyst/Fgf10/Dpysl2/Matn2/Vegfd	12
CST<WT	BP	GO:0051656	establishment of organelle localization	12/127	429/13966	0.000535994148800854	0.0243624510275709	0.0207797532961125	Fcer1g/Chrna4/Pclo/Prkcg/Glra3/Wasf1/Syt1/Pla2g3/Htr1a/Fgf10/Dpysl2/Syt4	12
CST<WT	BP	GO:0001764	neuron migration	7/127	156/13966	0.000552944375438096	0.0244644858091481	0.020866783028318	Nav1/Astn1/Rapgef2/Met/Chl1/Ntrk3/Matn2	7
WT<CST	BP	GO:0010469	regulation of signaling receptor activity	6/131	109/13966	0.000558365271114604	0.146225083006576	0.13728101676293	Serpine1/Nptx2/Ramp3/Crhbp/Plau/Lynx1	6
CST<WT	BP	GO:0042330	taxis	12/127	431/13966	0.000558549904318449	0.0244644858091481	0.020866783028318	Fcer1g/Epha5/Met/Chl1/Ntrk3/Ank3/Etv1/Lyst/Fgf10/Dpysl2/Matn2/Vegfd	12
WT<CST	CC	GO:0033267	axon part	12/134	417/14212	0.000580800113262087	0.0447216087211807	0.0425920083058864	Gad1/Bdnf/Kcnip3/Nptx2/Npy/Ank1/Serpinf1/Kif3c/Nrsn1/Crhbp/Pnoc/Adcyap1	12
WT<CST	MF	GO:0071855	neuropeptide receptor binding	3/130	18/13889	0.000589933408137925	0.0303815705191032	0.0277372198913972	Npy/Adcyap1/Apln	3
WT<CST	BP	GO:0045765	regulation of angiogenesis	9/131	251/13966	0.000596532720067621	0.146225083006576	0.13728101676293	Creb3l1/Ecm1/Ddah1/Serpine1/Ptn/Serpinf1/Sphk1/Tnmd/Srpx2	9
CST<WT	BP	GO:0035637	multicellular organismal signaling	6/127	115/13966	0.000629582562838522	0.0267046723806948	0.0227775318376773	Cacna1e/Cacnb2/Ntrk3/Scn3b/Ank3/Ryr2	6
CST<WT	BP	GO:0007187	G protein-coupled receptor signaling pathway, coupled to cyclic nucleotide second messenger	7/127	160/13966	0.000642951846442632	0.0267046723806948	0.0227775318376773	Adgrb3/Atp2b4/Rapgef2/Chrm3/Htr1a/Gnaq/Agtr2	7
CST<WT	BP	GO:1903305	regulation of regulated secretory pathway	7/127	160/13966	0.000642951846442632	0.0267046723806948	0.0227775318376773	Fcer1g/Chrna4/Prkcg/Glra3/Syt1/Htr1a/Syt4	7
CST<WT	MF	GO:0022824	transmitter-gated ion channel activity	4/123	45/13889	0.00065914147130341	0.0292494027890888	0.0252381800196437	Chrna4/Grik3/Grin2b/Glra3	4
CST<WT	MF	GO:0022835	transmitter-gated channel activity	4/123	45/13889	0.00065914147130341	0.0292494027890888	0.0252381800196437	Chrna4/Grik3/Grin2b/Glra3	4
CST<WT	BP	GO:0017156	calcium ion regulated exocytosis	7/127	161/13966	0.000667176794620073	0.0268257956288117	0.022880842921256	Chrna4/Pclo/Prkcg/Glra3/Syt1/Htr1a/Syt4	7
CST<WT	BP	GO:0051954	positive regulation of amine transport	4/127	44/13966	0.000668139368089956	0.0268257956288117	0.022880842921256	Chrna4/Grin2b/Dpysl2/Syt4	4
CST<WT	BP	GO:0019932	second-messenger-mediated signaling	10/127	321/13966	0.00069601485880112	0.0268614740664803	0.0229112745527822	Adgrb3/Atp2b4/Rapgef2/Pclo/Epha5/Ksr2/Grm5/Dyrk2/Ryr2/Gnaq	10
CST<WT	BP	GO:0001505	regulation of neurotransmitter levels	10/127	322/13966	0.000712871766631394	0.0268614740664803	0.0229112745527822	Atp2b4/Cd34/Chrna4/Pclo/Prkcg/Glra3/Moxd1/Syt1/Htr1a/Syt4	10
CST<WT	BP	GO:0002027	regulation of heart rate	5/127	78/13966	0.000713629863119444	0.0268614740664803	0.0229112745527822	Cacna1e/Cacnb2/Scn3b/Ryr2/Agtr2	5
CST<WT	BP	GO:0018958	phenol-containing compound metabolic process	5/127	78/13966	0.000713629863119444	0.0268614740664803	0.0229112745527822	Rapgef2/Crym/Moxd1/Htr1a/Agtr2	5
CST<WT	BP	GO:0017157	regulation of exocytosis	8/127	213/13966	0.000728422656314598	0.0269964642932595	0.0230264133623659	Fcer1g/Chrna4/Pclo/Prkcg/Glra3/Syt1/Htr1a/Syt4	8
CST<WT	CC	GO:0098889	intrinsic component of presynaptic membrane	6/129	119/14212	0.000747743383544491	0.00633245177939241	0.00499315483090565	Atp2b4/Cacna1e/Chrna4/Grin2b/Chrm3/Htr1a	6
CST<WT	BP	GO:0003012	muscle system process	10/127	325/13966	0.000765479014500061	0.0279399840292522	0.0238311808022986	Myl1/Atp2b4/Cacnb2/Met/Npy1r/Scn3b/Chrm3/Ryr2/Agtr2/Ar	10
WT<CST	BP	GO:0042133	neurotransmitter metabolic process	6/131	117/13966	0.00081144046421972	0.161682955270952	0.151793386171875	Gad1/Ddah1/Ache/Amt/Colq/Gla	6
WT<CST	BP	GO:0030198	extracellular matrix organization	8/131	211/13966	0.000839687957085861	0.161682955270952	0.151793386171875	Creb3l1/Col9a3/Col27a1/Vwa1/Colq/Col11a2/Kazald1/Nox1	8
CST<WT	BP	GO:0050927	positive regulation of positive chemotaxis	3/127	21/13966	0.000866458307519614	0.0311537024300709	0.0265722956210257	Ntrk3/Fgf10/Vegfd	3
WT<CST	MF	GO:0004867	serine-type endopeptidase inhibitor activity	4/130	46/13889	0.000882103324477055	0.03893856103763	0.0355494272120076	Serpine1/Serpinf1/Papln/Serpina3n	4
WT<CST	CC	GO:0043679	axon terminus	7/134	163/14212	0.000890716741560103	0.051438891825096	0.0489894207858057	Gad1/Bdnf/Kcnip3/Npy/Crhbp/Pnoc/Adcyap1	7
CST<WT	BP	GO:0017158	regulation of calcium ion-dependent exocytosis	6/127	123/13966	0.000896412429067211	0.0317567285532781	0.0270866418194922	Chrna4/Prkcg/Glra3/Syt1/Htr1a/Syt4	6
WT<CST	BP	GO:0001505	regulation of neurotransmitter levels	10/131	322/13966	0.000906941615492334	0.161682955270952	0.151793386171875	Syt2/Gad1/Ddah1/Ache/Cadps2/Amt/Sphk1/Colq/Syt12/Gla	10
CST<WT	BP	GO:0014048	regulation of glutamate secretion	3/127	22/13966	0.000996632985597665	0.0333456786431219	0.0284419237995123	Grin2b/Dpysl2/Syt4	3
CST<WT	BP	GO:0050926	regulation of positive chemotaxis	3/127	22/13966	0.000996632985597665	0.0333456786431219	0.0284419237995123	Ntrk3/Fgf10/Vegfd	3
CST<WT	BP	GO:0071868	cellular response to monoamine stimulus	3/127	22/13966	0.000996632985597665	0.0333456786431219	0.0284419237995123	Atp2b4/Ryr2/Mapk1	3
CST<WT	BP	GO:0071870	cellular response to catecholamine stimulus	3/127	22/13966	0.000996632985597665	0.0333456786431219	0.0284419237995123	Atp2b4/Ryr2/Mapk1	3
CST<WT	CC	GO:0034704	calcium channel complex	4/129	49/14212	0.00100075080705982	0.00821828693070341	0.00648014079212582	Cacna1e/Nos1ap/Cacnb2/Ryr2	4
CST<WT	BP	GO:0046928	regulation of neurotransmitter secretion	6/127	126/13966	0.00101627257912164	0.0335369951110143	0.0286051056156518	Chrna4/Prkcg/Glra3/Syt1/Htr1a/Syt4	6
CST<WT	BP	GO:0086001	cardiac muscle cell action potential	4/127	50/13966	0.0010868828623334	0.0341073727904968	0.0290916045911384	Cacnb2/Scn3b/Ank3/Ryr2	4
CST<WT	BP	GO:0007269	neurotransmitter secretion	7/127	175/13966	0.00108896135987474	0.0341073727904968	0.0290916045911384	Chrna4/Pclo/Prkcg/Glra3/Syt1/Htr1a/Syt4	7
CST<WT	BP	GO:0099643	signal release from synapse	7/127	175/13966	0.00108896135987474	0.0341073727904968	0.0290916045911384	Chrna4/Pclo/Prkcg/Glra3/Syt1/Htr1a/Syt4	7
CST<WT	BP	GO:0009914	hormone transport	9/127	282/13966	0.00109018999786976	0.0341073727904968	0.0290916045911384	Cacna1e/Pclo/Epha5/Crym/Npy1r/Sox11/Gpr68/Htr1a/Agtr2	9
CST<WT	BP	GO:0071867	response to monoamine	3/127	23/13966	0.00113855176472435	0.0347186228002654	0.0296129652863682	Atp2b4/Ryr2/Mapk1	3
CST<WT	BP	GO:0071869	response to catecholamine	3/127	23/13966	0.00113855176472435	0.0347186228002654	0.0296129652863682	Atp2b4/Ryr2/Mapk1	3
CST<WT	BP	GO:0060425	lung morphogenesis	4/127	51/13966	0.00117116654647253	0.0352667526306541	0.0300804881409787	Foxp2/Sox11/Fgf10/Mapk1	4
CST<WT	BP	GO:0045744	negative regulation of G protein-coupled receptor signaling pathway	4/127	52/13966	0.00125992638171326	0.0374711438709536	0.0319607056153903	Atp2b4/Met/Grm5/Ubqln2	4
CST<WT	BP	GO:0051957	positive regulation of amino acid transport	3/127	24/13966	0.00129260428126717	0.0375166712478629	0.0319995378190681	Grin2b/Dpysl2/Syt4	3
CST<WT	BP	GO:0086019	cell-cell signaling involved in cardiac conduction	3/127	24/13966	0.00129260428126717	0.0375166712478629	0.0319995378190681	Cacnb2/Scn3b/Ryr2	3
CST<WT	MF	GO:0004714	transmembrane receptor protein tyrosine kinase activity	4/123	54/13889	0.00131594557975761	0.0342738842004145	0.0295736109779707	Epha5/Met/Igf1r/Ntrk3	4
CST<WT	MF	GO:0005230	extracellular ligand-gated ion channel activity	4/123	54/13889	0.00131594557975761	0.0342738842004145	0.0295736109779707	Chrna4/Grik3/Grin2b/Glra3	4
CST<WT	BP	GO:1903532	positive regulation of secretion by cell	10/127	350/13966	0.00134119786422226	0.0384636387489456	0.0328072460020283	Fcer1g/Cd34/Chrna4/Grin2b/Syt1/Sox11/Gpr68/Dpysl2/Syt4/Agtr2	10
CST<WT	MF	GO:0008066	glutamate receptor activity	3/123	25/13889	0.0013520160297512	0.0342738842004145	0.0295736109779707	Grik3/Grin2b/Grm5	3
WT<CST	CC	GO:0150034	distal axon	10/134	338/14212	0.00136395010288999	0.0531730370177888	0.0506409876359893	Gad1/Bdnf/Kcnip3/Nptx2/Npy/Kif3c/Nrsn1/Crhbp/Pnoc/Adcyap1	10
WT<CST	BP	GO:0050673	epithelial cell proliferation	10/131	340/13966	0.00136639810541345	0.223292223726315	0.209634235646327	Scg2/Ecm1/Rap1gap/Ptn/Ccnd1/Gpx1/Serpinf1/Plau/Apln/Tnmd	10
CST<WT	MF	GO:0005231	excitatory extracellular ligand-gated ion channel activity	3/123	26/13889	0.0015185440401442	0.0342738842004145	0.0295736109779707	Chrna4/Grin2b/Glra3	3
CST<WT	MF	GO:0005262	calcium channel activity	5/123	95/13889	0.00154098549740578	0.0342738842004145	0.0295736109779707	Cacna1e/Cacnb2/Grin2b/Slc24a4/Ryr2	5
CST<WT	MF	GO:0005261	cation channel activity	8/123	246/13889	0.00154680040827574	0.0342738842004145	0.0295736109779707	Cacna1e/Cacnb2/Chrna4/Grik3/Grin2b/Scn3b/Slc24a4/Ryr2	8
CST<WT	BP	GO:0060688	regulation of morphogenesis of a branching structure	4/127	55/13966	0.00155431591230933	0.0438116416170341	0.037368781296651	Met/Fgf10/Agtr2/Ar	4
CST<WT	BP	GO:0019933	cAMP-mediated signaling	6/127	137/13966	0.00156405196308216	0.0438116416170341	0.037368781296651	Adgrb3/Atp2b4/Rapgef2/Pclo/Epha5/Gnaq	6
CST<WT	MF	GO:0008188	neuropeptide receptor activity	3/123	27/13889	0.00169738777171266	0.0342738842004145	0.0295736109779707	Npy1r/Gpr83/Nmbr	3
CST<WT	MF	GO:0022839	ion gated channel activity	8/123	250/13889	0.00171231295478248	0.0342738842004145	0.0295736109779707	Cacna1e/Cacnb2/Chrna4/Grik3/Grin2b/Glra3/Scn3b/Ryr2	8
CST<WT	BP	GO:0044070	regulation of anion transport	5/127	95/13966	0.00173261204395057	0.0476342611018456	0.040629253313584	Grin2b/Grm5/Dpysl2/Syt4/Agtr2	5
WT<CST	CC	GO:0044306	neuron projection terminus	7/134	183/14212	0.00174004228009981	0.0531730370177888	0.0506409876359893	Gad1/Bdnf/Kcnip3/Npy/Crhbp/Pnoc/Adcyap1	7
CST<WT	BP	GO:0051650	establishment of vesicle localization	8/127	244/13966	0.00174006433248751	0.0476342611018456	0.040629253313584	Chrna4/Pclo/Prkcg/Glra3/Syt1/Htr1a/Dpysl2/Syt4	8
WT<CST	MF	GO:0043236	laminin binding	3/130	26/13889	0.00177973013201697	0.0687420763491555	0.0627589046553353	Ecm1/Ache/Itga9	3
WT<CST	BP	GO:0015804	neutral amino acid transport	3/131	26/13966	0.0017908276671742	0.262530449547505	0.246472399290687	Slc7a10/Slc38a3/Nfkbie	3
CST<WT	BP	GO:0098693	regulation of synaptic vesicle cycle	6/127	141/13966	0.00181078209398565	0.0484781504870891	0.0413490418609154	Chrna4/Prkcg/Glra3/Syt1/Htr1a/Syt4	6
CST<WT	MF	GO:0005216	ion channel activity	9/123	312/13889	0.00181961540757999	0.0342738842004145	0.0295736109779707	Cacna1e/Cacnb2/Chrna4/Grik3/Grin2b/Glra3/Scn3b/Slc24a4/Ryr2	9
CST<WT	CC	GO:0031045	dense core granule	3/129	27/14212	0.00182230341646572	0.014524830172418	0.0114528666731437	Syt1/Syt4/Vps13a	3
CST<WT	BP	GO:0060512	prostate gland morphogenesis	3/127	27/13966	0.00183126263774392	0.0484781504870891	0.0413490418609154	Igf1r/Fgf10/Ar	3
CST<WT	BP	GO:0060740	prostate gland epithelium morphogenesis	3/127	27/13966	0.00183126263774392	0.0484781504870891	0.0413490418609154	Igf1r/Fgf10/Ar	3
WT<CST	CC	GO:0005604	basement membrane	5/134	93/14212	0.00185097491599169	0.0531730370177888	0.0506409876359893	Vwa1/Ache/Ptn/Serpinf1/Papln	5
CST<WT	MF	GO:0015276	ligand-gated ion channel activity	5/123	100/13889	0.00193344226241565	0.0342738842004145	0.0295736109779707	Chrna4/Grik3/Grin2b/Glra3/Ryr2	5
CST<WT	MF	GO:0022834	ligand-gated channel activity	5/123	100/13889	0.00193344226241565	0.0342738842004145	0.0295736109779707	Chrna4/Grik3/Grin2b/Glra3/Ryr2	5
WT<CST	BP	GO:0016525	negative regulation of angiogenesis	5/131	95/13966	0.00198551943977224	0.262530449547505	0.246472399290687	Creb3l1/Serpine1/Ptn/Serpinf1/Tnmd	5
CST<WT	MF	GO:0022836	gated channel activity	8/123	256/13889	0.00198657988978436	0.0342738842004145	0.0295736109779707	Cacna1e/Cacnb2/Chrna4/Grik3/Grin2b/Glra3/Scn3b/Ryr2	8
CST<WT	BP	GO:0050433	regulation of catecholamine secretion	4/127	59/13966	0.00201707472190145	0.0522159524660788	0.044537169480145	Chrna4/Syt1/Syt4/Agtr2	4
CST<WT	MF	GO:0022838	substrate-specific channel activity	9/123	317/13889	0.0020274692062217	0.0342738842004145	0.0295736109779707	Cacna1e/Cacnb2/Chrna4/Grik3/Grin2b/Glra3/Scn3b/Slc24a4/Ryr2	9
WT<CST	CC	GO:0031045	dense core granule	3/134	27/14212	0.00203144932088032	0.0531730370177888	0.0506409876359893	Scg2/Syt2/Crhbp	3
CST<WT	BP	GO:0048265	response to pain	3/127	28/13966	0.00203748423902508	0.0522159524660788	0.044537169480145	Cacna1e/Grin2b/Prkcg	3
CST<WT	BP	GO:0086010	membrane depolarization during action potential	3/127	28/13966	0.00203748423902508	0.0522159524660788	0.044537169480145	Cacnb2/Scn3b/Ank3	3
CST<WT	BP	GO:2001257	regulation of cation channel activity	6/127	145/13966	0.00208599229041362	0.052755390935884	0.0449972791098493	Nos1ap/Cacnb2/Chrna4/Shisa7/Gsg1l/Ank3	6
CST<WT	BP	GO:0051047	positive regulation of secretion	10/127	372/13966	0.00210339013569436	0.052755390935884	0.0449972791098493	Fcer1g/Cd34/Chrna4/Grin2b/Syt1/Sox11/Gpr68/Dpysl2/Syt4/Agtr2	10
WT<CST	BP	GO:0010466	negative regulation of peptidase activity	6/131	141/13966	0.00211865343422686	0.262530449547505	0.246472399290687	Ecm1/Serpine1/Gpx1/Serpinf1/Papln/Serpina3n	6
CST<WT	BP	GO:0030317	flagellated sperm motility	4/127	60/13966	0.002146130473938	0.052755390935884	0.0449972791098493	Atp2b4/Cacna1e/Met/Pla2g3	4
CST<WT	BP	GO:0043113	receptor clustering	4/127	60/13966	0.002146130473938	0.052755390935884	0.0449972791098493	Grin2b/Shisa7/Glra3/Htr1a	4
WT<CST	BP	GO:0002026	regulation of the force of heart contraction	3/131	28/13966	0.0022258216547837	0.262530449547505	0.246472399290687	Myl4/Chga/Apln	3
WT<CST	BP	GO:2000181	negative regulation of blood vessel morphogenesis	5/131	98/13966	0.00227588864982539	0.262530449547505	0.246472399290687	Creb3l1/Serpine1/Ptn/Serpinf1/Tnmd	5
CST<WT	BP	GO:0032890	regulation of organic acid transport	4/127	61/13966	0.00228077704303121	0.0543999197689326	0.0463999665241994	Grin2b/Dpysl2/Syt4/Agtr2	4
CST<WT	BP	GO:0051705	multi-organism behavior	4/127	61/13966	0.00228077704303121	0.0543999197689326	0.0463999665241994	Cntnap2/Grin2b/Grp/Vps13a	4
CST<WT	BP	GO:0097722	sperm motility	4/127	61/13966	0.00228077704303121	0.0543999197689326	0.0463999665241994	Atp2b4/Cacna1e/Met/Pla2g3	4
CST<WT	BP	GO:0007188	adenylate cyclase-modulating G protein-coupled receptor signaling pathway	6/127	149/13966	0.00239172520240126	0.0555832858756163	0.047409308963843	Adgrb3/Atp2b4/Rapgef2/Chrm3/Htr1a/Gnaq	6
CST<WT	BP	GO:0008016	regulation of heart contraction	6/127	149/13966	0.00239172520240126	0.0555832858756163	0.047409308963843	Atp2b4/Cacna1e/Cacnb2/Scn3b/Ryr2/Agtr2	6
CST<WT	BP	GO:0050432	catecholamine secretion	4/127	62/13966	0.00242113543548469	0.0555832858756163	0.047409308963843	Chrna4/Syt1/Syt4/Agtr2	4
CST<WT	BP	GO:0035690	cellular response to drug	8/127	258/13966	0.00246309699386133	0.0555832858756163	0.047409308963843	Chrna4/Epha5/Met/Glra3/Chrm3/Ryr2/Mapk1/Agtr2	8
CST<WT	BP	GO:0060048	cardiac muscle contraction	5/127	103/13966	0.00247134798538531	0.0555832858756163	0.047409308963843	Myl1/Cacnb2/Met/Scn3b/Ryr2	5
CST<WT	BP	GO:0014047	glutamate secretion	3/127	30/13966	0.00249190322730036	0.0555832858756163	0.047409308963843	Grin2b/Dpysl2/Syt4	3
CST<WT	BP	GO:0033363	secretory granule organization	3/127	30/13966	0.00249190322730036	0.0555832858756163	0.047409308963843	Pla2g3/Lyst/Syt4	3
CST<WT	BP	GO:0030534	adult behavior	6/127	151/13966	0.0025566871278025	0.056062447318095	0.0478180057962122	Chrna4/Sez6l/Met/Cntnap2/Chl1/Sez6	6
CST<WT	BP	GO:0048168	regulation of neuronal synaptic plasticity	4/127	63/13966	0.00256732589695034	0.056062447318095	0.0478180057962122	Grin2b/Shisa7/Grm5/Syt4	4
CST<WT	BP	GO:0051648	vesicle localization	8/127	260/13966	0.00258320118402181	0.056062447318095	0.0478180057962122	Chrna4/Pclo/Prkcg/Glra3/Syt1/Htr1a/Dpysl2/Syt4	8
WT<CST	CC	GO:0000786	nucleosome	4/134	61/14212	0.00260239040944845	0.0531730370177888	0.0506409876359893	Hist1h4k/Hist1h1e/Hist1h1c/Irf4	4
WT<CST	CC	GO:0099503	secretory vesicle	11/134	435/14212	0.00273815119677422	0.0531730370177888	0.0506409876359893	Scg2/Syt2/Bdnf/Vgf/Serpine1/Gkn1/Sphk1/Kif3c/Chga/Crhbp/Syt12	11
WT<CST	CC	GO:0030141	secretory granule	8/134	253/14212	0.00273952678340123	0.0531730370177888	0.0506409876359893	Scg2/Syt2/Bdnf/Vgf/Serpine1/Gkn1/Chga/Crhbp	8
WT<CST	CC	GO:0000788	nuclear nucleosome	3/134	30/14212	0.00276223568923578	0.0531730370177888	0.0506409876359893	Hist1h4k/Hist1h1e/Irf4	3
CST<WT	MF	GO:0015267	channel activity	9/123	332/13889	0.0027671932725481	0.0417603718746092	0.0360334120548889	Cacna1e/Cacnb2/Chrna4/Grik3/Grin2b/Glra3/Scn3b/Slc24a4/Ryr2	9
CST<WT	MF	GO:0022803	passive transmembrane transporter activity	9/123	332/13889	0.0027671932725481	0.0417603718746092	0.0360334120548889	Cacna1e/Cacnb2/Chrna4/Grik3/Grin2b/Glra3/Scn3b/Slc24a4/Ryr2	9
CST<WT	MF	GO:0046873	metal ion transmembrane transporter activity	9/123	333/13889	0.00282323640842429	0.0417603718746092	0.0360334120548889	Atp2b4/Cacna1e/Cacnb2/Grik3/Grin2b/Scn3b/Slc24a4/Ryr2/Slc4a8	9
CST<WT	BP	GO:1990089	response to nerve growth factor	3/127	32/13966	0.00300432124775484	0.0640478750959418	0.054629111090987	Rapgef2/Ntrk3/Wasf1	3
CST<WT	BP	GO:1990090	cellular response to nerve growth factor stimulus	3/127	32/13966	0.00300432124775484	0.0640478750959418	0.054629111090987	Rapgef2/Ntrk3/Wasf1	3
CST<WT	BP	GO:0006836	neurotransmitter transport	8/127	267/13966	0.00304012825432049	0.0642427102162989	0.0547952941129604	Fcer1g/Chrna4/Pclo/Prkcg/Glra3/Syt1/Htr1a/Syt4	8
CST<WT	BP	GO:0008277	regulation of G protein-coupled receptor signaling pathway	5/127	109/13966	0.00315897165183857	0.0661735887763401	0.0564422211843376	Atp2b4/Met/Grm5/Grp/Ubqln2	5
CST<WT	BP	GO:0007169	transmembrane receptor protein tyrosine kinase signaling pathway	11/127	461/13966	0.00321025449222638	0.0666681299290806	0.056864036014754	Rapgef2/Epha5/Met/Igf1r/Ntrk3/Wasf1/Fgf10/Mapk1/Agtr2/Ar/Vegfd	11
WT<CST	CC	GO:0005581	collagen trimer	4/134	65/14212	0.00327999559914776	0.0582829987233179	0.0555076178317314	Col9a3/Col27a1/Colq/Col11a2	4
CST<WT	BP	GO:0006814	sodium ion transport	6/127	159/13966	0.00330334666662944	0.0672968862233232	0.057400328552108	Atp2b4/Scn3b/Ank3/Slc24a4/Slc38a2/Slc4a8	6
CST<WT	BP	GO:0006887	exocytosis	9/127	332/13966	0.0033090318169515	0.0672968862233232	0.057400328552108	Fcer1g/Chrna4/Pclo/Prkcg/Glra3/Syt1/Pla2g3/Htr1a/Syt4	9
CST<WT	BP	GO:0051588	regulation of neurotransmitter transport	6/127	160/13966	0.00340699841287048	0.0672968862233232	0.057400328552108	Chrna4/Prkcg/Glra3/Syt1/Htr1a/Syt4	6
WT<CST	BP	GO:1901343	negative regulation of vasculature development	5/131	108/13966	0.0034684984151437	0.280007513598048	0.262880453733587	Creb3l1/Serpine1/Ptn/Serpinf1/Tnmd	5
CST<WT	BP	GO:0010817	regulation of hormone levels	10/127	399/13966	0.00348111784884495	0.0672968862233232	0.057400328552108	Cacna1e/Pclo/Epha5/Igf1r/Crym/Npy1r/Sox11/Gpr68/Htr1a/Agtr2	10
CST<WT	BP	GO:0099504	synaptic vesicle cycle	7/127	215/13966	0.00349507297854833	0.0672968862233232	0.057400328552108	Chrna4/Pclo/Prkcg/Glra3/Syt1/Htr1a/Syt4	7
CST<WT	CC	GO:1990454	L-type voltage-gated calcium channel complex	2/129	10/14212	0.00350768273295651	0.0260728138466722	0.0205584820775858	Nos1ap/Cacnb2	2
CST<WT	BP	GO:2000027	regulation of animal organ morphogenesis	6/127	161/13966	0.00351305602389952	0.0672968862233232	0.057400328552108	Cd34/Foxp2/Met/Fgf10/Agtr2/Ar	6
CST<WT	BP	GO:0030238	male sex determination	2/127	10/13966	0.00351988695065949	0.0672968862233232	0.057400328552108	Igf1r/Ar	2
CST<WT	BP	GO:0060693	regulation of branching involved in salivary gland morphogenesis	2/127	10/13966	0.00351988695065949	0.0672968862233232	0.057400328552108	Met/Fgf10	2
CST<WT	BP	GO:0086016	AV node cell action potential	2/127	10/13966	0.00351988695065949	0.0672968862233232	0.057400328552108	Cacnb2/Ryr2	2
CST<WT	BP	GO:0086027	AV node cell to bundle of His cell signaling	2/127	10/13966	0.00351988695065949	0.0672968862233232	0.057400328552108	Cacnb2/Ryr2	2
CST<WT	CC	GO:0005891	voltage-gated calcium channel complex	3/129	34/14212	0.00355975687205488	0.0260728138466722	0.0205584820775858	Cacna1e/Nos1ap/Cacnb2	3
CST<WT	CC	GO:0009925	basal plasma membrane	3/129	34/14212	0.00355975687205488	0.0260728138466722	0.0205584820775858	Cd34/Met/Ank3	3
WT<CST	MF	GO:0030020	extracellular matrix structural constituent conferring tensile strength	3/130	33/13889	0.00356086857995615	0.122256487911828	0.11161552975769	Col9a3/Col27a1/Col11a2	3
CST<WT	BP	GO:0086065	cell communication involved in cardiac conduction	3/127	34/13966	0.00357701391570682	0.0678506025428167	0.0578726163568977	Cacnb2/Scn3b/Ryr2	3
WT<CST	BP	GO:0048821	erythrocyte development	3/131	33/13966	0.00358268202742309	0.280007513598048	0.262880453733587	Rhd/Ank1/Klf1	3
CST<WT	MF	GO:0019199	transmembrane receptor protein kinase activity	4/123	71/13889	0.00360273018260296	0.050813252672885	0.0438447932625932	Epha5/Met/Igf1r/Ntrk3	4
CST<WT	BP	GO:0046879	hormone secretion	8/127	275/13966	0.00363704726948764	0.0684503661890292	0.0583841798523016	Cacna1e/Pclo/Epha5/Npy1r/Sox11/Gpr68/Htr1a/Agtr2	8
CST<WT	CC	GO:0043679	axon terminus	6/129	163/14212	0.0037034592053864	0.0264115117015714	0.020825546224195	Grik3/Pclo/Grin2b/Prkcg/Chrm3/Dpysl2	6
CST<WT	MF	GO:0008324	cation transmembrane transporter activity	11/123	483/13889	0.0037215339985775	0.050813252672885	0.0438447932625932	Atp2b4/Cacna1e/Cacnb2/Chrna4/Grik3/Grin2b/Scn3b/Slc24a4/Ryr2/Slc38a2/Slc4a8	11
CST<WT	BP	GO:0019935	cyclic-nucleotide-mediated signaling	6/127	163/13966	0.00373252504814939	0.0697027352014875	0.0594523777559169	Adgrb3/Atp2b4/Rapgef2/Pclo/Epha5/Gnaq	6
WT<CST	BP	GO:0010976	positive regulation of neuron projection development	9/131	328/13966	0.00375630871480388	0.280007513598048	0.262880453733587	Syt2/Bdnf/Ache/Ptn/Serpinf1/Sphk1/Kif3c/Alkal2/Adcyap1	9
CST<WT	BP	GO:0019233	sensory perception of pain	5/127	114/13966	0.00382954545978924	0.0709644231740945	0.0605285241903531	Cacna1e/Chrna4/Grin2b/Npy1r/Mapk1	5
CST<WT	BP	GO:0046189	phenol-containing compound biosynthetic process	3/127	35/13966	0.00388662533091585	0.0714723696349334	0.0609617729686439	Rapgef2/Moxd1/Agtr2	3
CST<WT	MF	GO:0004712	protein serine/threonine/tyrosine kinase activity	3/123	36/13889	0.00391033872908728	0.0514137129194809	0.0443629072188849	Prkcg/Dyrk2/Mapk1	3
CST<WT	MF	GO:0042166	acetylcholine binding	2/123	11/13889	0.00406076850691818	0.0514847435698556	0.0444241968238042	Chrna4/Chrm3	2
WT<CST	CC	GO:0044815	DNA packaging complex	4/134	69/14212	0.00406888413695256	0.0671365882597173	0.0639396078663974	Hist1h4k/Hist1h1e/Hist1h1c/Irf4	4
CST<WT	BP	GO:0032386	regulation of intracellular transport	10/127	409/13966	0.00414438458437394	0.0735872807622598	0.0627656691127269	Fcer1g/Chrna4/Prkcg/Glra3/Ank3/Syt1/Htr1a/Mapk1/Syt4/Agtr2	10
CST<WT	BP	GO:0014046	dopamine secretion	3/127	36/13966	0.00421207819784373	0.0735872807622598	0.0627656691127269	Chrna4/Syt1/Syt4	3
CST<WT	BP	GO:0014059	regulation of dopamine secretion	3/127	36/13966	0.00421207819784373	0.0735872807622598	0.0627656691127269	Chrna4/Syt1/Syt4	3
CST<WT	BP	GO:0042417	dopamine metabolic process	3/127	36/13966	0.00421207819784373	0.0735872807622598	0.0627656691127269	Moxd1/Htr1a/Agtr2	3
CST<WT	BP	GO:0044057	regulation of system process	11/127	478/13966	0.00421806556502916	0.0735872807622598	0.0627656691127269	Atp2b4/Cacna1e/Cacnb2/Chrna4/Shisa7/Npy1r/Scn3b/Chrm3/Ryr2/Fgf10/Agtr2	11
WT<CST	BP	GO:0001912	positive regulation of leukocyte mediated cytotoxicity	3/131	35/13966	0.00423962584710282	0.280007513598048	0.262880453733587	H60b/H2-D1/H2-T23	3
CST<WT	CC	GO:1990124	messenger ribonucleoprotein complex	2/129	11/14212	0.00426176690965158	0.0296138162183482	0.0233505717316942	Hnrnpa3/Cpeb2	2
CST<WT	BP	GO:0070588	calcium ion transmembrane transport	7/127	223/13966	0.00426856163344765	0.0735872807622598	0.0627656691127269	Atp2b4/Cacna1e/Nos1ap/Cacnb2/Grin2b/Slc24a4/Ryr2	7
CST<WT	BP	GO:0048680	positive regulation of axon regeneration	2/127	11/13966	0.00427655429917658	0.0735872807622598	0.0627656691127269	Igf1r/Ntrk3	2
CST<WT	BP	GO:0060174	limb bud formation	2/127	11/13966	0.00427655429917658	0.0735872807622598	0.0627656691127269	Sox11/Fgf10	2
CST<WT	BP	GO:0097688	glutamate receptor clustering	2/127	11/13966	0.00427655429917658	0.0735872807622598	0.0627656691127269	Shisa7/Glra3	2
CST<WT	BP	GO:0051937	catecholamine transport	4/127	73/13966	0.00437581507341715	0.0747612660415739	0.0637670102524097	Chrna4/Syt1/Syt4/Agtr2	4
CST<WT	BP	GO:0009612	response to mechanical stimulus	5/127	118/13966	0.00443507251654354	0.0752400682560097	0.0641754006841585	Foxp2/Cntnap2/Grin2b/Etv1/Ryr2	5
WT<CST	BP	GO:1904018	positive regulation of vasculature development	6/131	164/13966	0.00447555229130513	0.280007513598048	0.262880453733587	Ecm1/Ddah1/Serpine1/Tmem100/Sphk1/Srpx2	6
WT<CST	BP	GO:0051346	negative regulation of hydrolase activity	8/131	276/13966	0.00448606135203732	0.280007513598048	0.262880453733587	Ppp1r26/Ecm1/Serpine1/Gpx1/Serpinf1/Papln/Serpina3n/Adcyap1	8
CST<WT	BP	GO:0060627	regulation of vesicle-mediated transport	11/127	482/13966	0.004488525498338	0.0756143910873863	0.0644946762808669	Fcer1g/Chrna4/Pclo/Prkcg/Gsg1l/Glra3/Syt1/Htr1a/Mapk1/Syt4/Ubqln2	11
WT<CST	MF	GO:0015296	anion:cation symporter activity	2/130	11/13889	0.00452441793419093	0.135745546170117	0.123930527588456	Slc5a5/Slc12a4	2
WT<CST	BP	GO:0002476	antigen processing and presentation of endogenous peptide antigen via MHC class Ib	2/131	11/13966	0.00454347209138664	0.280007513598048	0.262880453733587	H2-D1/H2-T23	2
WT<CST	BP	GO:0002862	negative regulation of inflammatory response to antigenic stimulus	2/131	11/13966	0.00454347209138664	0.280007513598048	0.262880453733587	Gpx1/Adcyap1	2
WT<CST	BP	GO:0010447	response to acidic pH	2/131	11/13966	0.00454347209138664	0.280007513598048	0.262880453733587	Slc38a3/Nox1	2
WT<CST	BP	GO:0032736	positive regulation of interleukin-13 production	2/131	11/13966	0.00454347209138664	0.280007513598048	0.262880453733587	Irf4/H2-T23	2
WT<CST	BP	GO:0071340	skeletal muscle acetylcholine-gated channel clustering	2/131	11/13966	0.00454347209138664	0.280007513598048	0.262880453733587	Ptn/Colq	2
WT<CST	BP	GO:0086103	G protein-coupled receptor signaling pathway involved in heart process	2/131	11/13966	0.00454347209138664	0.280007513598048	0.262880453733587	Ramp3/Chga	2
CST<WT	BP	GO:0097484	dendrite extension	3/127	37/13966	0.00455360786742913	0.0757299455103482	0.064593237480588	Wasf1/Syt1/Syt4	3
CST<WT	BP	GO:0072657	protein localization to membrane	11/127	483/13966	0.00455825740929867	0.0757299455103482	0.064593237480588	Fcer1g/Cacnb2/Rapgef2/Grin2b/Shisa7/Glra3/Scn3b/Ank3/Htr1a/Zdhhc9/Ar	11
CST<WT	CC	GO:0043195	terminal bouton	4/129	74/14212	0.004566644967995	0.0309390196581661	0.0243954981184996	Grik3/Pclo/Grin2b/Dpysl2	4
CST<WT	BP	GO:0046883	regulation of hormone secretion	7/127	226/13966	0.00458980105406075	0.0757317173920024	0.0645947487925493	Cacna1e/Epha5/Npy1r/Sox11/Gpr68/Htr1a/Agtr2	7
CST<WT	MF	GO:0099094	ligand-gated cation channel activity	4/123	76/13889	0.00459897489297729	0.0562977961036875	0.048577193969379	Chrna4/Grik3/Grin2b/Ryr2	4
CST<WT	CC	GO:0033267	axon part	10/129	417/14212	0.00469527300911094	0.0310346094016845	0.0244708708818876	Nav1/Grik3/Pclo/Cntnap2/Grin2b/Prkcg/Ank3/Chrm3/Htr1a/Dpysl2	10
WT<CST	BP	GO:0045666	positive regulation of neuron differentiation	10/131	404/13966	0.0047374915873902	0.280007513598048	0.262880453733587	Syt2/Bdnf/Ache/Ptn/Gdpd5/Serpinf1/Sphk1/Kif3c/Alkal2/Adcyap1	10
WT<CST	MF	GO:0008201	heparin binding	5/130	117/13889	0.00483236572126629	0.135745546170117	0.123930527588456	Ptn/Anxa4/Adamts8/Colq/Lipg	5
CST<WT	MF	GO:0098960	postsynaptic neurotransmitter receptor activity	3/123	39/13889	0.00490970687573064	0.0580981980294792	0.0501306912574602	Chrna4/Grin2b/Grm5	3
CST<WT	BP	GO:0032892	positive regulation of organic acid transport	3/127	38/13966	0.00491143938498074	0.0796726722070619	0.0679561539613226	Grin2b/Dpysl2/Syt4	3
CST<WT	BP	GO:0038179	neurotrophin signaling pathway	3/127	38/13966	0.00491143938498074	0.0796726722070619	0.0679561539613226	Rapgef2/Wasf1/Agtr2	3
WT<CST	BP	GO:0097484	dendrite extension	3/131	37/13966	0.00496510058761487	0.280007513598048	0.262880453733587	Syt2/Bdnf/Tmem108	3
CST<WT	BP	GO:0018119	peptidyl-cysteine S-nitrosylation	2/127	12/13966	0.00510143286406302	0.0796726722070619	0.0679561539613226	Atp2b4/Nos1ap	2
CST<WT	BP	GO:0031223	auditory behavior	2/127	12/13966	0.00510143286406302	0.0796726722070619	0.0679561539613226	Foxp2/Cntnap2	2
CST<WT	BP	GO:0046541	saliva secretion	2/127	12/13966	0.00510143286406302	0.0796726722070619	0.0679561539613226	Chrm3/Fgf10	2
CST<WT	BP	GO:0060601	lateral sprouting from an epithelium	2/127	12/13966	0.00510143286406302	0.0796726722070619	0.0679561539613226	Fgf10/Ar	2
CST<WT	BP	GO:0070572	positive regulation of neuron projection regeneration	2/127	12/13966	0.00510143286406302	0.0796726722070619	0.0679561539613226	Igf1r/Ntrk3	2
CST<WT	BP	GO:0086067	AV node cell to bundle of His cell communication	2/127	12/13966	0.00510143286406302	0.0796726722070619	0.0679561539613226	Cacnb2/Ryr2	2
CST<WT	BP	GO:1990138	neuron projection extension	6/127	174/13966	0.00512630311004342	0.0796726722070619	0.0679561539613226	Raph1/Ntrk3/Wasf1/Syt1/Dpysl2/Syt4	6
WT<CST	BP	GO:0002456	T cell mediated immunity	4/131	74/13966	0.00512633113099923	0.280007513598048	0.262880453733587	Crlf2/H60b/H2-D1/H2-T23	4
CST<WT	BP	GO:0051955	regulation of amino acid transport	3/127	39/13966	0.00528578769652489	0.0816247600059516	0.0696211712794641	Grin2b/Dpysl2/Syt4	3
WT<CST	BP	GO:0001913	T cell mediated cytotoxicity	3/131	38/13966	0.0053541449775549	0.280007513598048	0.262880453733587	H60b/H2-D1/H2-T23	3
WT<CST	BP	GO:0003416	endochondral bone growth	3/131	38/13966	0.0053541449775549	0.280007513598048	0.262880453733587	Ecm1/Col27a1/Vwa1	3
WT<CST	MF	GO:0042608	T cell receptor binding	2/130	12/13889	0.00539615661184249	0.138951032754944	0.12685701508542	H2-D1/H2-T23	2
WT<CST	BP	GO:0002428	antigen processing and presentation of peptide antigen via MHC class Ib	2/131	12/13966	0.00541880757354727	0.280007513598048	0.262880453733587	H2-D1/H2-T23	2
WT<CST	BP	GO:0016584	nucleosome positioning	2/131	12/13966	0.00541880757354727	0.280007513598048	0.262880453733587	Hist1h1e/Hist1h1c	2
WT<CST	BP	GO:2000345	regulation of hepatocyte proliferation	2/131	12/13966	0.00541880757354727	0.280007513598048	0.262880453733587	Ptn/Plau	2
WT<CST	BP	GO:0031099	regeneration	5/131	120/13966	0.00542594875916667	0.280007513598048	0.262880453733587	Bdnf/Serpine1/Ccnd1/Gpx1/Plau	5
CST<WT	MF	GO:0008528	G protein-coupled peptide receptor activity	4/123	80/13889	0.00551822893686594	0.0631525924743682	0.0544919330171717	Npy1r/Gpr83/Nmbr/Agtr2	4
CST<WT	BP	GO:0006936	muscle contraction	7/127	234/13966	0.00553592998186126	0.0848503765848233	0.0723724345518233	Myl1/Cacnb2/Met/Npy1r/Scn3b/Chrm3/Ryr2	7
CST<WT	BP	GO:0099173	postsynapse organization	6/127	177/13966	0.00556511394786305	0.0848503765848233	0.0723724345518233	Epha5/Grin2b/Shisa7/Igf1r/Ntrk3/Htr1a	6
CST<WT	BP	GO:0048588	developmental cell growth	7/127	235/13966	0.0056637623796399	0.0854721910335716	0.0729028060988537	Raph1/Ntrk3/Wasf1/Syt1/Dpysl2/Syt4/Agtr2	7
CST<WT	BP	GO:0086002	cardiac muscle cell action potential involved in contraction	3/127	40/13966	0.00567685785195992	0.0854721910335716	0.0729028060988537	Cacnb2/Scn3b/Ryr2	3
CST<WT	MF	GO:0016594	glycine binding	2/123	13/13889	0.00569262805402756	0.0631525924743682	0.0544919330171717	Grin2b/Glra3	2
WT<CST	CC	GO:0043204	perikaryon	5/134	121/14212	0.00574585634959809	0.0884861877838106	0.0842725597941053	Bdnf/Npy/Tmem100/Crhbp/Adcyap1	5
WT<CST	BP	GO:0002063	chondrocyte development	3/131	39/13966	0.00576102894846195	0.282434444198347	0.265158937654209	Ecm1/Col27a1/Vwa1	3
WT<CST	BP	GO:0098868	bone growth	3/131	39/13966	0.00576102894846195	0.282434444198347	0.265158937654209	Ecm1/Col27a1/Vwa1	3
CST<WT	BP	GO:0060079	excitatory postsynaptic potential	4/127	79/13966	0.00579403809763779	0.0859387717051501	0.0733007722656062	Chrna4/Met/Grin2b/Sez6	4
CST<WT	BP	GO:0015850	organic hydroxy compound transport	6/127	179/13966	0.00587254796473818	0.0859387717051501	0.0733007722656062	Fcer1g/Chrna4/Syt1/Htr1a/Syt4/Agtr2	6
CST<WT	BP	GO:0007216	G protein-coupled glutamate receptor signaling pathway	2/127	13/13966	0.00599323937171657	0.0859387717051501	0.0733007722656062	Grik3/Grm5	2
CST<WT	BP	GO:0017014	protein nitrosylation	2/127	13/13966	0.00599323937171657	0.0859387717051501	0.0733007722656062	Atp2b4/Nos1ap	2
CST<WT	BP	GO:0035112	genitalia morphogenesis	2/127	13/13966	0.00599323937171657	0.0859387717051501	0.0733007722656062	Fgf10/Ar	2
CST<WT	BP	GO:0048557	embryonic digestive tract morphogenesis	2/127	13/13966	0.00599323937171657	0.0859387717051501	0.0733007722656062	Sox11/Fgf10	2
CST<WT	BP	GO:0099550	trans-synaptic signaling, modulating synaptic transmission	2/127	13/13966	0.00599323937171657	0.0859387717051501	0.0733007722656062	Grm5/Syt4	2
CST<WT	BP	GO:2001212	regulation of vasculogenesis	2/127	13/13966	0.00599323937171657	0.0859387717051501	0.0733007722656062	Cd34/Rapgef2	2
CST<WT	MF	GO:0005544	calcium-dependent phospholipid binding	3/123	42/13889	0.00604992218659393	0.0633521827733956	0.0546641517777854	Pclo/Syt1/Syt4	3
CST<WT	MF	GO:0022890	inorganic cation transmembrane transporter activity	10/123	444/13889	0.00606753299801536	0.0633521827733956	0.0546641517777854	Atp2b4/Cacna1e/Cacnb2/Chrna4/Grik3/Grin2b/Scn3b/Slc24a4/Ryr2/Slc4a8	10
CST<WT	BP	GO:0018198	peptidyl-cysteine modification	3/127	41/13966	0.00608484520506047	0.0867360479230218	0.0739808024931675	Atp2b4/Nos1ap/Zdhhc9	3
WT<CST	BP	GO:0042737	drug catabolic process	4/131	78/13966	0.00617556115592601	0.295372571384656	0.277305685794983	Chil3/Ache/Amt/Gpx1	4
CST<WT	BP	GO:0006941	striated muscle contraction	5/127	128/13966	0.00624289656281824	0.0872297095389627	0.0744018671298661	Myl1/Cacnb2/Met/Scn3b/Ryr2	5
CST<WT	BP	GO:0033555	multicellular organismal response to stress	4/127	81/13966	0.00632744277887165	0.0872297095389627	0.0744018671298661	Cacna1e/Grin2b/Prkcg/Htr1a	4
CST<WT	BP	GO:0060560	developmental growth involved in morphogenesis	7/127	240/13966	0.00633643171794691	0.0872297095389627	0.0744018671298661	Raph1/Ntrk3/Wasf1/Syt1/Fgf10/Dpysl2/Syt4	7
WT<CST	BP	GO:0031936	negative regulation of chromatin silencing	2/131	13/13966	0.00636489117610145	0.297179799912737	0.279002372606552	Hist1h1e/Hist1h1c	2
CST<WT	BP	GO:0003254	regulation of membrane depolarization	3/127	42/13966	0.00650993561037422	0.0872297095389627	0.0744018671298661	Scn3b/Ank3/Fhl1	3
WT<CST	MF	GO:0017046	peptide hormone binding	3/130	41/13889	0.00658960626610001	0.145201059258743	0.132563051886708	Hcrtr1/Hcrtr2/Crhbp	3
CST<WT	MF	GO:0005003	ephrin receptor activity	2/123	14/13889	0.00660311015541115	0.0669744030048845	0.057789625721042	Epha5/Ntrk3	2
CST<WT	BP	GO:0060359	response to ammonium ion	4/127	82/13966	0.00660597397168834	0.0872297095389627	0.0744018671298661	Chrna4/Prkcg/Chrm3/Mapk1	4
WT<CST	BP	GO:0031343	positive regulation of cell killing	3/131	41/13966	0.00662915461570516	0.29894184629211	0.280656640900132	H60b/H2-D1/H2-T23	3
CST<WT	BP	GO:0071248	cellular response to metal ion	5/127	130/13966	0.00665847242513156	0.0872297095389627	0.0744018671298661	Glra3/Ank3/Syt1/Mapk1/Syt4	5
WT<CST	BP	GO:0023061	signal release	10/131	425/13966	0.00670751720390253	0.29894184629211	0.280656640900132	Syt2/Vgf/Cadps2/Pde4c/Sphk1/Chga/Crhbp/Adcyap1/Syt12/Apln	10
WT<CST	MF	GO:0019838	growth factor binding	5/130	127/13889	0.0068111552907109	0.145201059258743	0.132563051886708	Crlf2/Ptn/Htra4/Kazald1/Srpx2	5
CST<WT	BP	GO:0001666	response to hypoxia	6/127	185/13966	0.00686936873734779	0.0872297095389627	0.0744018671298661	Cd34/Chrna4/Cpeb2/Grin2b/Ryr2/Vegfd	6
CST<WT	BP	GO:0007411	axon guidance	6/127	185/13966	0.00686936873734779	0.0872297095389627	0.0744018671298661	Epha5/Chl1/Ank3/Etv1/Dpysl2/Matn2	6
CST<WT	BP	GO:0046717	acid secretion	4/127	83/13966	0.00689252105350982	0.0872297095389627	0.0744018671298661	Grin2b/Dpysl2/Syt4/Agtr2	4
CST<WT	BP	GO:2001237	negative regulation of extrinsic apoptotic signaling pathway	4/127	83/13966	0.00689252105350982	0.0872297095389627	0.0744018671298661	Pak7/Fgf10/Faim2/Ar	4
CST<WT	CC	GO:0097449	astrocyte projection	2/129	14/14212	0.00692687032853922	0.0446948061674793	0.0352419718469539	Grm5/Syt4	2
CST<WT	BP	GO:0001820	serotonin secretion	2/127	14/13966	0.00695070792711586	0.0872297095389627	0.0744018671298661	Fcer1g/Htr1a	2
CST<WT	BP	GO:0007530	sex determination	2/127	14/13966	0.00695070792711586	0.0872297095389627	0.0744018671298661	Igf1r/Ar	2
CST<WT	BP	GO:0016322	neuron remodeling	2/127	14/13966	0.00695070792711586	0.0872297095389627	0.0744018671298661	Adgrb3/Gnaq	2
CST<WT	BP	GO:0045019	negative regulation of nitric oxide biosynthetic process	2/127	14/13966	0.00695070792711586	0.0872297095389627	0.0744018671298661	Atp2b4/Cd34	2
CST<WT	BP	GO:0050930	induction of positive chemotaxis	2/127	14/13966	0.00695070792711586	0.0872297095389627	0.0744018671298661	Fgf10/Vegfd	2
CST<WT	BP	GO:0070885	negative regulation of calcineurin-NFAT signaling cascade	2/127	14/13966	0.00695070792711586	0.0872297095389627	0.0744018671298661	Atp2b4/Dyrk2	2
CST<WT	BP	GO:0106057	negative regulation of calcineurin-mediated signaling	2/127	14/13966	0.00695070792711586	0.0872297095389627	0.0744018671298661	Atp2b4/Dyrk2	2
CST<WT	BP	GO:1901841	regulation of high voltage-gated calcium channel activity	2/127	14/13966	0.00695070792711586	0.0872297095389627	0.0744018671298661	Nos1ap/Cacnb2	2
CST<WT	BP	GO:1904406	negative regulation of nitric oxide metabolic process	2/127	14/13966	0.00695070792711586	0.0872297095389627	0.0744018671298661	Atp2b4/Cd34	2
CST<WT	BP	GO:2000479	regulation of cAMP-dependent protein kinase activity	2/127	14/13966	0.00695070792711586	0.0872297095389627	0.0744018671298661	Atp2b4/Rapgef2	2
CST<WT	BP	GO:0030850	prostate gland development	3/127	43/13966	0.00695230561705306	0.0872297095389627	0.0744018671298661	Igf1r/Fgf10/Ar	3
CST<WT	BP	GO:0042551	neuron maturation	3/127	43/13966	0.00695230561705306	0.0872297095389627	0.0744018671298661	Adgrb3/Cntnap2/Gnaq	3
CST<WT	BP	GO:0071242	cellular response to ammonium ion	3/127	43/13966	0.00695230561705306	0.0872297095389627	0.0744018671298661	Chrna4/Chrm3/Mapk1	3
CST<WT	BP	GO:0097485	neuron projection guidance	6/127	186/13966	0.00704673328305102	0.0879563755381861	0.0750216709490897	Epha5/Chl1/Ank3/Etv1/Dpysl2/Matn2	6
WT<CST	MF	GO:0005544	calcium-dependent phospholipid binding	3/130	42/13889	0.00704859510964774	0.145201059258743	0.132563051886708	Syt2/Anxa4/Syt12	3
WT<CST	BP	GO:0033555	multicellular organismal response to stress	4/131	81/13966	0.00704999570812811	0.302283427475876	0.28379382949371	Bdnf/Kcnip3/Vwa1/Adcyap1	4
WT<CST	BP	GO:0051590	positive regulation of neurotransmitter transport	3/131	42/13966	0.00709078922176965	0.302283427475876	0.28379382949371	Syt2/Sphk1/Apln	3
WT<CST	BP	GO:0032656	regulation of interleukin-13 production	2/131	14/13966	0.00738033932573603	0.304029161114478	0.285432782838628	Irf4/H2-T23	2
CST<WT	MF	GO:0001653	peptide receptor activity	4/123	87/13889	0.00740813911216105	0.0730524829115882	0.0630341661297914	Npy1r/Gpr83/Nmbr/Agtr2	4
CST<WT	BP	GO:0035176	social behavior	3/127	44/13966	0.00741212265966013	0.0911010381995982	0.0777038852398312	Cntnap2/Grp/Vps13a	3
CST<WT	BP	GO:0048645	animal organ formation	3/127	44/13966	0.00741212265966013	0.0911010381995982	0.0777038852398312	Fgf10/Mapk1/Ar	3
CST<WT	BP	GO:0051703	intraspecies interaction between organisms	3/127	44/13966	0.00741212265966013	0.0911010381995982	0.0777038852398312	Cntnap2/Grp/Vps13a	3
CST<WT	BP	GO:1901699	cellular response to nitrogen compound	10/127	446/13966	0.007511205758948	0.0918502267680494	0.0783428995002217	Atp2b4/Chrna4/Rapgef2/Cpeb2/Igf1r/Grm5/Glra3/Chrm3/Ryr2/Mapk1	10
CST<WT	BP	GO:0036293	response to decreased oxygen levels	6/127	189/13966	0.0075987579652674	0.0924515552440867	0.078855797704423	Cd34/Chrna4/Cpeb2/Grin2b/Ryr2/Vegfd	6
CST<WT	BP	GO:0001662	behavioral fear response	3/127	45/13966	0.00788954524599361	0.0936876529138394	0.0799101170993924	Cacna1e/Grin2b/Htr1a	3
CST<WT	BP	GO:0002209	behavioral defense response	3/127	45/13966	0.00788954524599361	0.0936876529138394	0.0799101170993924	Cacna1e/Grin2b/Htr1a	3
WT<CST	MF	GO:0042562	hormone binding	4/130	84/13889	0.00794249593184769	0.153389452683808	0.140038744061525	Hcrtr1/Ache/Hcrtr2/Crhbp	4
CST<WT	BP	GO:0001759	organ induction	2/127	15/13966	0.00797258980794399	0.0936876529138394	0.0799101170993924	Fgf10/Ar	2
CST<WT	BP	GO:0030539	male genitalia development	2/127	15/13966	0.00797258980794399	0.0936876529138394	0.0799101170993924	Fgf10/Ar	2
CST<WT	BP	GO:0051127	positive regulation of actin nucleation	2/127	15/13966	0.00797258980794399	0.0936876529138394	0.0799101170993924	Wasf1/Wipf2	2
CST<WT	BP	GO:0090036	regulation of protein kinase C signaling	2/127	15/13966	0.00797258980794399	0.0936876529138394	0.0799101170993924	Sez6l/Sez6	2
CST<WT	BP	GO:0098962	regulation of postsynaptic neurotransmitter receptor activity	2/127	15/13966	0.00797258980794399	0.0936876529138394	0.0799101170993924	Chrna4/Shisa7	2
WT<CST	BP	GO:0008585	female gonad development	4/131	84/13966	0.00800262823194154	0.304029161114478	0.285432782838628	Col9a3/Vgf/Serpine1/Adcyap1	4
CST<WT	BP	GO:0021700	developmental maturation	7/127	251/13966	0.0080244823523686	0.0938396989653202	0.0800398035351227	Adgrb3/Rere/Sez6l/Cntnap2/Sez6/Syt4/Gnaq	7
WT<CST	BP	GO:0042246	tissue regeneration	3/131	44/13966	0.00807010685727617	0.304029161114478	0.285432782838628	Serpine1/Gpx1/Plau	3
CST<WT	MF	GO:0051018	protein kinase A binding	3/123	47/13889	0.00827623685494124	0.0794071373920038	0.0685173520565548	Sphkap/Wasf1/Ryr2	3
CST<WT	BP	GO:0016049	cell growth	10/127	453/13966	0.00833671495190521	0.0966449667416307	0.0824325337351874	Raph1/Pak7/Ntrk3/Wasf1/Syt1/Dpysl2/Crim1/Syt4/Agtr2/Fhl1	10
CST<WT	BP	GO:0015872	dopamine transport	3/127	46/13966	0.00838472314196796	0.0966449667416307	0.0824325337351874	Chrna4/Syt1/Syt4	3
CST<WT	BP	GO:0035272	exocrine system development	3/127	46/13966	0.00838472314196796	0.0966449667416307	0.0824325337351874	Met/Igf1r/Fgf10	3
CST<WT	CC	GO:0005901	caveola	4/129	88/14212	0.0083999151406602	0.0529390000725329	0.0417425403562796	Nos1ap/Igf1r/Mapk1/Gnaq	4
CST<WT	BP	GO:0014897	striated muscle hypertrophy	4/127	88/13966	0.00844879212593983	0.0969197153875669	0.0826668783450353	Atp2b4/Ryr2/Agtr2/Ar	4
WT<CST	BP	GO:0002475	antigen processing and presentation via MHC class Ib	2/131	15/13966	0.00846378783498523	0.304029161114478	0.285432782838628	H2-D1/H2-T23	2
WT<CST	BP	GO:0032616	interleukin-13 production	2/131	15/13966	0.00846378783498523	0.304029161114478	0.285432782838628	Irf4/H2-T23	2
WT<CST	BP	GO:0060055	angiogenesis involved in wound healing	2/131	15/13966	0.00846378783498523	0.304029161114478	0.285432782838628	Serpine1/Gpx1	2
WT<CST	BP	GO:0060253	negative regulation of glial cell proliferation	2/131	15/13966	0.00846378783498523	0.304029161114478	0.285432782838628	Ptn/Adcyap1	2
WT<CST	CC	GO:0005614	interstitial matrix	2/134	15/14212	0.00854963910522107	0.123435414581629	0.11755753769679	Vwa1/Kazald1	2
CST<WT	MF	GO:0015464	acetylcholine receptor activity	2/123	16/13889	0.00860739080392021	0.0804111509313599	0.0693836765634565	Chrna4/Chrm3	2
WT<CST	BP	GO:0007631	feeding behavior	4/131	86/13966	0.00868251004534944	0.304029161114478	0.285432782838628	Bdnf/Hcrtr1/Hcrtr2/Apln	4
WT<CST	BP	GO:0006954	inflammatory response	10/131	442/13966	0.0087272347301396	0.304029161114478	0.285432782838628	Ecm1/Chil3/Crlf2/Serpine1/Gpx1/Serpinf1/Sphk1/Serpina3n/Crhbp/Adcyap1	10
CST<WT	BP	GO:0099565	chemical synaptic transmission, postsynaptic	4/127	89/13966	0.0087853920189398	0.099945631404336	0.0852478086566882	Chrna4/Met/Grin2b/Sez6	4
CST<WT	BP	GO:0070374	positive regulation of ERK1 and ERK2 cascade	6/127	195/13966	0.0087955474710333	0.099945631404336	0.0852478086566882	Rapgef2/Epha5/Met/Igf1r/Ntrk3/Fgf10	6
CST<WT	BP	GO:2001236	regulation of extrinsic apoptotic signaling pathway	5/127	140/13966	0.00903051054229943	0.100091223420571	0.0853719901758555	Pak7/Fgf10/Faim2/Agtr2/Ar	5
WT<CST	BP	GO:0046545	development of primary female sexual characteristics	4/131	87/13966	0.00903618118046217	0.304029161114478	0.285432782838628	Col9a3/Vgf/Serpine1/Adcyap1	4
CST<WT	BP	GO:0010996	response to auditory stimulus	2/127	16/13966	0.00905765326097319	0.100091223420571	0.0853719901758555	Foxp2/Cntnap2	2
CST<WT	BP	GO:0030878	thyroid gland development	2/127	16/13966	0.00905765326097319	0.100091223420571	0.0853719901758555	Fgf10/Mapk1	2
CST<WT	BP	GO:0033604	negative regulation of catecholamine secretion	2/127	16/13966	0.00905765326097319	0.100091223420571	0.0853719901758555	Syt4/Agtr2	2
CST<WT	BP	GO:0035584	calcium-mediated signaling using intracellular calcium source	2/127	16/13966	0.00905765326097319	0.100091223420571	0.0853719901758555	Grm5/Ryr2	2
CST<WT	BP	GO:0051386	regulation of neurotrophin TRK receptor signaling pathway	2/127	16/13966	0.00905765326097319	0.100091223420571	0.0853719901758555	Wasf1/Agtr2	2
CST<WT	BP	GO:0014896	muscle hypertrophy	4/127	90/13966	0.00913064621118751	0.100437108323063	0.0856670098737708	Atp2b4/Ryr2/Agtr2/Ar	4
CST<WT	BP	GO:0048167	regulation of synaptic plasticity	6/127	197/13966	0.00922294230601653	0.100991218250881	0.0861396334035611	Rapgef2/Grin2b/Shisa7/Grm5/Mapk1/Syt4	6
CST<WT	MF	GO:0015081	sodium ion transmembrane transporter activity	4/123	93/13889	0.00933264273703582	0.0849509787601979	0.0733009186633583	Grik3/Scn3b/Slc24a4/Slc4a8	4
WT<CST	BP	GO:0003013	circulatory system process	9/131	379/13966	0.00941016710723595	0.304029161114478	0.285432782838628	Ddah1/Npy/Gpx1/Ramp3/Myl4/Chga/Adcyap1/Apln/Nox1	9
CST<WT	CC	GO:0043235	receptor complex	8/129	324/14212	0.00942169987931271	0.0580291060748578	0.0457561022847005	Chrna4/Grik3/Epha5/Met/Grin2b/Shisa7/Igf1r/Ntrk3	8
CST<WT	BP	GO:0006584	catecholamine metabolic process	3/127	48/13966	0.00942890130608533	0.101857503346904	0.0868785241891837	Moxd1/Htr1a/Agtr2	3
CST<WT	BP	GO:0009712	catechol-containing compound metabolic process	3/127	48/13966	0.00942890130608533	0.101857503346904	0.0868785241891837	Moxd1/Htr1a/Agtr2	3
CST<WT	BP	GO:1903307	positive regulation of regulated secretory pathway	3/127	48/13966	0.00942890130608533	0.101857503346904	0.0868785241891837	Fcer1g/Syt1/Syt4	3
WT<CST	MF	GO:0042605	peptide antigen binding	2/130	16/13889	0.00957422884624363	0.166496427713394	0.15200491441727	H2-D1/H2-T23	2
WT<CST	BP	GO:0002483	antigen processing and presentation of endogenous peptide antigen	2/131	16/13966	0.00961389166483171	0.304029161114478	0.285432782838628	H2-D1/H2-T23	2
WT<CST	BP	GO:0031639	plasminogen activation	2/131	16/13966	0.00961389166483171	0.304029161114478	0.285432782838628	Serpine1/Plau	2
WT<CST	BP	GO:0033599	regulation of mammary gland epithelial cell proliferation	2/131	16/13966	0.00961389166483171	0.304029161114478	0.285432782838628	Ccnd1/Gpx1	2
WT<CST	BP	GO:0048305	immunoglobulin secretion	2/131	16/13966	0.00961389166483171	0.304029161114478	0.285432782838628	Crlf2/H2-T23	2
WT<CST	BP	GO:0071467	cellular response to pH	2/131	16/13966	0.00961389166483171	0.304029161114478	0.285432782838628	Slc38a3/Nox1	2
WT<CST	MF	GO:0004866	endopeptidase inhibitor activity	4/130	89/13889	0.0096988210318482	0.166496427713394	0.15200491441727	Serpine1/Serpinf1/Papln/Serpina3n	4
CST<WT	BP	GO:0042596	fear response	3/127	49/13966	0.0099781590201664	0.104313552952343	0.0889733916073382	Cacna1e/Grin2b/Htr1a	3
CST<WT	BP	GO:0042593	glucose homeostasis	6/127	201/13966	0.0101220248647753	0.104313552952343	0.0889733916073382	Cacna1e/Epha5/Hectd4/Met/Igf1r/Gpr68	6
CST<WT	BP	GO:0070482	response to oxygen levels	6/127	201/13966	0.0101220248647753	0.104313552952343	0.0889733916073382	Cd34/Chrna4/Cpeb2/Grin2b/Ryr2/Vegfd	6
CST<WT	BP	GO:0007409	axonogenesis	9/127	396/13966	0.0101588792276811	0.104313552952343	0.0889733916073382	Raph1/Epha5/Chl1/Igf1r/Ntrk3/Ank3/Etv1/Dpysl2/Matn2	9
CST<WT	CC	GO:0033270	paranode region of axon	2/129	17/14212	0.0101699737115881	0.0607683957546927	0.0479160393793071	Cntnap2/Ank3	2
CST<WT	BP	GO:0010976	positive regulation of neuron projection development	8/127	328/13966	0.0101884040088497	0.104313552952343	0.0889733916073382	Cbfa2t2/Rapgef2/Met/Igf1r/Ntrk3/Syt1/Sez6/Syt4	8
CST<WT	BP	GO:0006448	regulation of translational elongation	2/127	17/13966	0.0102046833006867	0.104313552952343	0.0889733916073382	Cpeb2/Grm5	2
CST<WT	BP	GO:0006837	serotonin transport	2/127	17/13966	0.0102046833006867	0.104313552952343	0.0889733916073382	Fcer1g/Htr1a	2
CST<WT	BP	GO:0048266	behavioral response to pain	2/127	17/13966	0.0102046833006867	0.104313552952343	0.0889733916073382	Cacna1e/Grin2b	2
CST<WT	BP	GO:0048791	calcium ion-regulated exocytosis of neurotransmitter	2/127	17/13966	0.0102046833006867	0.104313552952343	0.0889733916073382	Syt1/Syt4	2
CST<WT	BP	GO:0051481	negative regulation of cytosolic calcium ion concentration	2/127	17/13966	0.0102046833006867	0.104313552952343	0.0889733916073382	Npy1r/Ryr2	2
CST<WT	BP	GO:0060572	morphogenesis of an epithelial bud	2/127	17/13966	0.0102046833006867	0.104313552952343	0.0889733916073382	Fgf10/Ar	2
CST<WT	BP	GO:0099171	presynaptic modulation of chemical synaptic transmission	2/127	17/13966	0.0102046833006867	0.104313552952343	0.0889733916073382	Prkcg/Syt1	2
CST<WT	BP	GO:0007189	adenylate cyclase-activating G protein-coupled receptor signaling pathway	4/127	93/13966	0.0102191774581789	0.104313552952343	0.0889733916073382	Adgrb3/Atp2b4/Rapgef2/Gnaq	4
CST<WT	BP	GO:0033500	carbohydrate homeostasis	6/127	202/13966	0.0103562147986025	0.104909495068734	0.0894816955601449	Cacna1e/Epha5/Hectd4/Met/Igf1r/Gpr68	6
CST<WT	MF	GO:0030276	clathrin binding	3/123	51/13889	0.0103611580700328	0.091955277871541	0.0793446578520932	Syt1/Nsg2/Syt4	3
CST<WT	BP	GO:0006816	calcium ion transport	8/127	329/13966	0.0103646574621664	0.104909495068734	0.0894816955601449	Atp2b4/Cacna1e/Nos1ap/Cacnb2/Chrna4/Grin2b/Slc24a4/Ryr2	8
CST<WT	CC	GO:0045178	basal part of cell	3/129	50/14212	0.0104964429161292	0.0607683957546927	0.0479160393793071	Cd34/Met/Ank3	3
CST<WT	CC	GO:0098839	postsynaptic density membrane	4/129	94/14212	0.010539168267419	0.0607683957546927	0.0479160393793071	Grin2b/Grm5/Gsg1l/Chrm3	4
WT<CST	BP	GO:1905477	positive regulation of protein localization to membrane	4/131	91/13966	0.010544570384976	0.304029161114478	0.285432782838628	Ptn/Ramp3/Myo1c/Stac2	4
WT<CST	BP	GO:0002717	positive regulation of natural killer cell mediated immunity	2/131	17/13966	0.0108293246900022	0.304029161114478	0.285432782838628	H60b/H2-T23	2
WT<CST	BP	GO:0032753	positive regulation of interleukin-4 production	2/131	17/13966	0.0108293246900022	0.304029161114478	0.285432782838628	Irf4/H2-T23	2
WT<CST	BP	GO:0040037	negative regulation of fibroblast growth factor receptor signaling pathway	2/131	17/13966	0.0108293246900022	0.304029161114478	0.285432782838628	Creb3l1/Apln	2
WT<CST	BP	GO:0048266	behavioral response to pain	2/131	17/13966	0.0108293246900022	0.304029161114478	0.285432782838628	Kcnip3/Vwa1	2
WT<CST	BP	GO:0080182	histone H3-K4 trimethylation	2/131	17/13966	0.0108293246900022	0.304029161114478	0.285432782838628	Hist1h1e/Hist1h1c	2
WT<CST	BP	GO:0090280	positive regulation of calcium ion import	2/131	17/13966	0.0108293246900022	0.304029161114478	0.285432782838628	Serpine1/Ramp3	2
CST<WT	MF	GO:0004970	ionotropic glutamate receptor activity	2/123	18/13889	0.0108485534449733	0.0939325969015978	0.0810508100766938	Grik3/Grin2b	2
WT<CST	BP	GO:0001910	regulation of leukocyte mediated cytotoxicity	3/131	49/13966	0.0108526472605882	0.304029161114478	0.285432782838628	H60b/H2-D1/H2-T23	3
CST<WT	BP	GO:1905330	regulation of morphogenesis of an epithelium	4/127	95/13966	0.0109896539995635	0.110770194497693	0.0944805311920196	Met/Fgf10/Agtr2/Ar	4
CST<WT	BP	GO:0061337	cardiac conduction	3/127	51/13966	0.011131594831753	0.11173338312372	0.0953020750507973	Cacnb2/Scn3b/Ryr2	3
WT<CST	MF	GO:0017171	serine hydrolase activity	4/130	93/13889	0.0112725536123618	0.174160953310989	0.159002335163839	Pamr1/Ache/Htra4/Plau	4
WT<CST	MF	GO:0030414	peptidase inhibitor activity	4/130	93/13889	0.0112725536123618	0.174160953310989	0.159002335163839	Serpine1/Serpinf1/Papln/Serpina3n	4
CST<WT	BP	GO:0071241	cellular response to inorganic substance	5/127	148/13966	0.0113062495089795	0.113015581191417	0.0963957154030483	Glra3/Ank3/Syt1/Mapk1/Syt4	5
CST<WT	BP	GO:0048172	regulation of short-term neuronal synaptic plasticity	2/127	18/13966	0.0114124815101148	0.113272650271492	0.0966149803718303	Shisa7/Syt4	2
CST<WT	BP	GO:0016358	dendrite development	7/127	269/13966	0.0114729429278734	0.113272650271492	0.0966149803718303	Adgrb3/Rapgef2/Rere/Epha5/Met/Sez6/Matn2	7
CST<WT	BP	GO:0045666	positive regulation of neuron differentiation	9/127	404/13966	0.0114730289191548	0.113272650271492	0.0966149803718303	Cbfa2t2/Rapgef2/Met/Igf1r/Ntrk3/Syt1/Sez6/Sox11/Syt4	9
CST<WT	BP	GO:0043954	cellular component maintenance	3/127	52/13966	0.0117359826960411	0.115053573414331	0.0981340041968815	Adgrb3/Grin2b/Igf1r	3
WT<CST	BP	GO:0051952	regulation of amine transport	4/131	94/13966	0.0117767300588116	0.30758115041982	0.28876750964023	Syt2/Slc38a3/Chga/Syt12	4
CST<WT	BP	GO:0030048	actin filament-based movement	4/127	97/13966	0.0117966926663925	0.115053573414331	0.0981340041968815	Cacnb2/Scn3b/Wipf2/Ryr2	4
CST<WT	BP	GO:2001023	regulation of response to drug	4/127	97/13966	0.0117966926663925	0.115053573414331	0.0981340041968815	Chrna4/Met/Syt1/Syt4	4
WT<CST	CC	GO:0031594	neuromuscular junction	4/134	94/14212	0.011990694747865	0.156956454301832	0.149482337430317	Syt2/Ache/Ptn/Colq	4
CST<WT	MF	GO:0070405	ammonium ion binding	3/123	54/13889	0.0121070346040799	0.102333268677342	0.0882994253079511	Chrna4/Chrm3/Htr1a	3
WT<CST	BP	GO:0019883	antigen processing and presentation of endogenous antigen	2/131	18/13966	0.0121087794669287	0.30758115041982	0.28876750964023	H2-D1/H2-T23	2
WT<CST	BP	GO:0071392	cellular response to estradiol stimulus	2/131	18/13966	0.0121087794669287	0.30758115041982	0.28876750964023	Ramp3/Crhbp	2
WT<CST	BP	GO:0072574	hepatocyte proliferation	2/131	18/13966	0.0121087794669287	0.30758115041982	0.28876750964023	Ptn/Plau	2
WT<CST	BP	GO:0072575	epithelial cell proliferation involved in liver morphogenesis	2/131	18/13966	0.0121087794669287	0.30758115041982	0.28876750964023	Ptn/Plau	2
CST<WT	CC	GO:0098802	plasma membrane receptor complex	5/129	151/14212	0.0121713770901939	0.0687175664883862	0.0541839813445034	Chrna4/Grik3/Grin2b/Shisa7/Igf1r	5
WT<CST	CC	GO:0042611	MHC protein complex	2/134	18/14212	0.0122303730624804	0.156956454301832	0.149482337430317	H2-D1/H2-T23	2
CST<WT	BP	GO:0051291	protein heterooligomerization	5/127	151/13966	0.0122520836621389	0.118556575105923	0.101121860831864	Chrna4/Grin2b/Igf1r/Syt1/Gnaq	5
CST<WT	BP	GO:0007600	sensory perception	8/127	339/13966	0.0122542910757056	0.118556575105923	0.101121860831864	Cacna1e/Cacnb2/Chrna4/Grin2b/Crym/Npy1r/Slc24a4/Mapk1	8
CST<WT	BP	GO:1903793	positive regulation of anion transport	3/127	53/13966	0.0123589443889026	0.119090788131465	0.101577513461633	Grin2b/Dpysl2/Syt4	3
WT<CST	BP	GO:0001659	temperature homeostasis	5/131	147/13966	0.0124595264076097	0.30758115041982	0.28876750964023	Ache/Gpx1/Irf4/Adcyap1/Apln	5
WT<CST	MF	GO:0061135	endopeptidase regulator activity	4/130	96/13889	0.0125548771628229	0.179972623367707	0.164308169179171	Serpine1/Serpinf1/Papln/Serpina3n	4
CST<WT	CC	GO:0034706	sodium channel complex	2/129	19/14212	0.0126369749855511	0.0698902085935584	0.0551086127189449	Grik3/Scn3b	2
CST<WT	BP	GO:0010959	regulation of metal ion transport	8/127	341/13966	0.0126608255699313	0.12121347943596	0.103388045644183	Atp2b4/Nos1ap/Cacnb2/Scn3b/Ank3/Ryr2/Gnaq/Fhl1	8
CST<WT	BP	GO:0003338	metanephros morphogenesis	2/127	19/13966	0.0126798658438614	0.12121347943596	0.103388045644183	Fgf10/Agtr2	2
WT<CST	BP	GO:0045766	positive regulation of angiogenesis	5/131	148/13966	0.0128007342954302	0.30758115041982	0.28876750964023	Ecm1/Ddah1/Serpine1/Sphk1/Srpx2	5
CST<WT	BP	GO:0019722	calcium-mediated signaling	5/127	153/13966	0.0129116793547627	0.122817112277153	0.104755851156847	Atp2b4/Ksr2/Grm5/Dyrk2/Ryr2	5
CST<WT	CC	GO:0008328	ionotropic glutamate receptor complex	3/129	54/14212	0.0129403598846901	0.0700506192922397	0.0552350969754308	Grik3/Grin2b/Shisa7	3
CST<WT	BP	GO:0015800	acidic amino acid transport	3/127	54/13966	0.0130005660567347	0.122817112277153	0.104755851156847	Grin2b/Dpysl2/Syt4	3
CST<WT	BP	GO:0099601	regulation of neurotransmitter receptor activity	3/127	54/13966	0.0130005660567347	0.122817112277153	0.104755851156847	Chrna4/Shisa7/Gsg1l	3
WT<CST	BP	GO:0001889	liver development	4/131	97/13966	0.0130978518649165	0.30758115041982	0.28876750964023	Ptn/Ccnd1/Klf1/Plau	4
CST<WT	MF	GO:0004993	G protein-coupled serotonin receptor activity	2/123	20/13889	0.0133177589594899	0.10506232068042	0.0906542188821419	Chrm3/Htr1a	2
CST<WT	MF	GO:0050998	nitric-oxide synthase binding	2/123	20/13889	0.0133177589594899	0.10506232068042	0.0906542188821419	Atp2b4/Nos1ap	2
CST<WT	MF	GO:0099589	serotonin receptor activity	2/123	20/13889	0.0133177589594899	0.10506232068042	0.0906542188821419	Chrm3/Htr1a	2
WT<CST	MF	GO:0050840	extracellular matrix binding	3/130	53/13889	0.0133532813594307	0.179972623367707	0.164308169179171	Ecm1/Ache/Itga9	3
WT<CST	MF	GO:0031492	nucleosomal DNA binding	2/130	19/13889	0.0133960205095704	0.179972623367707	0.164308169179171	Hist1h1e/Hist1h1c	2
WT<CST	CC	GO:0032993	protein-DNA complex	5/134	149/14212	0.0134311801165504	0.163294874048587	0.155518927665321	Kcnip3/Hist1h4k/Hist1h1e/Hist1h1c/Irf4	5
WT<CST	BP	GO:0002474	antigen processing and presentation of peptide antigen via MHC class I	2/131	19/13966	0.0134509670043461	0.30758115041982	0.28876750964023	H2-D1/H2-T23	2
WT<CST	BP	GO:0002861	regulation of inflammatory response to antigenic stimulus	2/131	19/13966	0.0134509670043461	0.30758115041982	0.28876750964023	Gpx1/Adcyap1	2
WT<CST	BP	GO:0003433	chondrocyte development involved in endochondral bone morphogenesis	2/131	19/13966	0.0134509670043461	0.30758115041982	0.28876750964023	Col27a1/Vwa1	2
WT<CST	BP	GO:0070734	histone H3-K27 methylation	2/131	19/13966	0.0134509670043461	0.30758115041982	0.28876750964023	Hist1h1e/Hist1h1c	2
WT<CST	BP	GO:0008406	gonad development	5/131	150/13966	0.0135020402275715	0.30758115041982	0.28876750964023	Col9a3/Vgf/Serpine1/Ccnd1/Adcyap1	5
CST<WT	BP	GO:0055123	digestive system development	4/127	101/13966	0.0135228194425088	0.127251843894545	0.10853841920961	Cbfa2t2/Igf1r/Sox11/Fgf10	4
WT<CST	BP	GO:0015837	amine transport	4/131	98/13966	0.0135583609378991	0.30758115041982	0.28876750964023	Syt2/Slc38a3/Chga/Syt12	4
WT<CST	BP	GO:0046660	female sex differentiation	4/131	98/13966	0.0135583609378991	0.30758115041982	0.28876750964023	Col9a3/Vgf/Serpine1/Adcyap1	4
CST<WT	CC	GO:0098878	neurotransmitter receptor complex	3/129	55/14212	0.0135977939560313	0.0700506192922397	0.0552350969754308	Grik3/Grin2b/Shisa7	3
WT<CST	BP	GO:0030072	peptide hormone secretion	6/131	208/13966	0.0136412139204821	0.30758115041982	0.28876750964023	Vgf/Pde4c/Chga/Crhbp/Adcyap1/Apln	6
WT<CST	BP	GO:0048732	gland development	8/131	335/13966	0.0136458745979217	0.30758115041982	0.28876750964023	Rap1gap/Ptn/Ccnd1/Klf1/Gpx1/Serpinf1/Plau/Adcyap1	8
CST<WT	BP	GO:0007218	neuropeptide signaling pathway	3/127	55/13966	0.01366092664199	0.127554931319977	0.10879693514959	Rapgef2/Glra3/Grp	3
CST<WT	BP	GO:1902305	regulation of sodium ion transmembrane transport	3/127	55/13966	0.01366092664199	0.127554931319977	0.10879693514959	Atp2b4/Scn3b/Ank3	3
CST<WT	CC	GO:0033017	sarcoplasmic reticulum membrane	2/129	20/14212	0.0139584259844315	0.0700506192922397	0.0552350969754308	Nos1ap/Ryr2	2
CST<WT	CC	GO:0043083	synaptic cleft	2/129	20/14212	0.0139584259844315	0.0700506192922397	0.0552350969754308	Adgrb3/Grin2b	2
CST<WT	CC	GO:0043194	axon initial segment	2/129	20/14212	0.0139584259844315	0.0700506192922397	0.0552350969754308	Nav1/Ank3	2
CST<WT	BP	GO:0010092	specification of animal organ identity	2/127	20/13966	0.0140056704332986	0.128287680889035	0.109421927899935	Fgf10/Ar	2
CST<WT	BP	GO:0095500	acetylcholine receptor signaling pathway	2/127	20/13966	0.0140056704332986	0.128287680889035	0.109421927899935	Chrna4/Chrm3	2
CST<WT	BP	GO:1903831	signal transduction involved in cellular response to ammonium ion	2/127	20/13966	0.0140056704332986	0.128287680889035	0.109421927899935	Chrna4/Chrm3	2
CST<WT	BP	GO:1905144	response to acetylcholine	2/127	20/13966	0.0140056704332986	0.128287680889035	0.109421927899935	Chrna4/Chrm3	2
CST<WT	BP	GO:1905145	cellular response to acetylcholine	2/127	20/13966	0.0140056704332986	0.128287680889035	0.109421927899935	Chrna4/Chrm3	2
WT<CST	BP	GO:0030968	endoplasmic reticulum unfolded protein response	3/131	54/13966	0.0141253223799972	0.307775079857495	0.28894957710661	Bok/Creb3l1/Ccnd1	3
WT<CST	BP	GO:0090278	negative regulation of peptide hormone secretion	3/131	54/13966	0.0141253223799972	0.307775079857495	0.28894957710661	Pde4c/Chga/Crhbp	3
WT<CST	BP	GO:0099601	regulation of neurotransmitter receptor activity	3/131	54/13966	0.0141253223799972	0.307775079857495	0.28894957710661	Nptx2/Crhbp/Lynx1	3
CST<WT	BP	GO:0070371	ERK1 and ERK2 cascade	7/127	281/13966	0.0143015808337159	0.129383131760904	0.110356283759273	Rapgef2/Epha5/Met/Igf1r/Ntrk3/Fgf10/Mapk1	7
CST<WT	BP	GO:0002088	lens development in camera-type eye	3/127	56/13966	0.0143400980407478	0.129383131760904	0.110356283759273	Pds5b/Ntrk3/Sox11	3
CST<WT	BP	GO:0031102	neuron projection regeneration	3/127	56/13966	0.0143400980407478	0.129383131760904	0.110356283759273	Igf1r/Ntrk3/Matn2	3
CST<WT	BP	GO:0086003	cardiac muscle cell contraction	3/127	56/13966	0.0143400980407478	0.129383131760904	0.110356283759273	Cacnb2/Scn3b/Ryr2	3
WT<CST	BP	GO:0002062	chondrocyte differentiation	4/131	100/13966	0.0145100268485358	0.309251253915021	0.290335458867588	Ecm1/Col27a1/Vwa1/Col11a2	4
WT<CST	BP	GO:0061008	hepaticobiliary system development	4/131	100/13966	0.0145100268485358	0.309251253915021	0.290335458867588	Ptn/Ccnd1/Klf1/Plau	4
CST<WT	MF	GO:0042056	chemoattractant activity	2/123	21/13889	0.0146351796171222	0.112945407914747	0.0974562304023469	Fgf10/Vegfd	2
WT<CST	BP	GO:0003418	growth plate cartilage chondrocyte differentiation	2/131	20/13966	0.014854616536498	0.309251253915021	0.290335458867588	Col27a1/Vwa1	2
WT<CST	BP	GO:0072576	liver morphogenesis	2/131	20/13966	0.014854616536498	0.309251253915021	0.290335458867588	Ptn/Plau	2
WT<CST	BP	GO:0045137	development of primary sexual characteristics	5/131	154/13966	0.0149815752789021	0.309251253915021	0.290335458867588	Col9a3/Vgf/Serpine1/Ccnd1/Adcyap1	5
CST<WT	BP	GO:0050878	regulation of body fluid levels	6/127	220/13966	0.0152577557576486	0.13547455452996	0.115551912976549	Fcer1g/Cd34/Met/Chrm3/Lyst/Fgf10	6
CST<WT	BP	GO:0009713	catechol-containing compound biosynthetic process	2/127	21/13966	0.0153887453939069	0.13547455452996	0.115551912976549	Moxd1/Agtr2	2
CST<WT	BP	GO:0042423	catecholamine biosynthetic process	2/127	21/13966	0.0153887453939069	0.13547455452996	0.115551912976549	Moxd1/Agtr2	2
CST<WT	BP	GO:0071880	adenylate cyclase-activating adrenergic receptor signaling pathway	2/127	21/13966	0.0153887453939069	0.13547455452996	0.115551912976549	Atp2b4/Rapgef2	2
CST<WT	BP	GO:0097062	dendritic spine maintenance	2/127	21/13966	0.0153887453939069	0.13547455452996	0.115551912976549	Grin2b/Igf1r	2
CST<WT	BP	GO:0060078	regulation of postsynaptic membrane potential	4/127	105/13966	0.0154020210654268	0.13547455452996	0.115551912976549	Chrna4/Met/Grin2b/Sez6	4
CST<WT	BP	GO:0050679	positive regulation of epithelial cell proliferation	5/127	160/13966	0.0154088949527642	0.13547455452996	0.115551912976549	Foxp2/Sox11/Fgf10/Ar/Vegfd	5
WT<CST	BP	GO:0070997	neuron death	8/131	343/13966	0.0155280511393414	0.314858238211868	0.295599483954243	Bok/Bdnf/Kcnip3/Ache/Gpx1/Serpinf1/Chga/Plau	8
CST<WT	BP	GO:0032103	positive regulation of response to external stimulus	6/127	221/13966	0.0155701375010442	0.136394404509148	0.116336491491056	Fcer1g/Met/Igf1r/Ntrk3/Fgf10/Vegfd	6
WT<CST	BP	GO:0031341	regulation of cell killing	3/131	56/13966	0.0155743238687155	0.314858238211868	0.295599483954243	H60b/H2-D1/H2-T23	3
CST<WT	BP	GO:0045471	response to ethanol	3/127	58/13966	0.0157551265589773	0.137514854639769	0.117292170263629	Grin2b/Igf1r/Glra3	3
CST<WT	BP	GO:0098662	inorganic cation transmembrane transport	10/127	500/13966	0.0158266827421515	0.137640717421816	0.1173995238939	Atp2b4/Cacna1e/Nos1ap/Cacnb2/Grin2b/Scn3b/Ank3/Slc24a4/Ryr2/Fhl1	10
CST<WT	MF	GO:0030165	PDZ domain binding	4/123	109/13889	0.0159717937169572	0.120638016372762	0.104093885142991	Atp2b4/Nos1ap/Rapgef2/Crim1	4
WT<CST	MF	GO:0015175	neutral amino acid transmembrane transporter activity	2/130	21/13889	0.0162522552685969	0.208074820547635	0.18996440779004	Slc7a10/Slc38a3	2
WT<CST	BP	GO:0032673	regulation of interleukin-4 production	2/131	21/13966	0.0163184752989233	0.323237677385744	0.303466382751908	Irf4/H2-T23	2
WT<CST	BP	GO:0060080	inhibitory postsynaptic potential	2/131	21/13966	0.0163184752989233	0.323237677385744	0.303466382751908	Bdnf/Insyn1	2
CST<WT	BP	GO:0050921	positive regulation of chemotaxis	4/127	107/13966	0.0164003039611004	0.142116303029823	0.121216938023733	Met/Ntrk3/Fgf10/Vegfd	4
WT<CST	BP	GO:0031346	positive regulation of cell projection organization	9/131	417/13966	0.0167002410970057	0.325015576610393	0.305135534228819	Syt2/Bdnf/Ache/Ptn/Serpinf1/Sphk1/Kif3c/Alkal2/Adcyap1	9
CST<WT	BP	GO:0060716	labyrinthine layer blood vessel development	2/127	22/13966	0.0168279566347378	0.145071610936629	0.123737643725634	Ncoa6/Mapk1	2
WT<CST	MF	GO:0005539	glycosaminoglycan binding	5/130	159/13889	0.0168345324067666	0.208074820547635	0.18996440779004	Ptn/Anxa4/Adamts8/Colq/Lipg	5
CST<WT	BP	GO:0061564	axon development	9/127	431/13966	0.016861789565071	0.145071610936629	0.123737643725634	Raph1/Epha5/Chl1/Igf1r/Ntrk3/Ank3/Etv1/Dpysl2/Matn2	9
WT<CST	BP	GO:0010951	negative regulation of endopeptidase activity	4/131	105/13966	0.017071190408399	0.325015576610393	0.305135534228819	Serpine1/Gpx1/Serpinf1/Serpina3n	4
WT<CST	BP	GO:0015696	ammonium transport	4/131	105/13966	0.017071190408399	0.325015576610393	0.305135534228819	Syt2/Rhd/Adcyap1/Syt12	4
WT<CST	BP	GO:0060078	regulation of postsynaptic membrane potential	4/131	105/13966	0.017071190408399	0.325015576610393	0.305135534228819	Bdnf/Insyn1/Tmem108/Adcyap1	4
CST<WT	BP	GO:0043410	positive regulation of MAPK cascade	9/127	433/13966	0.0173241048140846	0.148454789728213	0.126623298398319	Rapgef2/Epha5/Ksr2/Met/Igf1r/Ntrk3/Grm5/Fgf10/Ar	9
CST<WT	CC	GO:0044853	plasma membrane raft	4/129	109/14212	0.0173409421775387	0.0854435514565996	0.0673724643452699	Nos1ap/Igf1r/Mapk1/Gnaq	4
CST<WT	BP	GO:0048813	dendrite morphogenesis	5/127	165/13966	0.0173782692832529	0.148454789728213	0.126623298398319	Adgrb3/Rapgef2/Rere/Epha5/Met	5
WT<CST	BP	GO:0050679	positive regulation of epithelial cell proliferation	5/131	160/13966	0.0173987899120131	0.328067567475554	0.308000845709624	Scg2/Ecm1/Ptn/Ccnd1/Apln	5
CST<WT	MF	GO:0017075	syntaxin-1 binding	2/123	23/13889	0.0174303858143091	0.126281366613872	0.108963314113081	Syt1/Syt4	2
CST<WT	MF	GO:0099604	ligand-gated calcium channel activity	2/123	23/13889	0.0174303858143091	0.126281366613872	0.108963314113081	Grin2b/Ryr2	2
CST<WT	BP	GO:0010038	response to metal ion	6/127	227/13966	0.0175381929489733	0.149291543512639	0.127337000693308	Glra3/Ank3/Syt1/Ryr2/Mapk1/Syt4	6
WT<CST	BP	GO:0050433	regulation of catecholamine secretion	3/131	59/13966	0.017899408971124	0.331322227664336	0.311056429955137	Syt2/Chga/Syt12	3
WT<CST	BP	GO:0052547	regulation of peptidase activity	7/131	285/13966	0.0179093096034776	0.331322227664336	0.311056429955137	Bok/Ecm1/Serpine1/Gpx1/Serpinf1/Papln/Serpina3n	7
CST<WT	BP	GO:0030879	mammary gland development	4/127	110/13966	0.0179723981630927	0.151914060262773	0.129573854900672	Igf1r/Fgf10/Mapk1/Ar	4
CST<WT	BP	GO:0071333	cellular response to glucose stimulus	4/127	110/13966	0.0179723981630927	0.151914060262773	0.129573854900672	Cacna1e/Epha5/Igf1r/Gpr68	4
CST<WT	CC	GO:0097470	ribbon synapse	2/129	23/14212	0.0182608939940559	0.0883696834355206	0.0696797270825818	Cacnb2/Pclo	2
CST<WT	BP	GO:0032733	positive regulation of interleukin-10 production	2/127	23/13966	0.0183221856699771	0.152200500961983	0.129818172151707	Fcer1g/Cd34	2
CST<WT	BP	GO:0050849	negative regulation of calcium-mediated signaling	2/127	23/13966	0.0183221856699771	0.152200500961983	0.129818172151707	Atp2b4/Dyrk2	2
CST<WT	BP	GO:0060445	branching involved in salivary gland morphogenesis	2/127	23/13966	0.0183221856699771	0.152200500961983	0.129818172151707	Met/Fgf10	2
CST<WT	BP	GO:0071875	adrenergic receptor signaling pathway	2/127	23/13966	0.0183221856699771	0.152200500961983	0.129818172151707	Atp2b4/Rapgef2	2
CST<WT	BP	GO:1904646	cellular response to amyloid-beta	2/127	23/13966	0.0183221856699771	0.152200500961983	0.129818172151707	Igf1r/Grm5	2
WT<CST	BP	GO:0003018	vascular process in circulatory system	5/131	163/13966	0.0186990522335991	0.337047276497851	0.316431297992293	Ddah1/Gpx1/Chga/Adcyap1/Apln	5
CST<WT	BP	GO:0048678	response to axon injury	3/127	62/13966	0.0188133304049877	0.155743343455723	0.132840010672946	Igf1r/Ntrk3/Matn2	3
CST<WT	BP	GO:0015672	monovalent inorganic cation transport	8/127	367/13966	0.018889925908599	0.155841888745941	0.132924064072045	Atp2b4/Scn3b/Ank3/Slc24a4/Slc38a2/Slc4a8/Gnaq/Fhl1	8
CST<WT	MF	GO:0005520	insulin-like growth factor binding	2/123	24/13889	0.0189061051967052	0.132837657922165	0.114620484671164	Igf1r/Crim1	2
CST<WT	BP	GO:0071331	cellular response to hexose stimulus	4/127	112/13966	0.0190708704324927	0.156797702634385	0.133739317708733	Cacna1e/Epha5/Igf1r/Gpr68	4
CST<WT	MF	GO:0097110	scaffold protein binding	3/123	64/13889	0.0190837198705082	0.132837657922165	0.114620484671164	Atp2b4/Grin2b/Ryr2	3
WT<CST	BP	GO:0008277	regulation of G protein-coupled receptor signaling pathway	4/131	109/13966	0.0193115004534032	0.337047276497851	0.316431297992293	Ramp3/Chga/Adcyap1/Apln	4
WT<CST	BP	GO:0001916	positive regulation of T cell mediated cytotoxicity	2/131	23/13966	0.0194218981357762	0.337047276497851	0.316431297992293	H2-D1/H2-T23	2
WT<CST	BP	GO:0001956	positive regulation of neurotransmitter secretion	2/131	23/13966	0.0194218981357762	0.337047276497851	0.316431297992293	Syt2/Sphk1	2
WT<CST	BP	GO:0042092	type 2 immune response	2/131	23/13966	0.0194218981357762	0.337047276497851	0.316431297992293	Ecm1/Crlf2	2
WT<CST	BP	GO:0045117	azole transport	2/131	23/13966	0.0194218981357762	0.337047276497851	0.316431297992293	Slc38a3/Adcyap1	2
WT<CST	BP	GO:2000352	negative regulation of endothelial cell apoptotic process	2/131	23/13966	0.0194218981357762	0.337047276497851	0.316431297992293	Scg2/Serpine1	2
CST<WT	BP	GO:0007265	Ras protein signal transduction	8/127	369/13966	0.0194462339139272	0.1574592881681	0.13430361167732	Rapgef2/Ksr2/Met/Psd3/Rhou/Arhgap32/Wasf1/Fgf10	8
CST<WT	BP	GO:0009306	protein secretion	9/127	442/13966	0.019520263509184	0.1574592881681	0.13430361167732	Cacna1e/Cd34/Pclo/Epha5/Sel1l/Gpr68/Lyst/Syt4/Agtr2	9
CST<WT	BP	GO:1901655	cellular response to ketone	3/127	63/13966	0.0196256306303895	0.1574592881681	0.13430361167732	Epha5/Agtr2/Ar	3
CST<WT	BP	GO:0071326	cellular response to monosaccharide stimulus	4/127	113/13966	0.0196353813065163	0.1574592881681	0.13430361167732	Cacna1e/Epha5/Igf1r/Gpr68	4
CST<WT	BP	GO:0002029	desensitization of G protein-coupled receptor signaling pathway	2/127	24/13966	0.0198703294325871	0.1574592881681	0.13430361167732	Grm5/Ubqln2	2
CST<WT	BP	GO:0022401	negative adaptation of signaling pathway	2/127	24/13966	0.0198703294325871	0.1574592881681	0.13430361167732	Grm5/Ubqln2	2
CST<WT	BP	GO:0035094	response to nicotine	2/127	24/13966	0.0198703294325871	0.1574592881681	0.13430361167732	Chrna4/Mapk1	2
CST<WT	BP	GO:0071634	regulation of transforming growth factor beta production	2/127	24/13966	0.0198703294325871	0.1574592881681	0.13430361167732	Cd34/Met	2
CST<WT	BP	GO:0098901	regulation of cardiac muscle cell action potential	2/127	24/13966	0.0198703294325871	0.1574592881681	0.13430361167732	Ank3/Ryr2	2
CST<WT	BP	GO:1900273	positive regulation of long-term synaptic potentiation	2/127	24/13966	0.0198703294325871	0.1574592881681	0.13430361167732	Grin2b/Shisa7	2
CST<WT	BP	GO:1903861	positive regulation of dendrite extension	2/127	24/13966	0.0198703294325871	0.1574592881681	0.13430361167732	Syt1/Syt4	2
CST<WT	BP	GO:0070838	divalent metal ion transport	8/127	371/13966	0.0200141910395914	0.157792038350633	0.134587428223301	Atp2b4/Cacna1e/Nos1ap/Cacnb2/Chrna4/Grin2b/Slc24a4/Ryr2	8
CST<WT	BP	GO:0071902	positive regulation of protein serine/threonine kinase activity	6/127	234/13966	0.020043322430591	0.157792038350633	0.134587428223301	Atp2b4/Rapgef2/Met/Ntrk3/Grm5/Fgf10	6
CST<WT	BP	GO:0072511	divalent inorganic cation transport	8/127	372/13966	0.0203025760544161	0.159312396466086	0.135884205239911	Atp2b4/Cacna1e/Nos1ap/Cacnb2/Chrna4/Grin2b/Slc24a4/Ryr2	8
CST<WT	CC	GO:0016529	sarcoplasmic reticulum	3/129	64/14212	0.0203643117871791	0.0968197981460621	0.0763426646869319	Nos1ap/Ank3/Ryr2	3
WT<CST	BP	GO:0050432	catecholamine secretion	3/131	62/13966	0.020407410614908	0.347990714920301	0.326705365359031	Syt2/Chga/Syt12	3
WT<CST	BP	GO:0097755	positive regulation of blood vessel diameter	3/131	62/13966	0.020407410614908	0.347990714920301	0.326705365359031	Gpx1/Adcyap1/Apln	3
CST<WT	BP	GO:0044106	cellular amine metabolic process	3/127	64/13966	0.0204570812581774	0.159485788838023	0.136032098845042	Atp2b4/Moxd1/Htr1a	3
CST<WT	BP	GO:0061178	regulation of insulin secretion involved in cellular response to glucose stimulus	3/127	64/13966	0.0204570812581774	0.159485788838023	0.136032098845042	Cacna1e/Epha5/Gpr68	3
WT<CST	MF	GO:0005520	insulin-like growth factor binding	2/130	24/13889	0.0209744357754624	0.249273102100688	0.227576874000969	Htra4/Kazald1	2
WT<CST	BP	GO:0031935	regulation of chromatin silencing	2/131	24/13966	0.0210590447053942	0.352963988609214	0.331374441653032	Hist1h1e/Hist1h1c	2
WT<CST	BP	GO:0032967	positive regulation of collagen biosynthetic process	2/131	24/13966	0.0210590447053942	0.352963988609214	0.331374441653032	Creb3l1/Serpine1	2
CST<WT	BP	GO:0061180	mammary gland epithelium development	3/127	65/13966	0.0213076974516913	0.162655226153529	0.138735444474313	Fgf10/Mapk1/Ar	3
CST<WT	BP	GO:0051668	localization within membrane	5/127	174/13966	0.0213304986920572	0.162655226153529	0.138735444474313	Grin2b/Shisa7/Gsg1l/Glra3/Htr1a	5
CST<WT	CC	GO:0097386	glial cell projection	2/129	25/14212	0.0213998740593794	0.0999890667257208	0.0788416412713976	Grm5/Syt4	2
CST<WT	BP	GO:0010460	positive regulation of heart rate	2/127	25/13966	0.0214713000900051	0.162655226153529	0.138735444474313	Scn3b/Ryr2	2
CST<WT	BP	GO:0023058	adaptation of signaling pathway	2/127	25/13966	0.0214713000900051	0.162655226153529	0.138735444474313	Grm5/Ubqln2	2
CST<WT	BP	GO:0031128	developmental induction	2/127	25/13966	0.0214713000900051	0.162655226153529	0.138735444474313	Fgf10/Ar	2
CST<WT	BP	GO:0045956	positive regulation of calcium ion-dependent exocytosis	2/127	25/13966	0.0214713000900051	0.162655226153529	0.138735444474313	Syt1/Syt4	2
CST<WT	BP	GO:0051125	regulation of actin nucleation	2/127	25/13966	0.0214713000900051	0.162655226153529	0.138735444474313	Wasf1/Wipf2	2
CST<WT	BP	GO:0086005	ventricular cardiac muscle cell action potential	2/127	25/13966	0.0214713000900051	0.162655226153529	0.138735444474313	Scn3b/Ryr2	2
CST<WT	BP	GO:1904645	response to amyloid-beta	2/127	25/13966	0.0214713000900051	0.162655226153529	0.138735444474313	Igf1r/Grm5	2
WT<CST	BP	GO:0090276	regulation of peptide hormone secretion	5/131	169/13966	0.0214884557280213	0.357108997310592	0.335265914971537	Pde4c/Chga/Crhbp/Adcyap1/Apln	5
WT<CST	BP	GO:0001936	regulation of endothelial cell proliferation	4/131	113/13966	0.0217258261351247	0.358019706310752	0.336120919153764	Scg2/Ecm1/Apln/Tnmd	4
CST<WT	BP	GO:0010035	response to inorganic substance	8/127	377/13966	0.0217891668464758	0.164545777219938	0.140347974539914	Atp2b4/Met/Glra3/Ank3/Syt1/Ryr2/Mapk1/Syt4	8
CST<WT	BP	GO:0022612	gland morphogenesis	4/127	117/13966	0.0219963410047035	0.165075344175485	0.14079966434229	Met/Igf1r/Fgf10/Ar	4
CST<WT	BP	GO:0042133	neurotransmitter metabolic process	4/127	117/13966	0.0219963410047035	0.165075344175485	0.14079966434229	Atp2b4/Cd34/Moxd1/Htr1a	4
CST<WT	MF	GO:0017080	sodium channel regulator activity	2/123	26/13889	0.0220087147073635	0.147416862662529	0.127200317375229	Atp2b4/Scn3b	2
CST<WT	MF	GO:0099528	G protein-coupled neurotransmitter receptor activity	2/123	26/13889	0.0220087147073635	0.147416862662529	0.127200317375229	Chrm3/Htr1a	2
CST<WT	BP	GO:0002444	myeloid leukocyte mediated immunity	3/127	66/13966	0.0221774887700875	0.165917920643294	0.141518333047436	Fcer1g/Pla2g3/Lyst	3
WT<CST	BP	GO:0015672	monovalent inorganic cation transport	8/131	367/13966	0.0223030823531735	0.359804992678892	0.337797005928974	Kcnip3/Ank1/Slc5a5/Slc12a4/Kcng4/Slc38a3/Atp6v0c/Adcyap1	8
CST<WT	BP	GO:0006865	amino acid transport	4/127	118/13966	0.0226125258639372	0.167788481603201	0.143113812715234	Grin2b/Dpysl2/Slc38a2/Syt4	4
CST<WT	BP	GO:0097305	response to alcohol	4/127	118/13966	0.0226125258639372	0.167788481603201	0.143113812715234	Epha5/Grin2b/Igf1r/Glra3	4
WT<CST	BP	GO:0003413	chondrocyte differentiation involved in endochondral bone morphogenesis	2/131	25/13966	0.022751565064856	0.359804992678892	0.337797005928974	Col27a1/Vwa1	2
WT<CST	BP	GO:0032633	interleukin-4 production	2/131	25/13966	0.022751565064856	0.359804992678892	0.337797005928974	Irf4/H2-T23	2
WT<CST	BP	GO:0045815	positive regulation of gene expression, epigenetic	2/131	25/13966	0.022751565064856	0.359804992678892	0.337797005928974	Hist1h1e/Hist1h1c	2
WT<CST	BP	GO:1902042	negative regulation of extrinsic apoptotic signaling pathway via death domain receptors	2/131	25/13966	0.022751565064856	0.359804992678892	0.337797005928974	Serpine1/Gpx1	2
CST<WT	CC	GO:0097440	apical dendrite	2/129	26/14212	0.0230473160435909	0.104395460236806	0.0823160941078717	Grin2b/Sez6	2
CST<WT	BP	GO:0006835	dicarboxylic acid transport	3/127	67/13966	0.023066459299929	0.167788481603201	0.143113812715234	Grin2b/Dpysl2/Syt4	3
CST<WT	BP	GO:0051966	regulation of synaptic transmission, glutamatergic	3/127	67/13966	0.023066459299929	0.167788481603201	0.143113812715234	Grik3/Grm5/Syt1	3
CST<WT	CC	GO:0016323	basolateral plasma membrane	5/129	178/14212	0.0231133860302891	0.104395460236806	0.0823160941078717	Atp2b4/Cd34/Met/Pianp/Ank3	5
CST<WT	BP	GO:0007271	synaptic transmission, cholinergic	2/127	26/13966	0.0231240248618774	0.167788481603201	0.143113812715234	Chrna4/Chrm3	2
CST<WT	BP	GO:0045745	positive regulation of G protein-coupled receptor signaling pathway	2/127	26/13966	0.0231240248618774	0.167788481603201	0.143113812715234	Grp/Ubqln2	2
CST<WT	BP	GO:0048566	embryonic digestive tract development	2/127	26/13966	0.0231240248618774	0.167788481603201	0.143113812715234	Sox11/Fgf10	2
CST<WT	BP	GO:0060571	morphogenesis of an epithelial fold	2/127	26/13966	0.0231240248618774	0.167788481603201	0.143113812715234	Fgf10/Ar	2
CST<WT	BP	GO:0071604	transforming growth factor beta production	2/127	26/13966	0.0231240248618774	0.167788481603201	0.143113812715234	Cd34/Met	2
CST<WT	BP	GO:2000311	regulation of AMPA receptor activity	2/127	26/13966	0.0231240248618774	0.167788481603201	0.143113812715234	Shisa7/Gsg1l	2
WT<CST	BP	GO:0008015	blood circulation	8/131	371/13966	0.0236082410823854	0.36121167615479	0.339117647599092	Ddah1/Npy/Gpx1/Myl4/Chga/Adcyap1/Apln/Nox1	8
WT<CST	BP	GO:0050680	negative regulation of epithelial cell proliferation	4/131	116/13966	0.0236526446794891	0.36121167615479	0.339117647599092	Rap1gap/Ptn/Serpinf1/Tnmd	4
WT<CST	BP	GO:0045861	negative regulation of proteolysis	6/131	236/13966	0.0238072517657226	0.36121167615479	0.339117647599092	Ecm1/Serpine1/Gpx1/Serpinf1/Papln/Serpina3n	6
CST<WT	BP	GO:0071322	cellular response to carbohydrate stimulus	4/127	120/13966	0.0238763087120385	0.172726809871774	0.147325919411725	Cacna1e/Epha5/Igf1r/Gpr68	4
CST<WT	BP	GO:0009308	amine metabolic process	3/127	68/13966	0.0239746077846057	0.17291865315304	0.147489550569021	Atp2b4/Moxd1/Htr1a	3
WT<CST	BP	GO:0061515	myeloid cell development	3/131	66/13966	0.0240369786135134	0.36121167615479	0.339117647599092	Rhd/Ank1/Klf1	3
WT<CST	BP	GO:0002792	negative regulation of peptide secretion	4/131	117/13966	0.0243172569989122	0.36121167615479	0.339117647599092	Anxa4/Pde4c/Chga/Crhbp	4
WT<CST	BP	GO:0001914	regulation of T cell mediated cytotoxicity	2/131	26/13966	0.0244982931813295	0.36121167615479	0.339117647599092	H2-D1/H2-T23	2
WT<CST	BP	GO:0033598	mammary gland epithelial cell proliferation	2/131	26/13966	0.0244982931813295	0.36121167615479	0.339117647599092	Ccnd1/Gpx1	2
WT<CST	BP	GO:1902235	regulation of endoplasmic reticulum stress-induced intrinsic apoptotic signaling pathway	2/131	26/13966	0.0244982931813295	0.36121167615479	0.339117647599092	Bok/Creb3l1	2
WT<CST	BP	GO:2000272	negative regulation of signaling receptor activity	2/131	26/13966	0.0244982931813295	0.36121167615479	0.339117647599092	Ramp3/Crhbp	2
CST<WT	BP	GO:0003156	regulation of animal organ formation	2/127	27/13966	0.0248274458398082	0.175393891578	0.149600784933803	Fgf10/Ar	2
CST<WT	BP	GO:0006376	mRNA splice site selection	2/127	27/13966	0.0248274458398082	0.175393891578	0.149600784933803	Celf2/Celf1	2
CST<WT	BP	GO:0010800	positive regulation of peptidyl-threonine phosphorylation	2/127	27/13966	0.0248274458398082	0.175393891578	0.149600784933803	Met/Mapk1	2
CST<WT	BP	GO:0048009	insulin-like growth factor receptor signaling pathway	2/127	27/13966	0.0248274458398082	0.175393891578	0.149600784933803	Igf1r/Ar	2
CST<WT	BP	GO:0050999	regulation of nitric-oxide synthase activity	2/127	27/13966	0.0248274458398082	0.175393891578	0.149600784933803	Atp2b4/Agtr2	2
CST<WT	BP	GO:0070528	protein kinase C signaling	2/127	27/13966	0.0248274458398082	0.175393891578	0.149600784933803	Sez6l/Sez6	2
CST<WT	BP	GO:1903859	regulation of dendrite extension	2/127	27/13966	0.0248274458398082	0.175393891578	0.149600784933803	Syt1/Syt4	2
CST<WT	BP	GO:0019226	transmission of nerve impulse	3/127	69/13966	0.0249019277516162	0.175405684074981	0.14961084324763	Cacna1e/Ntrk3/Ank3	3
WT<CST	BP	GO:0006865	amino acid transport	4/131	118/13966	0.0249931040097887	0.365757290770116	0.343385223198118	Bdnf/Slc7a10/Slc38a3/Nfkbie	4
CST<WT	MF	GO:0005509	calcium ion binding	9/123	475/13889	0.0252382785968916	0.162610691072565	0.14031048510635	Myl1/Cacna1e/Pclo/Caln1/Syt1/Ryr2/Matn2/Syt4/Pcdh19	9
CST<WT	MF	GO:0001965	G-protein alpha-subunit binding	2/123	28/13889	0.0253062942409965	0.162610691072565	0.14031048510635	Igf1r/Htr1a	2
CST<WT	MF	GO:0044325	ion channel binding	4/123	126/13889	0.0256512639438413	0.162610691072565	0.14031048510635	Cntnap2/Scn3b/Ank3/Fhl1	4
CST<WT	CC	GO:0099061	integral component of postsynaptic density membrane	3/129	70/14212	0.0257326769262419	0.11432058109855	0.0901420779297172	Grin2b/Gsg1l/Chrm3	3
CST<WT	BP	GO:0001678	cellular glucose homeostasis	4/127	123/13966	0.0258510528382988	0.181560309875982	0.154860380973943	Cacna1e/Epha5/Igf1r/Gpr68	4
WT<CST	BP	GO:0071277	cellular response to calcium ion	3/131	68/13966	0.0259742028919852	0.371011038501941	0.348317617939233	Syt2/Crhbp/Syt12	3
WT<CST	BP	GO:0002791	regulation of peptide secretion	8/131	378/13966	0.0260204956533126	0.371011038501941	0.348317617939233	Crlf2/Anxa4/Pde4c/Chga/Crhbp/H2-T23/Adcyap1/Apln	8
CST<WT	BP	GO:0072659	protein localization to plasma membrane	6/127	249/13966	0.0262095966780244	0.183543367434188	0.156551813694931	Fcer1g/Cacnb2/Rapgef2/Scn3b/Ank3/Ar	6
WT<CST	BP	GO:0009268	response to pH	2/131	27/13966	0.0262980797306322	0.371011038501941	0.348317617939233	Slc38a3/Nox1	2
WT<CST	BP	GO:0010714	positive regulation of collagen metabolic process	2/131	27/13966	0.0262980797306322	0.371011038501941	0.348317617939233	Creb3l1/Serpine1	2
WT<CST	BP	GO:1902175	regulation of oxidative stress-induced intrinsic apoptotic signaling pathway	2/131	27/13966	0.0262980797306322	0.371011038501941	0.348317617939233	Gpx1/Nox1	2
CST<WT	CC	GO:0032588	trans-Golgi network membrane	2/129	28/14212	0.0264928386812282	0.115799343267949	0.0913080857774078	Caln1/Nsg2	2
CST<WT	BP	GO:0002026	regulation of the force of heart contraction	2/127	28/13966	0.0265805198090991	0.184531620230893	0.15739473583304	Atp2b4/Ryr2	2
CST<WT	BP	GO:0009593	detection of chemical stimulus	2/127	28/13966	0.0265805198090991	0.184531620230893	0.15739473583304	Syt1/Ryr2	2
CST<WT	BP	GO:0043243	positive regulation of protein complex disassembly	2/127	28/13966	0.0265805198090991	0.184531620230893	0.15739473583304	Igf1r/Htr1a	2
CST<WT	BP	GO:1901019	regulation of calcium ion transmembrane transporter activity	3/127	71/13966	0.0268140309121232	0.185617817434784	0.15832119885198	Nos1ap/Cacnb2/Ryr2	3
WT<CST	BP	GO:0034620	cellular response to unfolded protein	3/131	69/13966	0.0269733838307291	0.375140465901133	0.352194463008176	Bok/Creb3l1/Ccnd1	3
WT<CST	BP	GO:0050886	endocrine process	3/131	69/13966	0.0269733838307291	0.375140465901133	0.352194463008176	Crhbp/Apln/Nox1	3
CST<WT	MF	GO:0005272	sodium channel activity	2/123	29/13889	0.0270257760331942	0.16831842968042	0.145235472311348	Grik3/Scn3b	2
CST<WT	BP	GO:0006820	anion transport	8/127	394/13966	0.027421239603819	0.189277267064757	0.161442496476111	Grin2b/Grm5/Glra3/Dpysl2/Slc38a2/Slc4a8/Syt4/Agtr2	8
CST<WT	BP	GO:0035773	insulin secretion involved in cellular response to glucose stimulus	3/127	72/13966	0.0277987761973316	0.190789891337242	0.162732676974633	Cacna1e/Epha5/Gpr68	3
CST<WT	BP	GO:1903524	positive regulation of blood circulation	3/127	72/13966	0.0277987761973316	0.190789891337242	0.162732676974633	Npy1r/Scn3b/Ryr2	3
WT<CST	BP	GO:0048265	response to pain	2/131	28/13966	0.0281497918903129	0.385180301032198	0.361620197270627	Kcnip3/Vwa1	2
WT<CST	MF	GO:0061134	peptidase regulator activity	4/130	123/13889	0.0283453517144867	0.31705861786452	0.289462475175239	Serpine1/Serpinf1/Papln/Serpina3n	4
CST<WT	BP	GO:0006270	DNA replication initiation	2/127	29/13966	0.0283822180724635	0.192599333342436	0.164276025730019	Rny3/Rny1	2
CST<WT	BP	GO:0030947	regulation of vascular endothelial growth factor receptor signaling pathway	2/127	29/13966	0.0283822180724635	0.192599333342436	0.164276025730019	Fgf10/Vegfd	2
CST<WT	BP	GO:0033260	nuclear DNA replication	2/127	29/13966	0.0283822180724635	0.192599333342436	0.164276025730019	Rny3/Rny1	2
CST<WT	BP	GO:1905332	positive regulation of morphogenesis of an epithelium	2/127	29/13966	0.0283822180724635	0.192599333342436	0.164276025730019	Agtr2/Ar	2
CST<WT	BP	GO:0071417	cellular response to organonitrogen compound	8/127	397/13966	0.028511299641713	0.192931800103614	0.164559600534074	Atp2b4/Rapgef2/Cpeb2/Igf1r/Grm5/Glra3/Ryr2/Mapk1	8
CST<WT	BP	GO:0002790	peptide secretion	9/127	473/13966	0.0286392547074615	0.193254802773879	0.16483510301921	Cacna1e/Cd34/Pclo/Epha5/Sel1l/Gpr68/Lyst/Syt4/Agtr2	9
CST<WT	CC	GO:0016528	sarcoplasm	3/129	73/14212	0.0286744870804969	0.123345809504994	0.0972584941911589	Nos1ap/Ank3/Ryr2	3
CST<WT	MF	GO:0008227	G protein-coupled amine receptor activity	2/123	30/13889	0.0287911204208131	0.176221512920494	0.152054737612642	Chrm3/Htr1a	2
WT<CST	MF	GO:0004252	serine-type endopeptidase activity	3/130	71/13889	0.0288726365148511	0.31705861786452	0.289462475175239	Pamr1/Htra4/Plau	3
WT<CST	BP	GO:0001909	leukocyte mediated cytotoxicity	3/131	71/13966	0.0290327614842042	0.385180301032198	0.361620197270627	H60b/H2-D1/H2-T23	3
WT<CST	BP	GO:1904035	regulation of epithelial cell apoptotic process	3/131	71/13966	0.0290327614842042	0.385180301032198	0.361620197270627	Scg2/Bok/Serpine1	3
CST<WT	BP	GO:1903034	regulation of response to wounding	4/127	128/13966	0.0293552365844938	0.197532862938675	0.1684840394382	Fcer1g/Cd34/Igf1r/Ntrk3	4
WT<CST	BP	GO:0003015	heart process	5/131	184/13966	0.0296092371640114	0.385180301032198	0.361620197270627	Gpx1/Ramp3/Myl4/Chga/Apln	5
WT<CST	BP	GO:0001919	regulation of receptor recycling	2/131	29/13966	0.0300523131350976	0.385180301032198	0.361620197270627	Ache/Ramp3	2
WT<CST	BP	GO:0002715	regulation of natural killer cell mediated immunity	2/131	29/13966	0.0300523131350976	0.385180301032198	0.361620197270627	H60b/H2-T23	2
WT<CST	BP	GO:0030195	negative regulation of blood coagulation	2/131	29/13966	0.0300523131350976	0.385180301032198	0.361620197270627	Serpine1/Plau	2
WT<CST	BP	GO:0040036	regulation of fibroblast growth factor receptor signaling pathway	2/131	29/13966	0.0300523131350976	0.385180301032198	0.361620197270627	Creb3l1/Apln	2
WT<CST	BP	GO:0042269	regulation of natural killer cell mediated cytotoxicity	2/131	29/13966	0.0300523131350976	0.385180301032198	0.361620197270627	H60b/H2-T23	2
WT<CST	BP	GO:0043950	positive regulation of cAMP-mediated signaling	2/131	29/13966	0.0300523131350976	0.385180301032198	0.361620197270627	Chga/Adcyap1	2
WT<CST	BP	GO:0060969	negative regulation of gene silencing	2/131	29/13966	0.0300523131350976	0.385180301032198	0.361620197270627	Hist1h1e/Hist1h1c	2
WT<CST	BP	GO:1900047	negative regulation of hemostasis	2/131	29/13966	0.0300523131350976	0.385180301032198	0.361620197270627	Serpine1/Plau	2
CST<WT	CC	GO:0032839	dendrite cytoplasm	2/129	30/14212	0.0301323621193161	0.127591720848979	0.100606406418111	Grik3/Mapk1	2
CST<WT	BP	GO:0031338	regulation of vesicle fusion	2/127	30/13966	0.0302315262756895	0.198982914749005	0.169720849267029	Syt1/Syt4	2
CST<WT	BP	GO:0033238	regulation of cellular amine metabolic process	2/127	30/13966	0.0302315262756895	0.198982914749005	0.169720849267029	Atp2b4/Htr1a	2
CST<WT	BP	GO:0048011	neurotrophin TRK receptor signaling pathway	2/127	30/13966	0.0302315262756895	0.198982914749005	0.169720849267029	Wasf1/Agtr2	2
CST<WT	BP	GO:0048679	regulation of axon regeneration	2/127	30/13966	0.0302315262756895	0.198982914749005	0.169720849267029	Igf1r/Ntrk3	2
CST<WT	BP	GO:0051953	negative regulation of amine transport	2/127	30/13966	0.0302315262756895	0.198982914749005	0.169720849267029	Syt4/Agtr2	2
CST<WT	BP	GO:0060074	synapse maturation	2/127	30/13966	0.0302315262756895	0.198982914749005	0.169720849267029	Sez6l/Sez6	2
CST<WT	BP	GO:0086091	regulation of heart rate by cardiac conduction	2/127	30/13966	0.0302315262756895	0.198982914749005	0.169720849267029	Cacnb2/Scn3b	2
CST<WT	BP	GO:1903427	negative regulation of reactive oxygen species biosynthetic process	2/127	30/13966	0.0302315262756895	0.198982914749005	0.169720849267029	Atp2b4/Cd34	2
CST<WT	BP	GO:0035296	regulation of tube diameter	4/127	130/13966	0.030832060227626	0.20183269860965	0.172151549097042	Npy1r/Chrm3/Htr1a/Agtr2	4
CST<WT	BP	GO:0097746	regulation of blood vessel diameter	4/127	130/13966	0.030832060227626	0.20183269860965	0.172151549097042	Npy1r/Chrm3/Htr1a/Agtr2	4
WT<CST	BP	GO:0051937	catecholamine transport	3/131	73/13966	0.0311732694681487	0.396953126149607	0.372672920709447	Syt2/Chga/Syt12	3
CST<WT	BP	GO:0007613	memory	4/127	131/13966	0.0315866645794723	0.206212127295254	0.175886946966567	Pak7/Grin2b/Shisa7/Syt4	4
WT<CST	BP	GO:0001935	endothelial cell proliferation	4/131	127/13966	0.0315866645794723	0.399622253163517	0.3751787867538	Scg2/Ecm1/Apln/Tnmd	4
CST<WT	CC	GO:0099146	intrinsic component of postsynaptic density membrane	3/129	76/14212	0.0317872672312239	0.132528452610179	0.104499032355278	Grin2b/Gsg1l/Chrm3	3
WT<CST	MF	GO:0042887	amide transmembrane transporter activity	2/130	30/13889	0.0318785164043676	0.31705861786452	0.289462475175239	Slc38a3/Slc14a1	2
CST<WT	BP	GO:0030004	cellular monovalent inorganic cation homeostasis	3/127	76/13966	0.0319283868765076	0.206938537868132	0.176506532921978	Slc4a8/Mapk1/Agtr2	3
CST<WT	BP	GO:0070252	actin-mediated cell contraction	3/127	76/13966	0.0319283868765076	0.206938537868132	0.176506532921978	Cacnb2/Scn3b/Ryr2	3
WT<CST	MF	GO:0004222	metalloendopeptidase activity	3/130	74/13889	0.0320972693524664	0.31705861786452	0.289462475175239	Ecel1/Pappa/Adamts8	3
CST<WT	BP	GO:0031112	positive regulation of microtubule polymerization or depolymerization	2/127	31/13966	0.0321274442352351	0.206938537868132	0.176506532921978	Met/Htr1a	2
CST<WT	BP	GO:0032768	regulation of monooxygenase activity	2/127	31/13966	0.0321274442352351	0.206938537868132	0.176506532921978	Atp2b4/Agtr2	2
CST<WT	BP	GO:0060674	placenta blood vessel development	2/127	31/13966	0.0321274442352351	0.206938537868132	0.176506532921978	Ncoa6/Mapk1	2
WT<CST	BP	GO:0002460	adaptive immune response based on somatic recombination of immune receptors built from immunoglobulin superfamily domains	5/131	189/13966	0.0326937750107387	0.40918613211138	0.384157677373415	Crlf2/H60b/Irf4/H2-D1/H2-T23	5
WT<CST	CC	GO:0043195	terminal bouton	3/134	74/14212	0.0327078223722026	0.37777534839894	0.359786046094229	Bdnf/Npy/Adcyap1	3
CST<WT	BP	GO:0001763	morphogenesis of a branching structure	5/127	195/13966	0.0327118702376431	0.209582168623623	0.178761396147478	Rere/Met/Fgf10/Agtr2/Ar	5
CST<WT	BP	GO:0051495	positive regulation of cytoskeleton organization	5/127	195/13966	0.0327118702376431	0.209582168623623	0.178761396147478	Met/Ntrk3/Wasf1/Wipf2/Htr1a	5
CST<WT	BP	GO:0010256	endomembrane system organization	7/127	335/13966	0.033328659954757	0.212427948725516	0.18118868100422	Dync2h1/Ank3/Pla2g3/Lyst/Mapk1/Syt4/Ar	7
CST<WT	BP	GO:0097191	extrinsic apoptotic signaling pathway	5/127	196/13966	0.0333324054040038	0.212427948725516	0.18118868100422	Pak7/Fgf10/Faim2/Agtr2/Ar	5
WT<CST	BP	GO:0046888	negative regulation of hormone secretion	3/131	75/13966	0.0333945684001811	0.40918613211138	0.384157677373415	Pde4c/Chga/Crhbp	3
WT<CST	MF	GO:0003823	antigen binding	2/130	31/13889	0.0338719417136354	0.31705861786452	0.289462475175239	H2-D1/H2-T23	2
WT<CST	MF	GO:0008200	ion channel inhibitor activity	2/130	31/13889	0.0338719417136354	0.31705861786452	0.289462475175239	Pacsin3/Lynx1	2
CST<WT	BP	GO:0035107	appendage morphogenesis	4/127	134/13966	0.0339154633230902	0.212622245374276	0.18135440474125	Dync2h1/Sox11/Fgf10/Gnaq	4
CST<WT	BP	GO:0035108	limb morphogenesis	4/127	134/13966	0.0339154633230902	0.212622245374276	0.18135440474125	Dync2h1/Sox11/Fgf10/Gnaq	4
CST<WT	BP	GO:1901215	negative regulation of neuron death	5/127	197/13966	0.0339602560055139	0.212622245374276	0.18135440474125	Nos1ap/Cd34/Chl1/Prkcg/Faim2	5
WT<CST	BP	GO:0007548	sex differentiation	5/131	191/13966	0.0339817800380419	0.40918613211138	0.384157677373415	Col9a3/Vgf/Serpine1/Ccnd1/Adcyap1	5
WT<CST	BP	GO:0035296	regulation of tube diameter	4/131	130/13966	0.0339909445054775	0.40918613211138	0.384157677373415	Gpx1/Chga/Adcyap1/Apln	4
WT<CST	BP	GO:0097746	regulation of blood vessel diameter	4/131	130/13966	0.0339909445054775	0.40918613211138	0.384157677373415	Gpx1/Chga/Adcyap1/Apln	4
WT<CST	BP	GO:0043403	skeletal muscle tissue regeneration	2/131	31/13966	0.0340053970537974	0.40918613211138	0.384157677373415	Gpx1/Plau	2
WT<CST	BP	GO:0050819	negative regulation of coagulation	2/131	31/13966	0.0340053970537974	0.40918613211138	0.384157677373415	Serpine1/Plau	2
WT<CST	BP	GO:0002790	peptide secretion	9/131	473/13966	0.0340119018532152	0.40918613211138	0.384157677373415	Crlf2/Vgf/Anxa4/Pde4c/Chga/Crhbp/H2-T23/Adcyap1/Apln	9
CST<WT	BP	GO:0007435	salivary gland morphogenesis	2/127	32/13966	0.0340689857677337	0.212622245374276	0.18135440474125	Met/Fgf10	2
CST<WT	BP	GO:0048483	autonomic nervous system development	2/127	32/13966	0.0340689857677337	0.212622245374276	0.18135440474125	Pds5b/Sox11	2
CST<WT	BP	GO:0070884	regulation of calcineurin-NFAT signaling cascade	2/127	32/13966	0.0340689857677337	0.212622245374276	0.18135440474125	Atp2b4/Dyrk2	2
CST<WT	BP	GO:0106056	regulation of calcineurin-mediated signaling	2/127	32/13966	0.0340689857677337	0.212622245374276	0.18135440474125	Atp2b4/Dyrk2	2
CST<WT	BP	GO:1901385	regulation of voltage-gated calcium channel activity	2/127	32/13966	0.0340689857677337	0.212622245374276	0.18135440474125	Nos1ap/Cacnb2	2
CST<WT	BP	GO:0048638	regulation of developmental growth	7/127	337/13966	0.0342548663794432	0.213229904672038	0.181872702768049	Celf1/Ntrk3/Npy1r/Syt1/Dpysl2/Syt4/Ar	7
WT<CST	BP	GO:0010817	regulation of hormone levels	8/131	399/13966	0.0342825732949737	0.409927598972216	0.384853791353716	Vgf/Ache/Pde4c/Slc5a5/Chga/Crhbp/Adcyap1/Apln	8
WT<CST	MF	GO:0005509	calcium ion binding	9/130	475/13889	0.0343796829996785	0.31705861786452	0.289462475175239	Syt2/Pamr1/Kcnip3/Cdh22/Efhd2/Anxa4/Myl4/Hist1h1e/Syt12	9
CST<WT	BP	GO:0070372	regulation of ERK1 and ERK2 cascade	6/127	266/13966	0.0345943674793383	0.214788224891046	0.183201859250321	Rapgef2/Epha5/Met/Igf1r/Ntrk3/Fgf10	6
CST<WT	BP	GO:0042136	neurotransmitter biosynthetic process	3/127	79/13966	0.0352246500833074	0.218139285477346	0.186060118962566	Atp2b4/Cd34/Moxd1	3
WT<CST	MF	GO:0008081	phosphoric diester hydrolase activity	3/130	77/13889	0.0355025135671922	0.31705861786452	0.289462475175239	Plcxd1/Gdpd5/Pde4c	3
CST<WT	BP	GO:0050673	epithelial cell proliferation	7/127	340/13966	0.0356761788665244	0.219890949513996	0.18755418647236	Cd34/Foxp2/Sox11/Fgf10/Mapk1/Ar/Vegfd	7
WT<CST	MF	GO:0016248	channel inhibitor activity	2/130	32/13889	0.0359127884312563	0.31705861786452	0.289462475175239	Pacsin3/Lynx1	2
CST<WT	BP	GO:0071363	cellular response to growth factor stimulus	9/127	493/13966	0.0359161705366663	0.219890949513996	0.18755418647236	Rapgef2/Igf1r/Ntrk3/Wasf1/Sox11/Ryr2/Fgf10/Agtr2/Vegfd	9
CST<WT	CC	GO:0098688	parallel fiber to Purkinje cell synapse	2/129	33/14212	0.0359379120843098	0.147563245073454	0.116354005631816	Pclo/Grin2b	2
WT<CST	BP	GO:0006898	receptor-mediated endocytosis	5/131	194/13966	0.0359723772961212	0.420842346794641	0.395100923021996	Serpine1/Ache/Tmem108/Ramp3/Apln	5
WT<CST	BP	GO:0003417	growth plate cartilage development	2/131	32/13966	0.0360538063546658	0.420842346794641	0.395100923021996	Col27a1/Vwa1	2
WT<CST	BP	GO:1990089	response to nerve growth factor	2/131	32/13966	0.0360538063546658	0.420842346794641	0.395100923021996	Bdnf/Tmem108	2
WT<CST	BP	GO:1990090	cellular response to nerve growth factor stimulus	2/131	32/13966	0.0360538063546658	0.420842346794641	0.395100923021996	Bdnf/Tmem108	2
CST<WT	BP	GO:0007212	dopamine receptor signaling pathway	2/127	33/13966	0.0360551785213899	0.219890949513996	0.18755418647236	Nsg2/Gnaq	2
CST<WT	BP	GO:0021884	forebrain neuron development	2/127	33/13966	0.0360551785213899	0.219890949513996	0.18755418647236	Rapgef2/Gnaq	2
CST<WT	BP	GO:0038083	peptidyl-tyrosine autophosphorylation	2/127	33/13966	0.0360551785213899	0.219890949513996	0.18755418647236	Igf1r/Sla	2
CST<WT	BP	GO:1901021	positive regulation of calcium ion transmembrane transporter activity	2/127	33/13966	0.0360551785213899	0.219890949513996	0.18755418647236	Cacnb2/Ryr2	2
CST<WT	MF	GO:0008013	beta-catenin binding	3/123	82/13889	0.0362024308442277	0.21782818558815	0.187955528557899	Met/Grin2b/Ar	3
CST<WT	BP	GO:0033138	positive regulation of peptidyl-serine phosphorylation	3/127	80/13966	0.0363610586446886	0.220639270214244	0.188192460491667	Atp2b4/Met/Ntrk3	3
CST<WT	BP	GO:0045921	positive regulation of exocytosis	3/127	80/13966	0.0363610586446886	0.220639270214244	0.188192460491667	Fcer1g/Syt1/Syt4	3
WT<CST	CC	GO:0031672	A band	2/134	32/14212	0.0363990191595842	0.400389210755426	0.381323057862311	Ank1/Myl4	2
CST<WT	BP	GO:0031346	positive regulation of cell projection organization	8/127	417/13966	0.0365550988793322	0.22125937990028	0.188721377975288	Cbfa2t2/Rapgef2/Met/Igf1r/Ntrk3/Syt1/Sez6/Syt4	8
WT<CST	BP	GO:0002708	positive regulation of lymphocyte mediated immunity	3/131	78/13966	0.0368770692714531	0.427904928055145	0.401731511403124	H60b/H2-D1/H2-T23	3
CST<WT	CC	GO:0034705	potassium channel complex	3/129	81/14212	0.0373521710113588	0.1510811693146	0.119127898119495	Nos1ap/Grik3/Cntnap2	3
CST<WT	BP	GO:0032147	activation of protein kinase activity	5/127	203/13966	0.0378819823924986	0.227659847931691	0.194180604820808	Pak7/Met/Ntrk3/Grm5/Fgf10	5
WT<CST	BP	GO:0001938	positive regulation of endothelial cell proliferation	3/131	79/13966	0.0380778013072593	0.429940432279929	0.403642511102067	Scg2/Ecm1/Apln	3
WT<CST	BP	GO:0042136	neurotransmitter biosynthetic process	3/131	79/13966	0.0380778013072593	0.429940432279929	0.403642511102067	Gad1/Ddah1/Gla	3
CST<WT	BP	GO:0031076	embryonic camera-type eye development	2/127	34/13966	0.0380850638092451	0.227659847931691	0.194180604820808	Sox11/Fgf10	2
CST<WT	BP	GO:0043267	negative regulation of potassium ion transport	2/127	34/13966	0.0380850638092451	0.227659847931691	0.194180604820808	Ank3/Gnaq	2
CST<WT	BP	GO:0070570	regulation of neuron projection regeneration	2/127	34/13966	0.0380850638092451	0.227659847931691	0.194180604820808	Igf1r/Ntrk3	2
CST<WT	BP	GO:2000171	negative regulation of dendrite development	2/127	34/13966	0.0380850638092451	0.227659847931691	0.194180604820808	Rapgef2/Sez6	2
WT<CST	BP	GO:0030261	chromosome condensation	2/131	33/13966	0.0381487176015847	0.429940432279929	0.403642511102067	Hist1h1e/Hist1h1c	2
WT<CST	BP	GO:0060251	regulation of glial cell proliferation	2/131	33/13966	0.0381487176015847	0.429940432279929	0.403642511102067	Ptn/Adcyap1	2
WT<CST	BP	GO:1900087	positive regulation of G1/S transition of mitotic cell cycle	2/131	33/13966	0.0381487176015847	0.429940432279929	0.403642511102067	Ccnd1/Lsm11	2
WT<CST	MF	GO:1901681	sulfur compound binding	5/130	198/13889	0.0384315910846273	0.317837494294494	0.290173559771502	Ptn/Anxa4/Adamts8/Colq/Lipg	5
CST<WT	CC	GO:0044304	main axon	3/129	82/14212	0.0385212136924073	0.153518366332976	0.121049634358494	Nav1/Cntnap2/Ank3	3
CST<WT	BP	GO:0002028	regulation of sodium ion transport	3/127	82/13966	0.0386900036814417	0.230703512050973	0.196776673231303	Atp2b4/Scn3b/Ank3	3
CST<WT	BP	GO:0008217	regulation of blood pressure	4/127	140/13966	0.0388667030119271	0.230882794115292	0.196929590401368	Cd34/Npy1r/Agtr2/Ar	4
WT<CST	MF	GO:0004175	endopeptidase activity	6/130	266/13889	0.0389744227944996	0.317837494294494	0.290173559771502	Ecel1/Pamr1/Pappa/Htra4/Adamts8/Plau	6
WT<CST	MF	GO:0008528	G protein-coupled peptide receptor activity	3/130	80/13889	0.0390868115960867	0.317837494294494	0.290173559771502	Hcrtr1/Hcrtr2/Ramp3	3
CST<WT	BP	GO:0071407	cellular response to organic cyclic compound	7/127	347/13966	0.0391437278176766	0.230882794115292	0.196929590401368	Atp2b4/Rapgef2/Epha5/Ryr2/Mapk1/Agtr2/Ar	7
WT<CST	BP	GO:0007009	plasma membrane organization	3/131	80/13966	0.0392983662702602	0.435390374327572	0.408759099653197	Pacsin3/Dmkn/Nox1	3
WT<CST	BP	GO:0120162	positive regulation of cold-induced thermogenesis	3/131	80/13966	0.0392983662702602	0.435390374327572	0.408759099653197	Ache/Irf4/Adcyap1	3
WT<CST	BP	GO:2000379	positive regulation of reactive oxygen species metabolic process	3/131	80/13966	0.0392983662702602	0.435390374327572	0.408759099653197	Ddah1/Plau/Nox1	3
CST<WT	BP	GO:0009749	response to glucose	4/127	141/13966	0.0397300829032168	0.230882794115292	0.196929590401368	Cacna1e/Epha5/Igf1r/Gpr68	4
CST<WT	BP	GO:0035150	regulation of tube size	4/127	141/13966	0.0397300829032168	0.230882794115292	0.196929590401368	Npy1r/Chrm3/Htr1a/Agtr2	4
CST<WT	BP	GO:0050880	regulation of blood vessel size	4/127	141/13966	0.0397300829032168	0.230882794115292	0.196929590401368	Npy1r/Chrm3/Htr1a/Agtr2	4
CST<WT	BP	GO:0097164	ammonium ion metabolic process	4/127	141/13966	0.0397300829032168	0.230882794115292	0.196929590401368	Moxd1/Pla2g3/Htr1a/Agtr2	4
CST<WT	BP	GO:0042310	vasoconstriction	3/127	83/13966	0.0398824092799892	0.230882794115292	0.196929590401368	Npy1r/Chrm3/Htr1a	3
CST<WT	BP	GO:0042476	odontogenesis	3/127	83/13966	0.0398824092799892	0.230882794115292	0.196929590401368	Cd34/Slc24a4/Fgf10	3
WT<CST	BP	GO:0006836	neurotransmitter transport	6/131	267/13966	0.0399327915338875	0.438280257477087	0.411472218968531	Syt2/Cadps2/Sphk1/Adcyap1/Syt12/Apln	6
WT<CST	BP	GO:0006575	cellular modified amino acid metabolic process	4/131	137/13966	0.0400062040226408	0.438280257477087	0.411472218968531	Serinc2/Slc5a5/Gpx1/Mthfd1l	4
CST<WT	BP	GO:0003382	epithelial cell morphogenesis	2/127	35/13966	0.0401576964442953	0.230882794115292	0.196929590401368	Met/Ar	2
CST<WT	BP	GO:0007431	salivary gland development	2/127	35/13966	0.0401576964442953	0.230882794115292	0.196929590401368	Met/Fgf10	2
CST<WT	BP	GO:0016601	Rac protein signal transduction	2/127	35/13966	0.0401576964442953	0.230882794115292	0.196929590401368	Rhou/Wasf1	2
CST<WT	BP	GO:0019098	reproductive behavior	2/127	35/13966	0.0401576964442953	0.230882794115292	0.196929590401368	Gnaq/Ar	2
CST<WT	BP	GO:0032653	regulation of interleukin-10 production	2/127	35/13966	0.0401576964442953	0.230882794115292	0.196929590401368	Fcer1g/Cd34	2
CST<WT	BP	GO:0032781	positive regulation of ATPase activity	2/127	35/13966	0.0401576964442953	0.230882794115292	0.196929590401368	Ryr2/Fgf10	2
CST<WT	BP	GO:0060603	mammary gland duct morphogenesis	2/127	35/13966	0.0401576964442953	0.230882794115292	0.196929590401368	Fgf10/Ar	2
WT<CST	BP	GO:0090279	regulation of calcium ion import	2/131	34/13966	0.0402890927678524	0.438927282876436	0.41207966813435	Serpine1/Ramp3	2
CST<WT	MF	GO:0043548	phosphatidylinositol 3-kinase binding	2/123	36/13889	0.0402949345775092	0.238411696250263	0.205716244948337	Met/Igf1r	2
WT<CST	BP	GO:0051480	regulation of cytosolic calcium ion concentration	6/131	268/13966	0.040545238703106	0.439277420424259	0.412408389018508	Bok/Hcrtr1/Hcrtr2/Ramp3/Chga/Adcyap1	6
WT<CST	CC	GO:0009925	basal plasma membrane	2/134	34/14212	0.0406722108582508	0.427058214011634	0.406722108582508	Itga9/Myo1c	2
CST<WT	BP	GO:0009636	response to toxic substance	6/127	278/13966	0.0414543837257198	0.237407275384635	0.202494593323636	Chrna4/Met/Grin2b/Igf1r/Glra3/Mapk1	6
CST<WT	BP	GO:0009746	response to hexose	4/127	143/13966	0.0414896068646457	0.237407275384635	0.202494593323636	Cacna1e/Epha5/Igf1r/Gpr68	4
WT<CST	BP	GO:2001234	negative regulation of apoptotic signaling pathway	5/131	202/13966	0.0416277583673021	0.448237158350074	0.420820091765361	Scg2/Bok/Creb3l1/Serpine1/Gpx1	5
WT<CST	BP	GO:0097529	myeloid leukocyte migration	4/131	139/13966	0.041829372757809	0.448237158350074	0.420820091765361	Scg2/Serpine1/Itga9/Chga	4
CST<WT	BP	GO:0048169	regulation of long-term neuronal synaptic plasticity	2/127	36/13966	0.0422721445764395	0.239688451673876	0.204440303977368	Grin2b/Grm5	2
CST<WT	BP	GO:0048806	genitalia development	2/127	36/13966	0.0422721445764395	0.239688451673876	0.204440303977368	Fgf10/Ar	2
CST<WT	BP	GO:0000187	activation of MAPK activity	3/127	85/13966	0.042322732716207	0.239688451673876	0.204440303977368	Met/Ntrk3/Fgf10	3
CST<WT	BP	GO:0003300	cardiac muscle hypertrophy	3/127	85/13966	0.042322732716207	0.239688451673876	0.204440303977368	Atp2b4/Ryr2/Agtr2	3
CST<WT	MF	GO:0004715	non-membrane spanning protein tyrosine kinase activity	2/123	37/13889	0.0423558941229013	0.242521651832741	0.209262566889037	Peak1/Sla	2
CST<WT	MF	GO:0099529	neurotransmitter receptor activity involved in regulation of postsynaptic membrane potential	2/123	37/13889	0.0423558941229013	0.242521651832741	0.209262566889037	Chrna4/Grin2b	2
CST<WT	BP	GO:0034284	response to monosaccharide	4/127	144/13966	0.0423857535961276	0.239688451673876	0.204440303977368	Cacna1e/Epha5/Igf1r/Gpr68	4
WT<CST	BP	GO:0002437	inflammatory response to antigenic stimulus	2/131	35/13966	0.0424739089448675	0.450223434815596	0.422684874791313	Gpx1/Adcyap1	2
WT<CST	BP	GO:0033628	regulation of cell adhesion mediated by integrin	2/131	35/13966	0.0424739089448675	0.450223434815596	0.422684874791313	Serpine1/Plau	2
WT<CST	BP	GO:0008217	regulation of blood pressure	4/131	140/13966	0.0427583939991334	0.450802207700541	0.423228246205345	Ddah1/Npy/Apln/Nox1	4
WT<CST	BP	GO:2001237	negative regulation of extrinsic apoptotic signaling pathway	3/131	83/13966	0.043078279590871	0.45174602287539	0.424114331575758	Scg2/Serpine1/Gpx1	3
CST<WT	BP	GO:0007631	feeding behavior	3/127	86/13966	0.0435704987006081	0.24466510808803	0.208685102352072	Grin2b/Npy1r/Htr1a	3
CST<WT	BP	GO:0035270	endocrine system development	3/127	86/13966	0.0435704987006081	0.24466510808803	0.208685102352072	Igf1r/Fgf10/Mapk1	3
CST<WT	BP	GO:0097061	dendritic spine organization	3/127	86/13966	0.0435704987006081	0.24466510808803	0.208685102352072	Epha5/Grin2b/Igf1r	3
WT<CST	BP	GO:0035150	regulation of tube size	4/131	141/13966	0.0436990382934897	0.451860474942624	0.42422178301868	Gpx1/Chga/Adcyap1/Apln	4
WT<CST	BP	GO:0050880	regulation of blood vessel size	4/131	141/13966	0.0436990382934897	0.451860474942624	0.42422178301868	Gpx1/Chga/Adcyap1/Apln	4
CST<WT	BP	GO:0046777	protein autophosphorylation	5/127	212/13966	0.0442669868262392	0.246603277144603	0.210338247792823	Met/Prkcg/Igf1r/Peak1/Sla	5
CST<WT	BP	GO:0002448	mast cell mediated immunity	2/127	37/13966	0.0444274895312401	0.246603277144603	0.210338247792823	Fcer1g/Pla2g3	2
CST<WT	BP	GO:0032613	interleukin-10 production	2/127	37/13966	0.0444274895312401	0.246603277144603	0.210338247792823	Fcer1g/Cd34	2
CST<WT	BP	GO:0043303	mast cell degranulation	2/127	37/13966	0.0444274895312401	0.246603277144603	0.210338247792823	Fcer1g/Pla2g3	2
CST<WT	BP	GO:0045823	positive regulation of heart contraction	2/127	37/13966	0.0444274895312401	0.246603277144603	0.210338247792823	Scn3b/Ryr2	2
WT<CST	BP	GO:0006040	amino sugar metabolic process	2/131	36/13966	0.0447021581534263	0.451860474942624	0.42422178301868	Uap1l1/Chil3	2
WT<CST	BP	GO:0014046	dopamine secretion	2/131	36/13966	0.0447021581534263	0.451860474942624	0.42422178301868	Syt2/Syt12	2
WT<CST	BP	GO:0014059	regulation of dopamine secretion	2/131	36/13966	0.0447021581534263	0.451860474942624	0.42422178301868	Syt2/Syt12	2
WT<CST	BP	GO:0045910	negative regulation of DNA recombination	2/131	36/13966	0.0447021581534263	0.451860474942624	0.42422178301868	Hist1h1e/Hist1h1c	2
WT<CST	BP	GO:1904036	negative regulation of epithelial cell apoptotic process	2/131	36/13966	0.0447021581534263	0.451860474942624	0.42422178301868	Scg2/Serpine1	2
WT<CST	BP	GO:0046879	hormone secretion	6/131	275/13966	0.0449996370227855	0.452534811290679	0.424854872619983	Vgf/Pde4c/Chga/Crhbp/Adcyap1/Apln	6
CST<WT	BP	GO:0007264	small GTPase mediated signal transduction	8/127	435/13966	0.0450021516548217	0.248712532072983	0.212137319528287	Rapgef2/Ksr2/Met/Psd3/Rhou/Arhgap32/Wasf1/Fgf10	8
CST<WT	BP	GO:0046677	response to antibiotic	5/127	213/13966	0.0450139742564634	0.248712532072983	0.212137319528287	Epha5/Met/Grin2b/Igf1r/Glra3	5
CST<WT	BP	GO:0071695	anatomical structure maturation	4/127	147/13966	0.0451397193145986	0.248836576267432	0.212243122009145	Adgrb3/Rere/Cntnap2/Gnaq	4
WT<CST	MF	GO:0099106	ion channel regulator activity	3/130	85/13889	0.0454532187123017	0.360129348259006	0.328784416056595	Pacsin3/Kcnip3/Lynx1	3
WT<CST	BP	GO:0055065	metal ion homeostasis	9/131	500/13966	0.0457167457018435	0.456599664810218	0.428671093562935	Bok/Hcrtr1/Rhd/Ank1/Slc12a4/Hcrtr2/Ramp3/Chga/Adcyap1	9
CST<WT	BP	GO:0046942	carboxylic acid transport	5/127	214/13966	0.0457685049063661	0.251726776985013	0.214708295066634	Grin2b/Dpysl2/Slc38a2/Syt4/Agtr2	5
CST<WT	BP	GO:0035725	sodium ion transmembrane transport	3/127	88/13966	0.0461208349892771	0.251938982968636	0.21488929442432	Atp2b4/Scn3b/Ank3	3
CST<WT	BP	GO:0060291	long-term synaptic potentiation	3/127	88/13966	0.0461208349892771	0.251938982968636	0.21488929442432	Grin2b/Shisa7/Mapk1	3
CST<WT	BP	GO:0097756	negative regulation of blood vessel diameter	3/127	88/13966	0.0461208349892771	0.251938982968636	0.21488929442432	Npy1r/Chrm3/Htr1a	3
CST<WT	BP	GO:0015849	organic acid transport	5/127	215/13966	0.0465305862972111	0.252391880880896	0.215275589993449	Grin2b/Dpysl2/Slc38a2/Syt4/Agtr2	5
CST<WT	BP	GO:0002279	mast cell activation involved in immune response	2/127	38/13966	0.0466228256504768	0.252391880880896	0.215275589993449	Fcer1g/Pla2g3	2
CST<WT	BP	GO:0010765	positive regulation of sodium ion transport	2/127	38/13966	0.0466228256504768	0.252391880880896	0.215275589993449	Scn3b/Ank3	2
CST<WT	BP	GO:0032941	secretion by tissue	2/127	38/13966	0.0466228256504768	0.252391880880896	0.215275589993449	Chrm3/Fgf10	2
WT<CST	BP	GO:1903532	positive regulation of secretion by cell	7/131	350/13966	0.0467865485759326	0.456599664810218	0.428671093562935	Syt2/Crlf2/Cadps2/Sphk1/H2-T23/Adcyap1/Apln	7
WT<CST	BP	GO:0032355	response to estradiol	2/131	37/13966	0.0469728471571869	0.456599664810218	0.428671093562935	Ramp3/Crhbp	2
WT<CST	BP	GO:0032965	regulation of collagen biosynthetic process	2/131	37/13966	0.0469728471571869	0.456599664810218	0.428671093562935	Creb3l1/Serpine1	2
WT<CST	BP	GO:0042743	hydrogen peroxide metabolic process	2/131	37/13966	0.0469728471571869	0.456599664810218	0.428671093562935	Gpx1/Nox1	2
WT<CST	BP	GO:0045823	positive regulation of heart contraction	2/131	37/13966	0.0469728471571869	0.456599664810218	0.428671093562935	Chga/Apln	2
CST<WT	BP	GO:0048754	branching morphogenesis of an epithelial tube	4/127	149/13966	0.047030262232513	0.254026685466646	0.216669983190619	Met/Fgf10/Agtr2/Ar	4
WT<CST	BP	GO:0001906	cell killing	3/131	86/13966	0.0470337237591351	0.456599664810218	0.428671093562935	H60b/H2-D1/H2-T23	3
CST<WT	BP	GO:0051054	positive regulation of DNA metabolic process	5/127	216/13966	0.0473002253046981	0.254913294762903	0.217426209336561	Met/Prkcg/Igf1r/Fgf10/Mapk1	5
CST<WT	MF	GO:0005096	GTPase activator activity	5/123	222/13889	0.0474309540908145	0.267269661940304	0.230616669012983	Adgrb3/Rapgef2/Arhgap32/Fam13b/Gnaq	5
WT<CST	BP	GO:0030595	leukocyte chemotaxis	4/131	145/13966	0.0475777605396127	0.459605854276751	0.431493405153137	Scg2/Serpine1/Itga9/Chga	4
WT<CST	MF	GO:0001653	peptide receptor activity	3/130	87/13889	0.0481351964893312	0.369057295043449	0.336935292357842	Hcrtr1/Hcrtr2/Ramp3	3
CST<WT	BP	GO:0009611	response to wounding	7/127	364/13966	0.0484669662283773	0.259157369346529	0.221046158032127	Fcer1g/Cd34/Igf1r/Ntrk3/Lyst/Fgf10/Matn2	7
CST<WT	BP	GO:0048565	digestive tract development	3/127	90/13966	0.048743668229953	0.259157369346529	0.221046158032127	Cbfa2t2/Sox11/Fgf10	3
CST<WT	MF	GO:0005245	voltage-gated calcium channel activity	2/123	40/13889	0.0487679176070973	0.270509542976868	0.233412237231338	Cacna1e/Cacnb2	2
CST<WT	BP	GO:0001941	postsynaptic membrane organization	2/127	39/13966	0.0488572601344742	0.259157369346529	0.221046158032127	Shisa7/Htr1a	2
CST<WT	BP	GO:0014888	striated muscle adaptation	2/127	39/13966	0.0488572601344742	0.259157369346529	0.221046158032127	Atp2b4/Ar	2
CST<WT	BP	GO:0044786	cell cycle DNA replication	2/127	39/13966	0.0488572601344742	0.259157369346529	0.221046158032127	Rny3/Rny1	2
CST<WT	BP	GO:0045740	positive regulation of DNA replication	2/127	39/13966	0.0488572601344742	0.259157369346529	0.221046158032127	Met/Fgf10	2
CST<WT	BP	GO:0048736	appendage development	4/127	151/13966	0.0489643962401679	0.259157369346529	0.221046158032127	Dync2h1/Sox11/Fgf10/Gnaq	4
CST<WT	BP	GO:0060173	limb development	4/127	151/13966	0.0489643962401679	0.259157369346529	0.221046158032127	Dync2h1/Sox11/Fgf10/Gnaq	4
WT<CST	MF	GO:0008233	peptidase activity	8/130	430/13889	0.0489687673034997	0.369057295043449	0.336935292357842	Ecel1/Pamr1/Pappa/Otud7a/Htra4/Adamts8/Papln/Plau	8
CST<WT	BP	GO:0071900	regulation of protein serine/threonine kinase activity	7/127	365/13966	0.0490559403993429	0.259157369346529	0.221046158032127	Atp2b4/Rapgef2/Met/Igf1r/Ntrk3/Grm5/Fgf10	7
WT<CST	BP	GO:0002228	natural killer cell mediated immunity	2/131	38/13966	0.0492849972782777	0.46034433039698	0.432186711325756	H60b/H2-T23	2
WT<CST	BP	GO:0002711	positive regulation of T cell mediated immunity	2/131	38/13966	0.0492849972782777	0.46034433039698	0.432186711325756	H2-D1/H2-T23	2
WT<CST	BP	GO:0038179	neurotrophin signaling pathway	2/131	38/13966	0.0492849972782777	0.46034433039698	0.432186711325756	Bdnf/Tmem108	2
WT<CST	BP	GO:0042267	natural killer cell mediated cytotoxicity	2/131	38/13966	0.0492849972782777	0.46034433039698	0.432186711325756	H60b/H2-T23	2
WT<CST	BP	GO:0050829	defense response to Gram-negative bacterium	2/131	38/13966	0.0492849972782777	0.46034433039698	0.432186711325756	Serpine1/Chga	2
WT<CST	BP	GO:0009914	hormone transport	6/131	282/13966	0.0497495589438501	0.46034433039698	0.432186711325756	Vgf/Pde4c/Chga/Crhbp/Adcyap1/Apln	6
WT<CST	BP	GO:0006334	nucleosome assembly	3/131	88/13966	0.0497669546375113	0.46034433039698	0.432186711325756	Hist1h4k/Hist1h1e/Hist1h1c	3
WT<CST	BP	GO:0015844	monoamine transport	3/131	88/13966	0.0497669546375113	0.46034433039698	0.432186711325756	Syt2/Chga/Syt12	3
WT<CST	BP	GO:0035967	cellular response to topologically incorrect protein	3/131	88/13966	0.0497669546375113	0.46034433039698	0.432186711325756	Bok/Creb3l1/Ccnd1	3
CST<WT	BP	GO:0007519	skeletal muscle tissue development	4/127	152/13966	0.0499477867651915	0.263291506164871	0.224572336210189	Foxp2/Met/Hlf/Sox11	4
CST<WT	MF	GO:0015293	symporter activity	3/123	94/13889	0.0508199973662305	0.273688468150381	0.236155208989654	Slc24a4/Slc38a2/Slc4a8	3
WT<CST	MF	GO:0008236	serine-type peptidase activity	3/130	89/13889	0.0508934043604033	0.374430046365824	0.341840410240303	Pamr1/Htra4/Plau	3
CST<WT	MF	GO:0017046	peptide hormone binding	2/123	41/13889	0.0509788936497618	0.273688468150381	0.236155208989654	Igf1r/Agtr2	2
CST<WT	BP	GO:0033173	calcineurin-NFAT signaling cascade	2/127	40/13966	0.0511299128861854	0.267057722923035	0.227784699982855	Atp2b4/Dyrk2	2
CST<WT	BP	GO:0048546	digestive tract morphogenesis	2/127	40/13966	0.0511299128861854	0.267057722923035	0.227784699982855	Sox11/Fgf10	2
CST<WT	BP	GO:0097720	calcineurin-mediated signaling	2/127	40/13966	0.0511299128861854	0.267057722923035	0.227784699982855	Atp2b4/Dyrk2	2
WT<CST	BP	GO:0099565	chemical synaptic transmission, postsynaptic	3/131	89/13966	0.0511621465435561	0.466642489887847	0.438099634887595	Bdnf/Insyn1/Tmem108	3
CST<WT	BP	GO:0048511	rhythmic process	5/127	221/13966	0.0512619802726336	0.267057722923035	0.227784699982855	Grin2b/Prkcg/Igf1r/Ntrk3/Hlf	5
CST<WT	BP	GO:0032414	positive regulation of ion transmembrane transporter activity	3/127	92/13966	0.0514382662666202	0.267057722923035	0.227784699982855	Cacnb2/Ank3/Ryr2	3
CST<WT	BP	GO:0140029	exocytic process	3/127	92/13966	0.0514382662666202	0.267057722923035	0.227784699982855	Fcer1g/Pclo/Syt1	3
CST<WT	BP	GO:1901654	response to ketone	3/127	92/13966	0.0514382662666202	0.267057722923035	0.227784699982855	Epha5/Agtr2/Ar	3
WT<CST	BP	GO:0001881	receptor recycling	2/131	39/13966	0.0516376442150244	0.466642489887847	0.438099634887595	Ache/Ramp3	2
WT<CST	BP	GO:0001941	postsynaptic membrane organization	2/131	39/13966	0.0516376442150244	0.466642489887847	0.438099634887595	Ptn/Colq	2
WT<CST	BP	GO:0031638	zymogen activation	2/131	39/13966	0.0516376442150244	0.466642489887847	0.438099634887595	Serpine1/Plau	2
WT<CST	BP	GO:0044060	regulation of endocrine process	2/131	39/13966	0.0516376442150244	0.466642489887847	0.438099634887595	Crhbp/Apln	2
CST<WT	BP	GO:0015711	organic anion transport	6/127	294/13966	0.0518595431779852	0.268665891431756	0.229156374156032	Grin2b/Dpysl2/Slc38a2/Slc4a8/Syt4/Agtr2	6
CST<WT	BP	GO:0043266	regulation of potassium ion transport	3/127	93/13966	0.0528122358935683	0.272624214208593	0.232532593185717	Ank3/Gnaq/Fhl1	3
CST<WT	MF	GO:0001077	proximal promoter DNA-binding transcription activator activity, RNA polymerase II-specific	5/123	229/13889	0.0528874691139079	0.273688468150381	0.236155208989654	Hlf/Sox11/Etv1/Ssbp2/Ar	5
CST<WT	BP	GO:0009743	response to carbohydrate	4/127	155/13966	0.0529631101077714	0.272624214208593	0.232532593185717	Cacna1e/Epha5/Igf1r/Gpr68	4
CST<WT	BP	GO:0021953	central nervous system neuron differentiation	4/127	155/13966	0.0529631101077714	0.272624214208593	0.232532593185717	Rapgef2/Dync2h1/Faim2/Gnaq	4
CST<WT	MF	GO:0035255	ionotropic glutamate receptor binding	2/123	42/13889	0.0532253422229203	0.273688468150381	0.236155208989654	Grin2b/Shisa7	2
CST<WT	BP	GO:0060428	lung epithelium development	2/127	41/13966	0.0534399163570124	0.27449202239668	0.234125724899311	Foxp2/Fgf10	2
WT<CST	BP	GO:1904019	epithelial cell apoptotic process	3/131	91/13966	0.0540091449430621	0.48380142487189	0.45420901908314	Scg2/Bok/Serpine1	3
WT<CST	BP	GO:0045933	positive regulation of muscle contraction	2/131	40/13966	0.0540298378617766	0.48380142487189	0.45420901908314	Sphk1/Chga	2
CST<WT	BP	GO:0008344	adult locomotory behavior	3/127	94/13966	0.0542038518962588	0.277233713838827	0.236464228185266	Sez6l/Chl1/Sez6	3
CST<WT	BP	GO:0106027	neuron projection organization	3/127	94/13966	0.0542038518962588	0.277233713838827	0.236464228185266	Epha5/Grin2b/Igf1r	3
CST<WT	BP	GO:0045860	positive regulation of protein kinase activity	7/127	374/13966	0.0545627880398393	0.278478297432146	0.237525785579318	Atp2b4/Pak7/Rapgef2/Met/Ntrk3/Grm5/Fgf10	7
CST<WT	MF	GO:0003714	transcription corepressor activity	4/123	161/13889	0.0548005618364266	0.273688468150381	0.236155208989654	Cbfa2t2/Runx1t1/Rere/Crym	4
WT<CST	BP	GO:0031348	negative regulation of defense response	4/131	152/13966	0.0548112651640894	0.488567686303542	0.458683745320537	Gpx1/Serpinf1/H2-T23/Adcyap1	4
CST<WT	MF	GO:0001786	phosphatidylserine binding	2/123	43/13889	0.0555064731728966	0.273688468150381	0.236155208989654	Syt1/Syt4	2
CST<WT	MF	GO:0008375	acetylglucosaminyltransferase activity	2/123	43/13889	0.0555064731728966	0.273688468150381	0.236155208989654	Ndst3/Mgat4c	2
CST<WT	BP	GO:0035249	synaptic transmission, glutamatergic	3/127	95/13966	0.0556130105233248	0.282330829170116	0.240811771007873	Grik3/Grm5/Syt1	3
WT<CST	CC	GO:0030017	sarcomere	4/134	152/14212	0.0556808854079543	0.538286497726712	0.512653807358774	Igfn1/Ank1/Pdlim3/Myl4	4
CST<WT	BP	GO:0010799	regulation of peptidyl-threonine phosphorylation	2/127	42/13966	0.0557864153943443	0.282330829170116	0.240811771007873	Met/Mapk1	2
CST<WT	BP	GO:0014014	negative regulation of gliogenesis	2/127	42/13966	0.0557864153943443	0.282330829170116	0.240811771007873	Ntrk3/Sox11	2
CST<WT	BP	GO:0034198	cellular response to amino acid starvation	2/127	42/13966	0.0557864153943443	0.282330829170116	0.240811771007873	Rnf152/Mapk1	2
WT<CST	BP	GO:2001242	regulation of intrinsic apoptotic signaling pathway	4/131	153/13966	0.0558907096870054	0.489968888994605	0.45999924144586	Bok/Creb3l1/Gpx1/Nox1	4
CST<WT	BP	GO:0060538	skeletal muscle organ development	4/127	158/13966	0.0560758519022384	0.283200686021997	0.241553708293434	Foxp2/Met/Hlf/Sox11	4
WT<CST	BP	GO:1902808	positive regulation of cell cycle G1/S phase transition	2/131	41/13966	0.0564606421308059	0.489968888994605	0.45999924144586	Ccnd1/Lsm11	2
WT<CST	BP	GO:2000351	regulation of endothelial cell apoptotic process	2/131	41/13966	0.0564606421308059	0.489968888994605	0.45999924144586	Scg2/Serpine1	2
CST<WT	MF	GO:0005244	voltage-gated ion channel activity	4/123	163/13889	0.0568476129117038	0.273688468150381	0.236155208989654	Cacna1e/Cacnb2/Grin2b/Scn3b	4
CST<WT	MF	GO:0022832	voltage-gated channel activity	4/123	163/13889	0.0568476129117038	0.273688468150381	0.236155208989654	Cacna1e/Cacnb2/Grin2b/Scn3b	4
WT<CST	BP	GO:0007189	adenylate cyclase-activating G protein-coupled receptor signaling pathway	3/131	93/13966	0.0569308769029983	0.489968888994605	0.45999924144586	Ramp3/Chga/Adcyap1	3
WT<CST	BP	GO:0048871	multicellular organismal homeostasis	7/131	367/13966	0.0575476901960927	0.489968888994605	0.45999924144586	Rhd/Ache/Gpx1/Irf4/Col11a2/Adcyap1/Apln	7
CST<WT	MF	GO:0035591	signaling adaptor activity	2/123	44/13889	0.0578215073557142	0.273688468150381	0.236155208989654	Ksr2/Sla	2
CST<WT	MF	GO:0099516	ion antiporter activity	2/123	44/13889	0.0578215073557142	0.273688468150381	0.236155208989654	Slc24a4/Slc4a8	2
WT<CST	CC	GO:0098797	plasma membrane protein complex	8/134	442/14212	0.0578553312488558	0.538286497726712	0.512653807358774	Kcnip3/Cdh22/Kcng4/Itga9/Ramp3/H2-D1/H2-T23/Nox1	8
WT<CST	BP	GO:0007219	Notch signaling pathway	4/131	155/13966	0.058083973800751	0.489968888994605	0.45999924144586	Maml3/Anxa4/Gdpd5/Tmem100	4
WT<CST	MF	GO:0015293	symporter activity	3/130	94/13889	0.0581168107033921	0.411124179420508	0.37534075995468	Slc5a5/Slc12a4/Slc38a3	3
CST<WT	BP	GO:0000245	spliceosomal complex assembly	2/127	43/13966	0.0581685670907975	0.29193349608694	0.249002287195694	Celf2/Celf1	2
CST<WT	BP	GO:0048010	vascular endothelial growth factor receptor signaling pathway	2/127	43/13966	0.0581685670907975	0.29193349608694	0.249002287195694	Fgf10/Vegfd	2
CST<WT	BP	GO:1900271	regulation of long-term synaptic potentiation	2/127	43/13966	0.0581685670907975	0.29193349608694	0.249002287195694	Grin2b/Shisa7	2
WT<CST	CC	GO:0030133	transport vesicle	6/134	292/14212	0.0582561144725879	0.538286497726712	0.512653807358774	Syt2/Bdnf/Sphk1/Kif3c/Nrsn1/Syt12	6
WT<CST	BP	GO:0045446	endothelial cell differentiation	3/131	94/13966	0.0584194751506088	0.489968888994605	0.45999924144586	Gpx1/Tmem100/Tnmd	3
CST<WT	CC	GO:0009897	external side of plasma membrane	5/129	230/14212	0.0585265527463052	0.227188464556939	0.179138699961385	Astn1/Fcer1g/Cd34/Chrna4/Epha5	5
CST<WT	CC	GO:0098552	side of membrane	7/129	381/14212	0.0586833672287296	0.227188464556939	0.179138699961385	Astn1/Fcer1g/Cd34/Chrna4/Epha5/Ryr2/Gnaq	7
WT<CST	BP	GO:0014009	glial cell proliferation	2/131	42/13966	0.0589291347762577	0.489968888994605	0.45999924144586	Ptn/Adcyap1	2
WT<CST	BP	GO:0014014	negative regulation of gliogenesis	2/131	42/13966	0.0589291347762577	0.489968888994605	0.45999924144586	Ptn/Adcyap1	2
WT<CST	BP	GO:0018023	peptidyl-lysine trimethylation	2/131	42/13966	0.0589291347762577	0.489968888994605	0.45999924144586	Hist1h1e/Hist1h1c	2
WT<CST	BP	GO:0007416	synapse assembly	4/131	156/13966	0.0591977478091735	0.489968888994605	0.45999924144586	Bdnf/Ache/Colq/Srpx2	4
WT<CST	BP	GO:0045055	regulated exocytosis	5/131	224/13966	0.0598245821360973	0.489968888994605	0.45999924144586	Syt2/Cadps2/Chga/Crhbp/Syt12	5
CST<WT	BP	GO:0032411	positive regulation of transporter activity	3/127	98/13966	0.0599446677971633	0.300221839341718	0.256071761768383	Cacnb2/Ank3/Ryr2	3
CST<WT	MF	GO:0030695	GTPase regulator activity	5/123	238/13889	0.0604211158949971	0.282230212404263	0.243525550213908	Adgrb3/Rapgef2/Arhgap32/Fam13b/Gnaq	5
CST<WT	BP	GO:0006414	translational elongation	2/127	44/13966	0.0605855406351374	0.301550759070343	0.257205252979096	Cpeb2/Grm5	2
CST<WT	BP	GO:0045010	actin nucleation	2/127	44/13966	0.0605855406351374	0.301550759070343	0.257205252979096	Wasf1/Wipf2	2
CST<WT	BP	GO:0048538	thymus development	2/127	44/13966	0.0605855406351374	0.301550759070343	0.257205252979096	Fgf10/Mapk1	2
WT<CST	BP	GO:0051047	positive regulation of secretion	7/131	372/13966	0.0609831107689863	0.489968888994605	0.45999924144586	Syt2/Crlf2/Cadps2/Sphk1/H2-T23/Adcyap1/Apln	7
WT<CST	MF	GO:0008083	growth factor activity	3/130	96/13889	0.0611349124902397	0.411124179420508	0.37534075995468	Bdnf/Ptn/Gkn1	3
WT<CST	MF	GO:0001786	phosphatidylserine binding	2/130	43/13889	0.0612029522761922	0.411124179420508	0.37534075995468	Syt2/Syt12	2
WT<CST	MF	GO:0015179	L-amino acid transmembrane transporter activity	2/130	43/13889	0.0612029522761922	0.411124179420508	0.37534075995468	Slc7a10/Slc38a3	2
WT<CST	BP	GO:0060351	cartilage development involved in endochondral bone morphogenesis	2/131	43/13966	0.0614344072201313	0.489968888994605	0.45999924144586	Col27a1/Vwa1	2
WT<CST	BP	GO:0060986	endocrine hormone secretion	2/131	43/13966	0.0614344072201313	0.489968888994605	0.45999924144586	Crhbp/Apln	2
WT<CST	BP	GO:0072577	endothelial cell apoptotic process	2/131	43/13966	0.0614344072201313	0.489968888994605	0.45999924144586	Scg2/Serpine1	2
CST<WT	BP	GO:0003018	vascular process in circulatory system	4/127	163/13966	0.0614788889723614	0.305060581704839	0.260198927481526	Npy1r/Chrm3/Htr1a/Agtr2	4
CST<WT	BP	GO:0016050	vesicle organization	5/127	233/13966	0.0615439778781868	0.305060581704839	0.260198927481526	Cd34/Syt1/Pla2g3/Lyst/Syt4	5
WT<CST	BP	GO:0046883	regulation of hormone secretion	5/131	226/13966	0.0616724335109623	0.489968888994605	0.45999924144586	Pde4c/Chga/Crhbp/Adcyap1/Apln	5
WT<CST	BP	GO:0072593	reactive oxygen species metabolic process	5/131	226/13966	0.0616724335109623	0.489968888994605	0.45999924144586	Ddah1/Gpx1/Plau/Nox1/Gla	5
WT<CST	CC	GO:0070382	exocytic vesicle	5/134	225/14212	0.0618602763542185	0.549604762993249	0.523433107612618	Syt2/Bdnf/Sphk1/Kif3c/Syt12	5
WT<CST	BP	GO:2000377	regulation of reactive oxygen species metabolic process	4/131	159/13966	0.0626073361317529	0.489968888994605	0.45999924144586	Ddah1/Plau/Nox1/Gla	4
CST<WT	BP	GO:1990778	protein localization to cell periphery	6/127	309/13966	0.0629494828284455	0.311178216906065	0.265416914378379	Fcer1g/Cacnb2/Rapgef2/Scn3b/Ank3/Ar	6
WT<CST	BP	GO:0016999	antibiotic metabolic process	3/131	97/13966	0.0629947294680077	0.489968888994605	0.45999924144586	Gpx1/Mthfd1l/Nox1	3
CST<WT	BP	GO:0048016	inositol phosphate-mediated signaling	2/127	45/13966	0.063036517164865	0.311178216906065	0.265416914378379	Atp2b4/Dyrk2	2
CST<WT	BP	GO:0090287	regulation of cellular response to growth factor stimulus	5/127	235/13966	0.0633638019495156	0.312154189972153	0.266249362620718	Wasf1/Sox11/Fgf10/Agtr2/Vegfd	5
CST<WT	BP	GO:0044843	cell cycle G1/S phase transition	4/127	165/13966	0.0637148800610684	0.312704686797905	0.266718904384659	Atp2b4/Rhou/Fgf10/Fhl1	4
CST<WT	BP	GO:0060562	epithelial tube morphogenesis	6/127	310/13966	0.0637351603228607	0.312704686797905	0.266718904384659	Met/Sox11/Ryr2/Fgf10/Agtr2/Ar	6
WT<CST	MF	GO:0016879	ligase activity, forming carbon-nitrogen bonds	2/130	44/13889	0.0637353627993166	0.412183184347235	0.376307591228271	Mthfd1l/Adssl1	2
WT<CST	BP	GO:0051588	regulation of neurotransmitter transport	4/131	160/13966	0.0637665296245667	0.489968888994605	0.45999924144586	Syt2/Sphk1/Syt12/Apln	4
WT<CST	BP	GO:0008631	intrinsic apoptotic signaling pathway in response to oxidative stress	2/131	44/13966	0.0639755643802673	0.489968888994605	0.45999924144586	Gpx1/Nox1	2
WT<CST	BP	GO:0010712	regulation of collagen metabolic process	2/131	44/13966	0.0639755643802673	0.489968888994605	0.45999924144586	Creb3l1/Serpine1	2
WT<CST	BP	GO:0030858	positive regulation of epithelial cell differentiation	2/131	44/13966	0.0639755643802673	0.489968888994605	0.45999924144586	Serpine1/Tmem100	2
WT<CST	BP	GO:0032677	regulation of interleukin-8 production	2/131	44/13966	0.0639755643802673	0.489968888994605	0.45999924144586	Serpine1/Anxa4	2
WT<CST	BP	GO:1902041	regulation of extrinsic apoptotic signaling pathway via death domain receptors	2/131	44/13966	0.0639755643802673	0.489968888994605	0.45999924144586	Serpine1/Gpx1	2
WT<CST	MF	GO:0001077	proximal promoter DNA-binding transcription activator activity, RNA polymerase II-specific	5/130	229/13889	0.0640284558209296	0.412183184347235	0.376307591228271	Creb3l1/Mitf/Klf1/Irf4/Hmga1	5
WT<CST	BP	GO:0002443	leukocyte mediated immunity	5/131	229/13966	0.0645046220903436	0.489968888994605	0.45999924144586	Crlf2/H60b/Chga/H2-D1/H2-T23	5
CST<WT	BP	GO:1901214	regulation of neuron death	6/127	311/13966	0.0645266420987072	0.315944473202816	0.269482253694216	Nos1ap/Cd34/Chl1/Grin2b/Prkcg/Faim2	6
WT<CST	BP	GO:0006986	response to unfolded protein	3/131	98/13966	0.0645558779479059	0.489968888994605	0.45999924144586	Bok/Creb3l1/Ccnd1	3
CST<WT	MF	GO:0070851	growth factor receptor binding	3/123	104/13889	0.0648611582090468	0.299035209924826	0.258025933545217	Grin2b/Fgf10/Vegfd	3
WT<CST	BP	GO:1905475	regulation of protein localization to membrane	4/131	161/13966	0.0649370062502155	0.489968888994605	0.45999924144586	Ptn/Ramp3/Myo1c/Stac2	4
WT<CST	BP	GO:2000027	regulation of animal organ morphogenesis	4/131	161/13966	0.0649370062502155	0.489968888994605	0.45999924144586	Bdnf/Ptn/Sp6/Plau	4
CST<WT	CC	GO:0098686	hippocampal mossy fiber to CA3 synapse	2/129	46/14212	0.0653153987936377	0.249302437648955	0.196575625724366	Grin2b/Syt1	2
WT<CST	BP	GO:0050900	leukocyte migration	5/131	230/13966	0.0654647702062762	0.489968888994605	0.45999924144586	Scg2/Ecm1/Serpine1/Itga9/Chga	5
CST<WT	BP	GO:0045840	positive regulation of mitotic nuclear division	2/127	46/13966	0.0655206896204512	0.319512836630905	0.272525860087622	Met/Igf1r	2
CST<WT	BP	GO:1990928	response to amino acid starvation	2/127	46/13966	0.0655206896204512	0.319512836630905	0.272525860087622	Rnf152/Mapk1	2
CST<WT	BP	GO:0032675	regulation of interleukin-6 production	3/127	102/13966	0.0659590963914565	0.321000935771755	0.273795122075753	Fcer1g/Met/Vegfd	3
WT<CST	BP	GO:0015893	drug transport	4/131	162/13966	0.0661187347860082	0.489968888994605	0.45999924144586	Syt2/Slc7a10/Nfkbie/Syt12	4
CST<WT	BP	GO:0030100	regulation of endocytosis	5/127	238/13966	0.0661502422555743	0.321282124180803	0.274034959428864	Fcer1g/Prkcg/Gsg1l/Syt4/Ubqln2	5
WT<CST	MF	GO:0031491	nucleosome binding	2/130	45/13889	0.0663027094300551	0.413634927464313	0.377632977552157	Hist1h1e/Hist1h1c	2
WT<CST	BP	GO:0001662	behavioral fear response	2/131	45/13966	0.0665517245003202	0.489968888994605	0.45999924144586	Bdnf/Adcyap1	2
WT<CST	BP	GO:0002209	behavioral defense response	2/131	45/13966	0.0665517245003202	0.489968888994605	0.45999924144586	Bdnf/Adcyap1	2
WT<CST	BP	GO:0032964	collagen biosynthetic process	2/131	45/13966	0.0665517245003202	0.489968888994605	0.45999924144586	Creb3l1/Serpine1	2
WT<CST	BP	GO:0046676	negative regulation of insulin secretion	2/131	45/13966	0.0665517245003202	0.489968888994605	0.45999924144586	Pde4c/Chga	2
WT<CST	BP	GO:0048002	antigen processing and presentation of peptide antigen	2/131	45/13966	0.0665517245003202	0.489968888994605	0.45999924144586	H2-D1/H2-T23	2
WT<CST	BP	GO:0051568	histone H3-K4 methylation	2/131	45/13966	0.0665517245003202	0.489968888994605	0.45999924144586	Hist1h1e/Hist1h1c	2
CST<WT	BP	GO:0030900	forebrain development	6/127	314/13966	0.0669359146982131	0.324443900418502	0.276731770604494	Rapgef2/Epha5/Cntnap2/Dync2h1/Fgf10/Gnaq	6
CST<WT	CC	GO:0120111	neuron projection cytoplasm	2/129	47/14212	0.0678247058310274	0.2550663498681	0.20112048562138	Grik3/Mapk1	2
CST<WT	BP	GO:0031103	axon regeneration	2/127	47/13966	0.0680372626012005	0.327803531212584	0.279597340205354	Igf1r/Ntrk3	2
CST<WT	BP	GO:0060711	labyrinthine layer development	2/127	47/13966	0.0680372626012005	0.327803531212584	0.279597340205354	Ncoa6/Mapk1	2
CST<WT	BP	GO:2000649	regulation of sodium ion transmembrane transporter activity	2/127	47/13966	0.0680372626012005	0.327803531212584	0.279597340205354	Scn3b/Ank3	2
CST<WT	CC	GO:0045121	membrane raft	6/129	317/14212	0.0689532744068339	0.2550663498681	0.20112048562138	Nos1ap/Fcer1g/Igf1r/Faim2/Mapk1/Gnaq	6
WT<CST	CC	GO:0098552	side of membrane	7/134	381/14212	0.0690202682117864	0.55792794842247	0.531359950878543	Ermap/Crlf2/Nptx2/Ank1/Stac2/H2-D1/Csf2ra	7
CST<WT	BP	GO:0048814	regulation of dendrite morphogenesis	3/127	104/13966	0.0690665668037068	0.332098521816626	0.283260717303993	Adgrb3/Rapgef2/Met	3
WT<CST	BP	GO:0015872	dopamine transport	2/131	46/13966	0.0691620189816951	0.489968888994605	0.45999924144586	Syt2/Syt12	2
WT<CST	BP	GO:0061045	negative regulation of wound healing	2/131	46/13966	0.0691620189816951	0.489968888994605	0.45999924144586	Serpine1/Plau	2
WT<CST	BP	GO:0002705	positive regulation of leukocyte mediated immunity	3/131	101/13966	0.0693456732290892	0.489968888994605	0.45999924144586	H60b/H2-D1/H2-T23	3
WT<CST	BP	GO:0051928	positive regulation of calcium ion transport	3/131	101/13966	0.0693456732290892	0.489968888994605	0.45999924144586	Serpine1/Ramp3/Stac2	3
CST<WT	BP	GO:0051347	positive regulation of transferase activity	8/127	477/13966	0.06945094921913	0.332805676607801	0.283863879197932	Atp2b4/Pak7/Rapgef2/Met/Ntrk3/Grm5/Fgf10/Mapk1	8
CST<WT	BP	GO:0050920	regulation of chemotaxis	4/127	170/13966	0.0694899357964815	0.332805676607801	0.283863879197932	Met/Ntrk3/Fgf10/Vegfd	4
CST<WT	CC	GO:0098857	membrane microdomain	6/129	318/14212	0.0697806946443414	0.2550663498681	0.20112048562138	Nos1ap/Fcer1g/Igf1r/Faim2/Mapk1/Gnaq	6
WT<CST	BP	GO:0050804	modulation of chemical synaptic transmission	8/131	463/13966	0.0699171478942316	0.489968888994605	0.45999924144586	Syt2/Bdnf/Vgf/Nptx2/Tmem108/Sphk1/Adcyap1/Syt12	8
CST<WT	BP	GO:0032623	interleukin-2 production	2/127	48/13966	0.0705854522227273	0.335007185694067	0.28574163836264	Fcer1g/Cd34	2
CST<WT	BP	GO:0048286	lung alveolus development	2/127	48/13966	0.0705854522227273	0.335007185694067	0.28574163836264	Foxp2/Fgf10	2
CST<WT	BP	GO:0060443	mammary gland morphogenesis	2/127	48/13966	0.0705854522227273	0.335007185694067	0.28574163836264	Fgf10/Ar	2
CST<WT	BP	GO:0098900	regulation of action potential	2/127	48/13966	0.0705854522227273	0.335007185694067	0.28574163836264	Ank3/Ryr2	2
CST<WT	CC	GO:0099568	cytoplasmic region	7/129	398/14212	0.0705903182291789	0.2550663498681	0.20112048562138	Grik3/Pclo/Rhou/Dync2h1/Arhgap32/Wipf2/Mapk1	7
WT<CST	BP	GO:0099177	regulation of trans-synaptic signaling	8/131	464/13966	0.0706065026405052	0.489968888994605	0.45999924144586	Syt2/Bdnf/Vgf/Nptx2/Tmem108/Sphk1/Adcyap1/Syt12	8
WT<CST	CC	GO:0005769	early endosome	5/134	234/14212	0.0706352119297948	0.55792794842247	0.531359950878543	Bok/Rap1gap/Tmem108/Lipg/Nox1	5
CST<WT	BP	GO:0032635	interleukin-6 production	3/127	105/13966	0.0706449357960091	0.335007185694067	0.28574163836264	Fcer1g/Met/Vegfd	3
CST<WT	BP	GO:0030003	cellular cation homeostasis	8/127	479/13966	0.0707859356102951	0.335016343585856	0.285749449511521	Atp2b4/Grin2b/Npy1r/Slc24a4/Ryr2/Slc4a8/Mapk1/Agtr2	8
CST<WT	MF	GO:0008194	UDP-glycosyltransferase activity	3/123	108/13889	0.0709274529218677	0.322810843426449	0.27854100945025	B3galt1/Ndst3/Mgat4c	3
WT<CST	BP	GO:0050728	negative regulation of inflammatory response	3/131	102/13966	0.0709772686027648	0.489968888994605	0.45999924144586	Gpx1/Serpinf1/Adcyap1	3
WT<CST	BP	GO:0007585	respiratory gaseous exchange	2/131	47/13966	0.0718055922174255	0.489968888994605	0.45999924144586	Ecel1/Apln	2
WT<CST	BP	GO:0032637	interleukin-8 production	2/131	47/13966	0.0718055922174255	0.489968888994605	0.45999924144586	Serpine1/Anxa4	2
WT<CST	BP	GO:0055081	anion homeostasis	2/131	47/13966	0.0718055922174255	0.489968888994605	0.45999924144586	Slc12a4/Lipg	2
CST<WT	BP	GO:0050773	regulation of dendrite development	4/127	172/13966	0.0718733498750123	0.339495882056676	0.289570235203352	Adgrb3/Rapgef2/Met/Sez6	4
WT<CST	MF	GO:0004857	enzyme inhibitor activity	5/130	237/13889	0.0718846912837835	0.413634927464313	0.377632977552157	Ppp1r26/Serpine1/Serpinf1/Papln/Serpina3n	5
WT<CST	CC	GO:0044449	contractile fiber part	4/134	166/14212	0.0720453661551966	0.55792794842247	0.531359950878543	Igfn1/Ank1/Pdlim3/Myl4	4
WT<CST	BP	GO:0002449	lymphocyte mediated immunity	4/131	167/13966	0.0721949778453393	0.489968888994605	0.45999924144586	Crlf2/H60b/H2-D1/H2-T23	4
WT<CST	BP	GO:0051216	cartilage development	4/131	167/13966	0.0721949778453393	0.489968888994605	0.45999924144586	Ecm1/Col27a1/Vwa1/Col11a2	4
CST<WT	BP	GO:0006282	regulation of DNA repair	3/127	106/13966	0.0722395585231565	0.340557918752024	0.290476090714186	Prkcg/Rnf169/Fgf10	3
WT<CST	CC	GO:0016459	myosin complex	2/134	47/14212	0.0724581751198013	0.55792794842247	0.531359950878543	Myo1c/Myl4	2
WT<CST	BP	GO:1901214	regulation of neuron death	6/131	311/13966	0.0726288810584629	0.489968888994605	0.45999924144586	Bok/Bdnf/Kcnip3/Gpx1/Serpinf1/Chga	6
CST<WT	BP	GO:0022604	regulation of cell morphogenesis	8/127	482/13966	0.0728179239677052	0.341576059527618	0.291344505559376	Adgrb3/Rapgef2/Met/Ntrk3/Rhou/Syt1/Dpysl2/Syt4	8
CST<WT	BP	GO:0030073	insulin secretion	4/127	173/13966	0.0730806513894985	0.341576059527618	0.291344505559376	Cacna1e/Pclo/Epha5/Gpr68	4
CST<WT	BP	GO:0030324	lung development	4/127	173/13966	0.0730806513894985	0.341576059527618	0.291344505559376	Foxp2/Sox11/Fgf10/Mapk1	4
CST<WT	BP	GO:0035265	organ growth	4/127	173/13966	0.0730806513894985	0.341576059527618	0.291344505559376	Fgf10/Matn2/Agtr2/Ar	4
CST<WT	BP	GO:0001708	cell fate specification	2/127	49/13966	0.0731644859760277	0.341576059527618	0.291344505559376	Ntrk3/Ar	2
WT<CST	MF	GO:0042277	peptide binding	5/130	239/13889	0.0739282827327796	0.413634927464313	0.377632977552157	Hcrtr1/Hcrtr2/Crhbp/H2-D1/H2-T23	5
CST<WT	MF	GO:0002020	protease binding	3/123	110/13889	0.0740534249852153	0.332771719870271	0.287135865032614	Nos1ap/Cntnap2/Chl1	3
CST<WT	BP	GO:0090066	regulation of anatomical structure size	8/127	484/13966	0.0741922739602306	0.345530134396251	0.29471710137051	Ntrk3/Npy1r/Wasf1/Wipf2/Chrm3/Htr1a/Dpysl2/Agtr2	8
WT<CST	BP	GO:0050777	negative regulation of immune response	3/131	104/13966	0.0742921180331492	0.489968888994605	0.45999924144586	Gpx1/H2-T23/Adcyap1	3
CST<WT	BP	GO:1902905	positive regulation of supramolecular fiber organization	4/127	174/13966	0.074298302041203	0.345530134396251	0.29471710137051	Met/Wasf1/Wipf2/Htr1a	4
WT<CST	BP	GO:0052548	regulation of endopeptidase activity	5/131	240/13966	0.0755063444325179	0.489968888994605	0.45999924144586	Bok/Serpine1/Gpx1/Serpinf1/Serpina3n	5
CST<WT	BP	GO:0045428	regulation of nitric oxide biosynthetic process	2/127	50/13966	0.0757736025881305	0.350362012734753	0.298838412470009	Atp2b4/Cd34	2
CST<WT	BP	GO:1900449	regulation of glutamate receptor signaling pathway	2/127	50/13966	0.0757736025881305	0.350362012734753	0.298838412470009	Shisa7/Gsg1l	2
CST<WT	BP	GO:1901016	regulation of potassium ion transmembrane transporter activity	2/127	50/13966	0.0757736025881305	0.350362012734753	0.298838412470009	Ank3/Fhl1	2
WT<CST	BP	GO:0003158	endothelium development	3/131	105/13966	0.0759750864927007	0.489968888994605	0.45999924144586	Gpx1/Tmem100/Tnmd	3
CST<WT	BP	GO:0030323	respiratory tube development	4/127	176/13966	0.0767645032717008	0.354170870737735	0.302087146743597	Foxp2/Sox11/Fgf10/Mapk1	4
WT<CST	CC	GO:0030018	Z disc	3/134	105/14212	0.0769114796166465	0.564876436029751	0.537977558123572	Igfn1/Ank1/Pdlim3	3
CST<WT	BP	GO:0010469	regulation of signaling receptor activity	3/127	109/13966	0.0771196536488426	0.354170870737735	0.302087146743597	Chrna4/Shisa7/Gsg1l	3
CST<WT	BP	GO:1902806	regulation of cell cycle G1/S phase transition	3/127	109/13966	0.0771196536488426	0.354170870737735	0.302087146743597	Atp2b4/Fgf10/Fhl1	3
WT<CST	BP	GO:0010823	negative regulation of mitochondrion organization	2/131	49/13966	0.0771892164989253	0.489968888994605	0.45999924144586	Bok/Gpx1	2
WT<CST	BP	GO:0042596	fear response	2/131	49/13966	0.0771892164989253	0.489968888994605	0.45999924144586	Bdnf/Adcyap1	2
WT<CST	BP	GO:1905268	negative regulation of chromatin organization	2/131	49/13966	0.0771892164989253	0.489968888994605	0.45999924144586	Hist1h1e/Hist1h1c	2
CST<WT	BP	GO:0033674	positive regulation of kinase activity	7/127	406/13966	0.0771932398403196	0.354170870737735	0.302087146743597	Atp2b4/Pak7/Rapgef2/Met/Ntrk3/Grm5/Fgf10	7
CST<WT	MF	GO:0016247	channel regulator activity	3/123	112/13889	0.077240011250906	0.342752549925895	0.295747937815969	Atp2b4/Cacnb2/Scn3b	3
CST<WT	CC	GO:0098589	membrane region	6/129	327/14212	0.077487041093321	0.273910748370994	0.215979343248444	Nos1ap/Fcer1g/Igf1r/Faim2/Mapk1/Gnaq	6
WT<CST	BP	GO:0006820	anion transport	7/131	394/13966	0.0775774802037139	0.489968888994605	0.45999924144586	Bdnf/Slc7a10/Slc5a5/Slc12a4/Slc38a3/Pitpnc1/Nfkbie	7
WT<CST	BP	GO:0031497	chromatin assembly	3/131	106/13966	0.0776748907313007	0.489968888994605	0.45999924144586	Hist1h4k/Hist1h1e/Hist1h1c	3
CST<WT	BP	GO:0006873	cellular ion homeostasis	8/127	489/13966	0.0776971342062951	0.354170870737735	0.302087146743597	Atp2b4/Grin2b/Npy1r/Slc24a4/Ryr2/Slc4a8/Mapk1/Agtr2	8
CST<WT	BP	GO:0043405	regulation of MAP kinase activity	5/127	250/13966	0.0779722770779153	0.354170870737735	0.302087146743597	Met/Igf1r/Ntrk3/Grm5/Fgf10	5
CST<WT	BP	GO:0048608	reproductive structure development	6/127	327/13966	0.0779789518889677	0.354170870737735	0.302087146743597	Ncoa6/Met/Igf1r/Fgf10/Mapk1/Ar	6
CST<WT	BP	GO:0061138	morphogenesis of a branching epithelium	4/127	177/13966	0.0780129776810815	0.354170870737735	0.302087146743597	Met/Fgf10/Agtr2/Ar	4
CST<WT	BP	GO:1903531	negative regulation of secretion by cell	4/127	177/13966	0.0780129776810815	0.354170870737735	0.302087146743597	Cd34/Npy1r/Syt4/Agtr2	4
CST<WT	BP	GO:0034394	protein localization to cell surface	2/127	51/13966	0.0784120518843093	0.354170870737735	0.302087146743597	Fcer1g/Fgf10	2
CST<WT	BP	GO:0098661	inorganic anion transmembrane transport	2/127	51/13966	0.0784120518843093	0.354170870737735	0.302087146743597	Grm5/Glra3	2
CST<WT	BP	GO:0018105	peptidyl-serine phosphorylation	5/127	251/13966	0.0790059158145202	0.354170870737735	0.302087146743597	Atp2b4/Met/Prkcg/Ntrk3/Mapk1	5
WT<CST	BP	GO:0006665	sphingolipid metabolic process	3/131	107/13966	0.0793913835796137	0.489968888994605	0.45999924144586	Serinc2/Sphk1/Gla	3
WT<CST	MF	GO:0042165	neurotransmitter binding	2/130	50/13889	0.0796336853297855	0.413634927464313	0.377632977552157	Ache/Crhbp	2
WT<CST	BP	GO:0030073	insulin secretion	4/131	173/13966	0.0798502428817004	0.489968888994605	0.45999924144586	Vgf/Pde4c/Chga/Adcyap1	4
WT<CST	BP	GO:0007528	neuromuscular junction development	2/131	50/13966	0.0799276198205768	0.489968888994605	0.45999924144586	Ptn/Colq	2
WT<CST	BP	GO:0045428	regulation of nitric oxide biosynthetic process	2/131	50/13966	0.0799276198205768	0.489968888994605	0.45999924144586	Ddah1/Gla	2
CST<WT	BP	GO:0018108	peptidyl-tyrosine phosphorylation	5/127	252/13966	0.0800469501405454	0.354170870737735	0.302087146743597	Igf1r/Grm5/Dyrk2/Fgf10/Sla	5
WT<CST	CC	GO:0045178	basal part of cell	2/134	50/14212	0.0806463714615678	0.564876436029751	0.537977558123572	Itga9/Myo1c	2
CST<WT	BP	GO:0007517	muscle organ development	6/127	330/13966	0.0806659972391216	0.354170870737735	0.302087146743597	Foxp2/Met/Hlf/Sox11/Etv1/Ryr2	6
CST<WT	BP	GO:0061458	reproductive system development	6/127	330/13966	0.0806659972391216	0.354170870737735	0.302087146743597	Ncoa6/Met/Igf1r/Fgf10/Mapk1/Ar	6
WT<CST	BP	GO:0044057	regulation of system process	8/131	478/13966	0.0806973259874463	0.489968888994605	0.45999924144586	Nptx2/Tmem108/Tmem100/Myl4/Sphk1/Chga/Crhbp/Apln	8
WT<CST	CC	GO:0030016	myofibril	4/134	173/14212	0.0810533630278776	0.564876436029751	0.537977558123572	Igfn1/Ank1/Pdlim3/Myl4	4
CST<WT	BP	GO:0030193	regulation of blood coagulation	2/127	52/13966	0.0810790946518399	0.354170870737735	0.302087146743597	Fcer1g/Cd34	2
CST<WT	BP	GO:0043299	leukocyte degranulation	2/127	52/13966	0.0810790946518399	0.354170870737735	0.302087146743597	Fcer1g/Pla2g3	2
CST<WT	BP	GO:0045576	mast cell activation	2/127	52/13966	0.0810790946518399	0.354170870737735	0.302087146743597	Fcer1g/Pla2g3	2
CST<WT	BP	GO:1900046	regulation of hemostasis	2/127	52/13966	0.0810790946518399	0.354170870737735	0.302087146743597	Fcer1g/Cd34	2
WT<CST	BP	GO:0051963	regulation of synapse assembly	3/131	108/13966	0.0811244162474828	0.489968888994605	0.45999924144586	Bdnf/Colq/Srpx2	3
WT<CST	BP	GO:0030003	cellular cation homeostasis	8/131	479/13966	0.0814495499796343	0.489968888994605	0.45999924144586	Bok/Hcrtr1/Hcrtr2/Ramp3/Chga/Atp6v0c/Adcyap1/Nox1	8
CST<WT	BP	GO:0050806	positive regulation of synaptic transmission	4/127	180/13966	0.0818194191636846	0.354170870737735	0.302087146743597	Grin2b/Shisa7/Syt1/Mapk1	4
CST<WT	BP	GO:0033135	regulation of peptidyl-serine phosphorylation	3/127	112/13966	0.0821413030834818	0.354170870737735	0.302087146743597	Atp2b4/Met/Ntrk3	3
CST<WT	BP	GO:0043010	camera-type eye development	5/127	254/13966	0.0821511444486782	0.354170870737735	0.302087146743597	Pds5b/Foxp2/Ntrk3/Sox11/Fgf10	5
WT<CST	MF	GO:0004896	cytokine receptor activity	2/130	51/13889	0.0823929461815672	0.413634927464313	0.377632977552157	Crlf2/Csf2ra	2
WT<CST	MF	GO:0030276	clathrin binding	2/130	51/13889	0.0823929461815672	0.413634927464313	0.377632977552157	Syt2/Syt12	2
WT<CST	BP	GO:0007269	neurotransmitter secretion	4/131	175/13966	0.0824887496946426	0.489968888994605	0.45999924144586	Syt2/Cadps2/Sphk1/Syt12	4
WT<CST	BP	GO:0099643	signal release from synapse	4/131	175/13966	0.0824887496946426	0.489968888994605	0.45999924144586	Syt2/Cadps2/Sphk1/Syt12	4
WT<CST	BP	GO:0002709	regulation of T cell mediated immunity	2/131	51/13966	0.0826960061293632	0.489968888994605	0.45999924144586	H2-D1/H2-T23	2
WT<CST	BP	GO:0048260	positive regulation of receptor-mediated endocytosis	2/131	51/13966	0.0826960061293632	0.489968888994605	0.45999924144586	Serpine1/Apln	2
WT<CST	BP	GO:0050830	defense response to Gram-positive bacterium	2/131	51/13966	0.0826960061293632	0.489968888994605	0.45999924144586	Chga/H2-T23	2
CST<WT	CC	GO:0030659	cytoplasmic vesicle membrane	5/129	255/14212	0.0827467309259527	0.273910748370994	0.215979343248444	Moxd1/Syt1/Nsg2/Ryr2/Syt4	5
WT<CST	BP	GO:0030856	regulation of epithelial cell differentiation	3/131	109/13966	0.0828738383925982	0.489968888994605	0.45999924144586	Serpine1/Ccnd1/Tmem100	3
WT<CST	BP	GO:0050709	negative regulation of protein secretion	3/131	109/13966	0.0828738383925982	0.489968888994605	0.45999924144586	Anxa4/Pde4c/Chga	3
CST<WT	BP	GO:0018212	peptidyl-tyrosine modification	5/127	255/13966	0.0832142725578395	0.354170870737735	0.302087146743597	Igf1r/Grm5/Dyrk2/Fgf10/Sla	5
CST<WT	BP	GO:0043462	regulation of ATPase activity	2/127	53/13966	0.0837740025052885	0.354170870737735	0.302087146743597	Ryr2/Fgf10	2
CST<WT	BP	GO:1903036	positive regulation of response to wounding	2/127	53/13966	0.0837740025052885	0.354170870737735	0.302087146743597	Igf1r/Ntrk3	2
CST<WT	BP	GO:0031623	receptor internalization	3/127	113/13966	0.0838460100410355	0.354170870737735	0.302087146743597	Fcer1g/Gsg1l/Ubqln2	3
CST<WT	BP	GO:0032273	positive regulation of protein polymerization	3/127	113/13966	0.0838460100410355	0.354170870737735	0.302087146743597	Met/Wasf1/Wipf2	3
CST<WT	BP	GO:0051592	response to calcium ion	3/127	113/13966	0.0838460100410355	0.354170870737735	0.302087146743597	Syt1/Ryr2/Syt4	3
CST<WT	BP	GO:0055067	monovalent inorganic cation homeostasis	3/127	113/13966	0.0838460100410355	0.354170870737735	0.302087146743597	Slc4a8/Mapk1/Agtr2	3
CST<WT	BP	GO:0099175	regulation of postsynapse organization	3/127	113/13966	0.0838460100410355	0.354170870737735	0.302087146743597	Grin2b/Shisa7/Ntrk3	3
CST<WT	CC	GO:0043197	dendritic spine	4/129	182/14212	0.0839944489355833	0.273910748370994	0.215979343248444	Grin2b/Shisa7/Grm5/Sez6	4
CST<WT	BP	GO:0034764	positive regulation of transmembrane transport	4/127	182/13966	0.0844074794873493	0.354170870737735	0.302087146743597	Cacnb2/Met/Ank3/Ryr2	4
WT<CST	BP	GO:0072657	protein localization to membrane	8/131	483/13966	0.0845003779425607	0.489968888994605	0.45999924144586	Kcnip3/Nptx2/Ptn/Ank1/Ramp3/Myo1c/Stac2/Colq	8
WT<CST	BP	GO:0002706	regulation of lymphocyte mediated immunity	3/131	110/13966	0.0846394981878107	0.489968888994605	0.45999924144586	H60b/H2-D1/H2-T23	3
CST<WT	MF	GO:0005149	interleukin-1 receptor binding	1/123	10/13889	0.0851386197701709	0.351444302539659	0.303247715460462	Grin2b	1
CST<WT	MF	GO:0010857	calcium-dependent protein kinase activity	1/123	10/13889	0.0851386197701709	0.351444302539659	0.303247715460462	Prkcg	1
CST<WT	MF	GO:0019865	immunoglobulin binding	1/123	10/13889	0.0851386197701709	0.351444302539659	0.303247715460462	Fcer1g	1
CST<WT	MF	GO:0043121	neurotrophin binding	1/123	10/13889	0.0851386197701709	0.351444302539659	0.303247715460462	Ntrk3	1
CST<WT	MF	GO:0043560	insulin receptor substrate binding	1/123	10/13889	0.0851386197701709	0.351444302539659	0.303247715460462	Igf1r	1
CST<WT	MF	GO:0051378	serotonin binding	1/123	10/13889	0.0851386197701709	0.351444302539659	0.303247715460462	Htr1a	1
WT<CST	BP	GO:0060047	heart contraction	4/131	177/13966	0.0851700267235968	0.489968888994605	0.45999924144586	Gpx1/Myl4/Chga/Apln	4
WT<CST	BP	GO:1903531	negative regulation of secretion by cell	4/131	177/13966	0.0851700267235968	0.489968888994605	0.45999924144586	Anxa4/Pde4c/Chga/Crhbp	4
WT<CST	BP	GO:0090066	regulation of anatomical structure size	8/131	484/13966	0.0852735634709811	0.489968888994605	0.45999924144586	Bdnf/Vasp/Slc12a4/Gpx1/Myo1c/Chga/Adcyap1/Apln	8
WT<CST	BP	GO:0001541	ovarian follicle development	2/131	52/13966	0.0854935823511373	0.489968888994605	0.45999924144586	Vgf/Adcyap1	2
WT<CST	BP	GO:0030193	regulation of blood coagulation	2/131	52/13966	0.0854935823511373	0.489968888994605	0.45999924144586	Serpine1/Plau	2
WT<CST	BP	GO:0045576	mast cell activation	2/131	52/13966	0.0854935823511373	0.489968888994605	0.45999924144586	Crlf2/Chga	2
WT<CST	BP	GO:1900046	regulation of hemostasis	2/131	52/13966	0.0854935823511373	0.489968888994605	0.45999924144586	Serpine1/Plau	2
CST<WT	BP	GO:0048639	positive regulation of developmental growth	4/127	183/13966	0.0857165099809279	0.354170870737735	0.302087146743597	Celf1/Ntrk3/Syt1/Syt4	4
WT<CST	BP	GO:0030099	myeloid cell differentiation	6/131	326/13966	0.0864941080097174	0.489968888994605	0.45999924144586	Rhd/Mitf/Ank1/Klf1/Hist1h4k/Irf4	6
CST<WT	BP	GO:0007193	adenylate cyclase-inhibiting G protein-coupled receptor signaling pathway	2/127	54/13966	0.0864960577533098	0.354170870737735	0.302087146743597	Chrm3/Htr1a	2
CST<WT	BP	GO:0043406	positive regulation of MAP kinase activity	4/127	184/13966	0.087035481115755	0.354170870737735	0.302087146743597	Met/Ntrk3/Grm5/Fgf10	4
CST<WT	CC	GO:0000137	Golgi cis cisterna	1/129	10/14212	0.0871756786503273	0.273910748370994	0.215979343248444	Nsg2	1
CST<WT	CC	GO:0001527	microfibril	1/129	10/14212	0.0871756786503273	0.273910748370994	0.215979343248444	Mfap1b	1
CST<WT	CC	GO:0002178	palmitoyltransferase complex	1/129	10/14212	0.0871756786503273	0.273910748370994	0.215979343248444	Zdhhc9	1
CST<WT	CC	GO:0005892	acetylcholine-gated channel complex	1/129	10/14212	0.0871756786503273	0.273910748370994	0.215979343248444	Chrna4	1
CST<WT	CC	GO:0036513	Derlin-1 retrotranslocation complex	1/129	10/14212	0.0871756786503273	0.273910748370994	0.215979343248444	Sel1l	1
CST<WT	CC	GO:0044224	juxtaparanode region of axon	1/129	10/14212	0.0871756786503273	0.273910748370994	0.215979343248444	Cntnap2	1
CST<WT	CC	GO:0099569	presynaptic cytoskeleton	1/129	10/14212	0.0871756786503273	0.273910748370994	0.215979343248444	Pclo	1
CST<WT	BP	GO:0007596	blood coagulation	3/127	115/13966	0.0873008281632856	0.354170870737735	0.302087146743597	Fcer1g/Cd34/Lyst	3
CST<WT	BP	GO:0001991	regulation of systemic arterial blood pressure by circulatory renin-angiotensin	1/127	10/13966	0.087329803743551	0.354170870737735	0.302087146743597	Agtr2	1
CST<WT	BP	GO:0002091	negative regulation of receptor internalization	1/127	10/13966	0.087329803743551	0.354170870737735	0.302087146743597	Ubqln2	1
CST<WT	BP	GO:0002283	neutrophil activation involved in immune response	1/127	10/13966	0.087329803743551	0.354170870737735	0.302087146743597	Fcer1g	1
CST<WT	BP	GO:0002551	mast cell chemotaxis	1/127	10/13966	0.087329803743551	0.354170870737735	0.302087146743597	Vegfd	1
CST<WT	BP	GO:0007635	chemosensory behavior	1/127	10/13966	0.087329803743551	0.354170870737735	0.302087146743597	Prkcg	1
CST<WT	BP	GO:0010459	negative regulation of heart rate	1/127	10/13966	0.087329803743551	0.354170870737735	0.302087146743597	Agtr2	1
CST<WT	BP	GO:0019227	neuronal action potential propagation	1/127	10/13966	0.087329803743551	0.354170870737735	0.302087146743597	Ntrk3	1
CST<WT	BP	GO:0021534	cell proliferation in hindbrain	1/127	10/13966	0.087329803743551	0.354170870737735	0.302087146743597	Rere	1
CST<WT	BP	GO:0021702	cerebellar Purkinje cell differentiation	1/127	10/13966	0.087329803743551	0.354170870737735	0.302087146743597	Faim2	1
CST<WT	BP	GO:0021924	cell proliferation in external granule layer	1/127	10/13966	0.087329803743551	0.354170870737735	0.302087146743597	Rere	1
CST<WT	BP	GO:0021930	cerebellar granule cell precursor proliferation	1/127	10/13966	0.087329803743551	0.354170870737735	0.302087146743597	Rere	1
CST<WT	BP	GO:0032486	Rap protein signal transduction	1/127	10/13966	0.087329803743551	0.354170870737735	0.302087146743597	Rapgef2	1
CST<WT	BP	GO:0033148	positive regulation of intracellular estrogen receptor signaling pathway	1/127	10/13966	0.087329803743551	0.354170870737735	0.302087146743597	Ar	1
CST<WT	BP	GO:0033299	secretion of lysosomal enzymes	1/127	10/13966	0.087329803743551	0.354170870737735	0.302087146743597	Lyst	1
CST<WT	BP	GO:0033603	positive regulation of dopamine secretion	1/127	10/13966	0.087329803743551	0.354170870737735	0.302087146743597	Chrna4	1
CST<WT	BP	GO:0038093	Fc receptor signaling pathway	1/127	10/13966	0.087329803743551	0.354170870737735	0.302087146743597	Fcer1g	1
CST<WT	BP	GO:0043455	regulation of secondary metabolic process	1/127	10/13966	0.087329803743551	0.354170870737735	0.302087146743597	Rapgef2	1
CST<WT	BP	GO:0060013	righting reflex	1/127	10/13966	0.087329803743551	0.354170870737735	0.302087146743597	Foxp2	1
CST<WT	BP	GO:0060020	Bergmann glial cell differentiation	1/127	10/13966	0.087329803743551	0.354170870737735	0.302087146743597	Mapk1	1
CST<WT	BP	GO:0060742	epithelial cell differentiation involved in prostate gland development	1/127	10/13966	0.087329803743551	0.354170870737735	0.302087146743597	Ar	1
CST<WT	BP	GO:0061577	calcium ion transmembrane transport via high voltage-gated calcium channel	1/127	10/13966	0.087329803743551	0.354170870737735	0.302087146743597	Cacnb2	1
CST<WT	BP	GO:0070341	fat cell proliferation	1/127	10/13966	0.087329803743551	0.354170870737735	0.302087146743597	Fgf10	1
CST<WT	BP	GO:0070344	regulation of fat cell proliferation	1/127	10/13966	0.087329803743551	0.354170870737735	0.302087146743597	Fgf10	1
CST<WT	BP	GO:0071294	cellular response to zinc ion	1/127	10/13966	0.087329803743551	0.354170870737735	0.302087146743597	Glra3	1
CST<WT	BP	GO:0072224	metanephric glomerulus development	1/127	10/13966	0.087329803743551	0.354170870737735	0.302087146743597	Agtr2	1
CST<WT	BP	GO:0072584	caveolin-mediated endocytosis	1/127	10/13966	0.087329803743551	0.354170870737735	0.302087146743597	Mapk1	1
CST<WT	BP	GO:0075522	IRES-dependent viral translational initiation	1/127	10/13966	0.087329803743551	0.354170870737735	0.302087146743597	Pcbp2	1
CST<WT	BP	GO:0097011	cellular response to granulocyte macrophage colony-stimulating factor stimulus	1/127	10/13966	0.087329803743551	0.354170870737735	0.302087146743597	Mapk1	1
CST<WT	BP	GO:0097113	AMPA glutamate receptor clustering	1/127	10/13966	0.087329803743551	0.354170870737735	0.302087146743597	Shisa7	1
CST<WT	BP	GO:0098870	action potential propagation	1/127	10/13966	0.087329803743551	0.354170870737735	0.302087146743597	Ntrk3	1
CST<WT	BP	GO:0099541	trans-synaptic signaling by lipid	1/127	10/13966	0.087329803743551	0.354170870737735	0.302087146743597	Grm5	1
CST<WT	BP	GO:0099542	trans-synaptic signaling by endocannabinoid	1/127	10/13966	0.087329803743551	0.354170870737735	0.302087146743597	Grm5	1
CST<WT	BP	GO:0099558	maintenance of synapse structure	1/127	10/13966	0.087329803743551	0.354170870737735	0.302087146743597	Adgrb3	1
CST<WT	BP	GO:1900038	negative regulation of cellular response to hypoxia	1/127	10/13966	0.087329803743551	0.354170870737735	0.302087146743597	Cd34	1
CST<WT	BP	GO:1903817	negative regulation of voltage-gated potassium channel activity	1/127	10/13966	0.087329803743551	0.354170870737735	0.302087146743597	Ank3	1
CST<WT	BP	GO:1905097	regulation of guanyl-nucleotide exchange factor activity	1/127	10/13966	0.087329803743551	0.354170870737735	0.302087146743597	Met	1
CST<WT	BP	GO:1990504	dense core granule exocytosis	1/127	10/13966	0.087329803743551	0.354170870737735	0.302087146743597	Syt4	1
CST<WT	BP	GO:2000302	positive regulation of synaptic vesicle exocytosis	1/127	10/13966	0.087329803743551	0.354170870737735	0.302087146743597	Syt1	1
WT<CST	BP	GO:0032102	negative regulation of response to external stimulus	5/131	251/13966	0.0874654540598936	0.489968888994605	0.45999924144586	Serpine1/Gpx1/Serpinf1/Plau/Adcyap1	5
WT<CST	BP	GO:0048608	reproductive structure development	6/131	327/13966	0.0874672496915895	0.489968888994605	0.45999924144586	Col9a3/Vgf/Serpine1/Ccnd1/Serpinf1/Adcyap1	6
CST<WT	CC	GO:0150034	distal axon	6/129	338/14212	0.0875370130800627	0.273910748370994	0.215979343248444	Grik3/Pclo/Grin2b/Prkcg/Chrm3/Dpysl2	6
WT<CST	MF	GO:0070011	peptidase activity, acting on L-amino acid peptides	7/130	407/13889	0.0877397275443002	0.413634927464313	0.377632977552157	Ecel1/Pamr1/Pappa/Otud7a/Htra4/Adamts8/Plau	7
WT<CST	MF	GO:0016247	channel regulator activity	3/130	112/13889	0.0877843442578183	0.413634927464313	0.377632977552157	Pacsin3/Kcnip3/Lynx1	3
WT<CST	BP	GO:0015850	organic hydroxy compound transport	4/131	179/13966	0.0878936862452912	0.489968888994605	0.45999924144586	Syt2/Chga/Lipg/Syt12	4
CST<WT	CC	GO:0044309	neuron spine	4/129	185/14212	0.0879344468940092	0.273910748370994	0.215979343248444	Grin2b/Shisa7/Grm5/Sez6	4
CST<WT	MF	GO:0015297	antiporter activity	2/123	56/13889	0.0879772311335574	0.358987552326585	0.309756494372235	Slc24a4/Slc4a8	2
CST<WT	BP	GO:0071236	cellular response to antibiotic	3/127	116/13966	0.0890506578760923	0.358984080910765	0.306192534984079	Epha5/Met/Glra3	3
WT<CST	BP	GO:0006873	cellular ion homeostasis	8/131	489/13966	0.0892022943849219	0.489968888994605	0.45999924144586	Bok/Hcrtr1/Hcrtr2/Ramp3/Chga/Atp6v0c/Adcyap1/Nox1	8
CST<WT	BP	GO:0021879	forebrain neuron differentiation	2/127	55/13966	0.0892445532669445	0.358984080910765	0.306192534984079	Rapgef2/Gnaq	2
CST<WT	BP	GO:0033692	cellular polysaccharide biosynthetic process	2/127	55/13966	0.0892445532669445	0.358984080910765	0.306192534984079	Ndst3/Dyrk2	2
WT<CST	BP	GO:0050806	positive regulation of synaptic transmission	4/131	180/13966	0.0892712840350827	0.489968888994605	0.45999924144586	Syt2/Sphk1/Adcyap1/Syt12	4
WT<CST	CC	GO:0031674	I band	3/134	112/14212	0.0892844646028055	0.564876436029751	0.537977558123572	Igfn1/Ank1/Pdlim3	3
CST<WT	BP	GO:0032388	positive regulation of intracellular transport	4/127	186/13966	0.0897030614818335	0.358984080910765	0.306192534984079	Fcer1g/Ank3/Syt1/Mapk1	4
WT<CST	MF	GO:0004806	triglyceride lipase activity	1/130	10/13889	0.0897815664081058	0.413634927464313	0.377632977552157	Lipg	1
WT<CST	MF	GO:0015377	cation:chloride symporter activity	1/130	10/13889	0.0897815664081058	0.413634927464313	0.377632977552157	Slc12a4	1
WT<CST	BP	GO:0002363	alpha-beta T cell lineage commitment	1/131	10/13966	0.0899651969413987	0.489968888994605	0.45999924144586	Irf4	1
WT<CST	BP	GO:0002551	mast cell chemotaxis	1/131	10/13966	0.0899651969413987	0.489968888994605	0.45999924144586	Chga	1
WT<CST	BP	GO:0002674	negative regulation of acute inflammatory response	1/131	10/13966	0.0899651969413987	0.489968888994605	0.45999924144586	Adcyap1	1
WT<CST	BP	GO:0006531	aspartate metabolic process	1/131	10/13966	0.0899651969413987	0.489968888994605	0.45999924144586	Adssl1	1
WT<CST	BP	GO:0006658	phosphatidylserine metabolic process	1/131	10/13966	0.0899651969413987	0.489968888994605	0.45999924144586	Serinc2	1
WT<CST	BP	GO:0009071	serine family amino acid catabolic process	1/131	10/13966	0.0899651969413987	0.489968888994605	0.45999924144586	Amt	1
WT<CST	BP	GO:0009650	UV protection	1/131	10/13966	0.0899651969413987	0.489968888994605	0.45999924144586	Gpx1	1
WT<CST	BP	GO:0031652	positive regulation of heat generation	1/131	10/13966	0.0899651969413987	0.489968888994605	0.45999924144586	Apln	1
WT<CST	BP	GO:0032530	regulation of microvillus organization	1/131	10/13966	0.0899651969413987	0.489968888994605	0.45999924144586	Rap1gap	1
WT<CST	BP	GO:0034375	high-density lipoprotein particle remodeling	1/131	10/13966	0.0899651969413987	0.489968888994605	0.45999924144586	Lipg	1
WT<CST	BP	GO:0035743	CD4-positive, alpha-beta T cell cytokine production	1/131	10/13966	0.0899651969413987	0.489968888994605	0.45999924144586	Crlf2	1
WT<CST	BP	GO:0042756	drinking behavior	1/131	10/13966	0.0899651969413987	0.489968888994605	0.45999924144586	Apln	1
WT<CST	BP	GO:0043650	dicarboxylic acid biosynthetic process	1/131	10/13966	0.0899651969413987	0.489968888994605	0.45999924144586	Mthfd1l	1
WT<CST	BP	GO:0046040	IMP metabolic process	1/131	10/13966	0.0899651969413987	0.489968888994605	0.45999924144586	Adssl1	1
WT<CST	BP	GO:0048149	behavioral response to ethanol	1/131	10/13966	0.0899651969413987	0.489968888994605	0.45999924144586	Crhbp	1
WT<CST	BP	GO:0048245	eosinophil chemotaxis	1/131	10/13966	0.0899651969413987	0.489968888994605	0.45999924144586	Scg2	1
WT<CST	BP	GO:0060452	positive regulation of cardiac muscle contraction	1/131	10/13966	0.0899651969413987	0.489968888994605	0.45999924144586	Chga	1
WT<CST	BP	GO:0090026	positive regulation of monocyte chemotaxis	1/131	10/13966	0.0899651969413987	0.489968888994605	0.45999924144586	Serpine1	1
WT<CST	BP	GO:0097011	cellular response to granulocyte macrophage colony-stimulating factor stimulus	1/131	10/13966	0.0899651969413987	0.489968888994605	0.45999924144586	Csf2ra	1
WT<CST	BP	GO:1900038	negative regulation of cellular response to hypoxia	1/131	10/13966	0.0899651969413987	0.489968888994605	0.45999924144586	Ddah1	1
WT<CST	BP	GO:1901030	positive regulation of mitochondrial outer membrane permeabilization involved in apoptotic signaling pathway	1/131	10/13966	0.0899651969413987	0.489968888994605	0.45999924144586	Bok	1
WT<CST	BP	GO:1990504	dense core granule exocytosis	1/131	10/13966	0.0899651969413987	0.489968888994605	0.45999924144586	Cadps2	1
WT<CST	BP	GO:2000302	positive regulation of synaptic vesicle exocytosis	1/131	10/13966	0.0899651969413987	0.489968888994605	0.45999924144586	Syt2	1
WT<CST	BP	GO:0031623	receptor internalization	3/131	113/13966	0.0900323643063466	0.489968888994605	0.45999924144586	Ache/Ramp3/Apln	3
WT<CST	BP	GO:0051592	response to calcium ion	3/131	113/13966	0.0900323643063466	0.489968888994605	0.45999924144586	Syt2/Crhbp/Syt12	3
WT<CST	BP	GO:0055067	monovalent inorganic cation homeostasis	3/131	113/13966	0.0900323643063466	0.489968888994605	0.45999924144586	Slc12a4/Atp6v0c/Nox1	3
CST<WT	BP	GO:0030855	epithelial cell differentiation	7/127	422/13966	0.0903077754201372	0.358984080910765	0.306192534984079	Cbfa2t2/Rapgef2/Met/Ntrk3/Sox11/Fgf10/Ar	7
WT<CST	CC	GO:0005583	fibrillar collagen trimer	1/134	10/14212	0.0904124115443063	0.564876436029751	0.537977558123572	Col27a1	1
WT<CST	CC	GO:0098643	banded collagen fibril	1/134	10/14212	0.0904124115443063	0.564876436029751	0.537977558123572	Col27a1	1
WT<CST	BP	GO:0061458	reproductive system development	6/131	330/13966	0.0904229577615779	0.489968888994605	0.45999924144586	Col9a3/Vgf/Serpine1/Ccnd1/Serpinf1/Adcyap1	6
CST<WT	BP	GO:0007599	hemostasis	3/127	117/13966	0.0908152451621815	0.358984080910765	0.306192534984079	Fcer1g/Cd34/Lyst	3
WT<CST	BP	GO:1903078	positive regulation of protein localization to plasma membrane	2/131	54/13966	0.0911731922565035	0.489968888994605	0.45999924144586	Ramp3/Stac2	2
WT<CST	BP	GO:0019233	sensory perception of pain	3/131	114/13966	0.0918614290155228	0.489968888994605	0.45999924144586	Kcnip3/Tmem100/Adcyap1	3
CST<WT	BP	GO:0032970	regulation of actin filament-based process	6/127	342/13966	0.0919293743668574	0.358984080910765	0.306192534984079	Epha5/Met/Ntrk3/Wasf1/Wipf2/Ryr2	6
CST<WT	BP	GO:0043949	regulation of cAMP-mediated signaling	2/127	56/13966	0.0920187923493962	0.358984080910765	0.306192534984079	Atp2b4/Rapgef2	2
CST<WT	BP	GO:0050818	regulation of coagulation	2/127	56/13966	0.0920187923493962	0.358984080910765	0.306192534984079	Fcer1g/Cd34	2
WT<CST	BP	GO:0071363	cellular response to growth factor stimulus	8/131	493/13966	0.0924205259629043	0.489968888994605	0.45999924144586	Creb3l1/Bdnf/Rap1gap/Serpine1/Tmem108/Myo1c/Tmem100/Apln	8
CST<WT	BP	GO:0050817	coagulation	3/127	118/13966	0.0925944465351791	0.358984080910765	0.306192534984079	Fcer1g/Cd34/Lyst	3
CST<WT	BP	GO:0051606	detection of stimulus	3/127	118/13966	0.0925944465351791	0.358984080910765	0.306192534984079	Grin2b/Syt1/Ryr2	3
CST<WT	BP	GO:0070997	neuron death	6/127	343/13966	0.0929049203353007	0.358984080910765	0.306192534984079	Nos1ap/Cd34/Chl1/Grin2b/Prkcg/Faim2	6
WT<CST	BP	GO:0002250	adaptive immune response	5/131	256/13966	0.0932118737460729	0.489968888994605	0.45999924144586	Crlf2/H60b/Irf4/H2-D1/H2-T23	5
CST<WT	MF	GO:0005388	calcium-transporting ATPase activity	1/123	11/13889	0.0932464048964964	0.362864827606015	0.313102045465828	Atp2b4	1
CST<WT	MF	GO:0031994	insulin-like growth factor I binding	1/123	11/13889	0.0932464048964964	0.362864827606015	0.313102045465828	Igf1r	1
CST<WT	MF	GO:0106019	phosphatidylinositol-4,5-bisphosphate phosphatase activity	1/123	11/13889	0.0932464048964964	0.362864827606015	0.313102045465828	Inpp4a	1
CST<WT	MF	GO:0016597	amino acid binding	2/123	58/13889	0.0933806163901934	0.362864827606015	0.313102045465828	Grin2b/Glra3	2
WT<CST	BP	GO:0030218	erythrocyte differentiation	3/131	115/13966	0.0937059522302182	0.489968888994605	0.45999924144586	Rhd/Ank1/Klf1	3
WT<CST	BP	GO:0001836	release of cytochrome c from mitochondria	2/131	55/13966	0.0940536993536964	0.489968888994605	0.45999924144586	Bok/Gpx1	2
WT<CST	BP	GO:0033627	cell adhesion mediated by integrin	2/131	55/13966	0.0940536993536964	0.489968888994605	0.45999924144586	Serpine1/Plau	2
WT<CST	BP	GO:0051453	regulation of intracellular pH	2/131	55/13966	0.0940536993536964	0.489968888994605	0.45999924144586	Atp6v0c/Nox1	2
WT<CST	BP	GO:0070059	intrinsic apoptotic signaling pathway in response to endoplasmic reticulum stress	2/131	55/13966	0.0940536993536964	0.489968888994605	0.45999924144586	Bok/Creb3l1	2
CST<WT	BP	GO:0043484	regulation of RNA splicing	3/127	119/13966	0.0943881174984182	0.358984080910765	0.306192534984079	Celf2/Celf1/Polr2a	3
CST<WT	BP	GO:0032870	cellular response to hormone stimulus	7/127	427/13966	0.0946506623806788	0.358984080910765	0.306192534984079	Chrna4/Cpeb2/Epha5/Igf1r/Chrm3/Agtr2/Ar	7
CST<WT	BP	GO:0000381	regulation of alternative mRNA splicing, via spliceosome	2/127	57/13966	0.0948180886072741	0.358984080910765	0.306192534984079	Celf2/Celf1	2
CST<WT	BP	GO:0006809	nitric oxide biosynthetic process	2/127	57/13966	0.0948180886072741	0.358984080910765	0.306192534984079	Atp2b4/Cd34	2
CST<WT	BP	GO:2000378	negative regulation of reactive oxygen species metabolic process	2/127	57/13966	0.0948180886072741	0.358984080910765	0.306192534984079	Atp2b4/Cd34	2
CST<WT	CC	GO:0000153	cytoplasmic ubiquitin ligase complex	1/129	11/14212	0.0954670698243951	0.287461954693456	0.226664504963184	Sel1l	1
CST<WT	CC	GO:0001518	voltage-gated sodium channel complex	1/129	11/14212	0.0954670698243951	0.287461954693456	0.226664504963184	Scn3b	1
CST<WT	CC	GO:0032591	dendritic spine membrane	1/129	11/14212	0.0954670698243951	0.287461954693456	0.226664504963184	Shisa7	1
CST<WT	BP	GO:0051051	negative regulation of transport	7/127	428/13966	0.0955331196167433	0.358984080910765	0.306192534984079	Cd34/Npy1r/Ank3/Syt4/Gnaq/Agtr2/Ubqln2	7
CST<WT	BP	GO:0002431	Fc receptor mediated stimulatory signaling pathway	1/127	11/13966	0.0956351286879884	0.358984080910765	0.306192534984079	Fcer1g	1
CST<WT	BP	GO:0007213	G protein-coupled acetylcholine receptor signaling pathway	1/127	11/13966	0.0956351286879884	0.358984080910765	0.306192534984079	Chrm3	1
CST<WT	BP	GO:0009310	amine catabolic process	1/127	11/13966	0.0956351286879884	0.358984080910765	0.306192534984079	Atp2b4	1
CST<WT	BP	GO:0010359	regulation of anion channel activity	1/127	11/13966	0.0956351286879884	0.358984080910765	0.306192534984079	Grm5	1
CST<WT	BP	GO:0010882	regulation of cardiac muscle contraction by calcium ion signaling	1/127	11/13966	0.0956351286879884	0.358984080910765	0.306192534984079	Ryr2	1
CST<WT	BP	GO:0021694	cerebellar Purkinje cell layer formation	1/127	11/13966	0.0956351286879884	0.358984080910765	0.306192534984079	Faim2	1
CST<WT	BP	GO:0031630	regulation of synaptic vesicle fusion to presynaptic active zone membrane	1/127	11/13966	0.0956351286879884	0.358984080910765	0.306192534984079	Syt1	1
CST<WT	BP	GO:0032769	negative regulation of monooxygenase activity	1/127	11/13966	0.0956351286879884	0.358984080910765	0.306192534984079	Atp2b4	1
CST<WT	BP	GO:0035330	regulation of hippo signaling	1/127	11/13966	0.0956351286879884	0.358984080910765	0.306192534984079	Sox11	1
CST<WT	BP	GO:0035815	positive regulation of renal sodium excretion	1/127	11/13966	0.0956351286879884	0.358984080910765	0.306192534984079	Agtr2	1
CST<WT	BP	GO:0045161	neuronal ion channel clustering	1/127	11/13966	0.0956351286879884	0.358984080910765	0.306192534984079	Cntnap2	1
CST<WT	BP	GO:0045945	positive regulation of transcription by RNA polymerase III	1/127	11/13966	0.0956351286879884	0.358984080910765	0.306192534984079	Ar	1
CST<WT	BP	GO:0048484	enteric nervous system development	1/127	11/13966	0.0956351286879884	0.358984080910765	0.306192534984079	Pds5b	1
CST<WT	BP	GO:0051284	positive regulation of sequestering of calcium ion	1/127	11/13966	0.0956351286879884	0.358984080910765	0.306192534984079	Ryr2	1
CST<WT	BP	GO:0051967	negative regulation of synaptic transmission, glutamatergic	1/127	11/13966	0.0956351286879884	0.358984080910765	0.306192534984079	Grik3	1
CST<WT	BP	GO:0060502	epithelial cell proliferation involved in lung morphogenesis	1/127	11/13966	0.0956351286879884	0.358984080910765	0.306192534984079	Foxp2	1
CST<WT	BP	GO:0060575	intestinal epithelial cell differentiation	1/127	11/13966	0.0956351286879884	0.358984080910765	0.306192534984079	Cbfa2t2	1
CST<WT	BP	GO:0060736	prostate gland growth	1/127	11/13966	0.0956351286879884	0.358984080910765	0.306192534984079	Ar	1
CST<WT	BP	GO:0060768	regulation of epithelial cell proliferation involved in prostate gland development	1/127	11/13966	0.0956351286879884	0.358984080910765	0.306192534984079	Ar	1
CST<WT	BP	GO:0061308	cardiac neural crest cell development involved in heart development	1/127	11/13966	0.0956351286879884	0.358984080910765	0.306192534984079	Mapk1	1
CST<WT	BP	GO:0086103	G protein-coupled receptor signaling pathway involved in heart process	1/127	11/13966	0.0956351286879884	0.358984080910765	0.306192534984079	Atp2b4	1
CST<WT	BP	GO:0090192	regulation of glomerulus development	1/127	11/13966	0.0956351286879884	0.358984080910765	0.306192534984079	Agtr2	1
CST<WT	BP	GO:0090557	establishment of endothelial intestinal barrier	1/127	11/13966	0.0956351286879884	0.358984080910765	0.306192534984079	Rapgef2	1
CST<WT	BP	GO:0097012	response to granulocyte macrophage colony-stimulating factor	1/127	11/13966	0.0956351286879884	0.358984080910765	0.306192534984079	Mapk1	1
CST<WT	BP	GO:0097428	protein maturation by iron-sulfur cluster transfer	1/127	11/13966	0.0956351286879884	0.358984080910765	0.306192534984079	Yae1d1	1
CST<WT	BP	GO:0097531	mast cell migration	1/127	11/13966	0.0956351286879884	0.358984080910765	0.306192534984079	Vegfd	1
CST<WT	BP	GO:0098935	dendritic transport	1/127	11/13966	0.0956351286879884	0.358984080910765	0.306192534984079	Wasf1	1
CST<WT	BP	GO:0106072	negative regulation of adenylate cyclase-activating G protein-coupled receptor signaling pathway	1/127	11/13966	0.0956351286879884	0.358984080910765	0.306192534984079	Atp2b4	1
CST<WT	BP	GO:1902805	positive regulation of synaptic vesicle transport	1/127	11/13966	0.0956351286879884	0.358984080910765	0.306192534984079	Syt1	1
CST<WT	MF	GO:0022843	voltage-gated cation channel activity	3/123	123/13889	0.0958049125169836	0.362864827606015	0.313102045465828	Cacna1e/Cacnb2/Grin2b	3
CST<WT	BP	GO:0031099	regeneration	3/127	120/13966	0.0961961125955048	0.358984080910765	0.306192534984079	Igf1r/Ntrk3/Matn2	3
WT<CST	BP	GO:0043949	regulation of cAMP-mediated signaling	2/131	56/13966	0.0969603428901771	0.489968888994605	0.45999924144586	Chga/Adcyap1	2
WT<CST	BP	GO:0050818	regulation of coagulation	2/131	56/13966	0.0969603428901771	0.489968888994605	0.45999924144586	Serpine1/Plau	2
WT<CST	BP	GO:1901606	alpha-amino acid catabolic process	2/131	56/13966	0.0969603428901771	0.489968888994605	0.45999924144586	Ddah1/Amt	2
CST<WT	CC	GO:0043204	perikaryon	3/129	121/14212	0.0976267298934131	0.290734547264999	0.229244952786152	Cacna1e/Grik3/Mapk1	3
CST<WT	BP	GO:0001885	endothelial cell development	2/127	58/13966	0.0976417658232846	0.358984080910765	0.306192534984079	Rapgef2/Met	2
CST<WT	BP	GO:0030641	regulation of cellular pH	2/127	58/13966	0.0976417658232846	0.358984080910765	0.306192534984079	Slc4a8/Mapk1	2
CST<WT	BP	GO:0032418	lysosome localization	2/127	58/13966	0.0976417658232846	0.358984080910765	0.306192534984079	Fcer1g/Pla2g3	2
CST<WT	BP	GO:0097306	cellular response to alcohol	2/127	58/13966	0.0976417658232846	0.358984080910765	0.306192534984079	Epha5/Glra3	2
CST<WT	BP	GO:1903169	regulation of calcium ion transmembrane transport	3/127	121/13966	0.0980182854598863	0.358984080910765	0.306192534984079	Nos1ap/Cacnb2/Ryr2	3
WT<CST	MF	GO:0003906	DNA-(apurinic or apyrimidinic site) endonuclease activity	1/130	11/13889	0.0983072812554971	0.413634927464313	0.377632977552157	Hmga1	1
WT<CST	MF	GO:0030548	acetylcholine receptor regulator activity	1/130	11/13889	0.0983072812554971	0.413634927464313	0.377632977552157	Lynx1	1
WT<CST	MF	GO:0042166	acetylcholine binding	1/130	11/13889	0.0983072812554971	0.413634927464313	0.377632977552157	Ache	1
WT<CST	MF	GO:0099602	neurotransmitter receptor regulator activity	1/130	11/13889	0.0983072812554971	0.413634927464313	0.377632977552157	Lynx1	1
WT<CST	BP	GO:0006047	UDP-N-acetylglucosamine metabolic process	1/131	11/13966	0.0985073694263998	0.489968888994605	0.45999924144586	Uap1l1	1
WT<CST	BP	GO:0006670	sphingosine metabolic process	1/131	11/13966	0.0985073694263998	0.489968888994605	0.45999924144586	Sphk1	1
WT<CST	BP	GO:0010755	regulation of plasminogen activation	1/131	11/13966	0.0985073694263998	0.489968888994605	0.45999924144586	Serpine1	1
WT<CST	BP	GO:0015802	basic amino acid transport	1/131	11/13966	0.0985073694263998	0.489968888994605	0.45999924144586	Slc38a3	1
WT<CST	BP	GO:0031630	regulation of synaptic vesicle fusion to presynaptic active zone membrane	1/131	11/13966	0.0985073694263998	0.489968888994605	0.45999924144586	Syt2	1
WT<CST	BP	GO:0032769	negative regulation of monooxygenase activity	1/131	11/13966	0.0985073694263998	0.489968888994605	0.45999924144586	Gla	1
WT<CST	BP	GO:0045837	negative regulation of membrane potential	1/131	11/13966	0.0985073694263998	0.489968888994605	0.45999924144586	Ptn	1
WT<CST	BP	GO:0046348	amino sugar catabolic process	1/131	11/13966	0.0985073694263998	0.489968888994605	0.45999924144586	Chil3	1
WT<CST	BP	GO:0048672	positive regulation of collateral sprouting	1/131	11/13966	0.0985073694263998	0.489968888994605	0.45999924144586	Bdnf	1
WT<CST	BP	GO:0050746	regulation of lipoprotein metabolic process	1/131	11/13966	0.0985073694263998	0.489968888994605	0.45999924144586	Lipg	1
WT<CST	BP	GO:0060768	regulation of epithelial cell proliferation involved in prostate gland development	1/131	11/13966	0.0985073694263998	0.489968888994605	0.45999924144586	Serpinf1	1
WT<CST	BP	GO:0070444	oligodendrocyte progenitor proliferation	1/131	11/13966	0.0985073694263998	0.489968888994605	0.45999924144586	Adcyap1	1
WT<CST	BP	GO:0070445	regulation of oligodendrocyte progenitor proliferation	1/131	11/13966	0.0985073694263998	0.489968888994605	0.45999924144586	Adcyap1	1
WT<CST	BP	GO:0097012	response to granulocyte macrophage colony-stimulating factor	1/131	11/13966	0.0985073694263998	0.489968888994605	0.45999924144586	Csf2ra	1
WT<CST	BP	GO:0097421	liver regeneration	1/131	11/13966	0.0985073694263998	0.489968888994605	0.45999924144586	Ccnd1	1
WT<CST	BP	GO:0097531	mast cell migration	1/131	11/13966	0.0985073694263998	0.489968888994605	0.45999924144586	Chga	1
WT<CST	BP	GO:1902805	positive regulation of synaptic vesicle transport	1/131	11/13966	0.0985073694263998	0.489968888994605	0.45999924144586	Syt2	1
WT<CST	BP	GO:1990440	positive regulation of transcription from RNA polymerase II promoter in response to endoplasmic reticulum stress	1/131	11/13966	0.0985073694263998	0.489968888994605	0.45999924144586	Creb3l1	1
WT<CST	BP	GO:2000322	regulation of glucocorticoid receptor signaling pathway	1/131	11/13966	0.0985073694263998	0.489968888994605	0.45999924144586	Bdnf	1
CST<WT	MF	GO:0060589	nucleoside-triphosphatase regulator activity	5/123	276/13889	0.0985726925032904	0.362864827606015	0.313102045465828	Adgrb3/Rapgef2/Arhgap32/Fam13b/Gnaq	5
CST<WT	BP	GO:0018209	peptidyl-serine modification	5/127	269/13966	0.098859384027513	0.358984080910765	0.306192534984079	Atp2b4/Met/Prkcg/Ntrk3/Mapk1	5
WT<CST	CC	GO:0042555	MCM complex	1/134	11/14212	0.0989946349531967	0.564876436029751	0.537977558123572	Mcm5	1
WT<CST	CC	GO:0070852	cell body fiber	1/134	11/14212	0.0989946349531967	0.564876436029751	0.537977558123572	Adcyap1	1
WT<CST	BP	GO:0034728	nucleosome organization	3/131	118/13966	0.0993306737567875	0.489968888994605	0.45999924144586	Hist1h4k/Hist1h1e/Hist1h1c	3
WT<CST	MF	GO:0015294	solute:cation symporter activity	2/130	57/13889	0.0995339056840765	0.413634927464313	0.377632977552157	Slc5a5/Slc12a4	2
WT<CST	BP	GO:0006809	nitric oxide biosynthetic process	2/131	57/13966	0.0998923884509502	0.489968888994605	0.45999924144586	Ddah1/Gla	2
CST<WT	BP	GO:0003208	cardiac ventricle morphogenesis	2/127	59/13966	0.100489157830359	0.358984080910765	0.306192534984079	Sox11/Ryr2	2
CST<WT	BP	GO:0051341	regulation of oxidoreductase activity	2/127	59/13966	0.100489157830359	0.358984080910765	0.306192534984079	Atp2b4/Agtr2	2
CST<WT	BP	GO:1904427	positive regulation of calcium ion transmembrane transport	2/127	59/13966	0.100489157830359	0.358984080910765	0.306192534984079	Cacnb2/Ryr2	2
WT<CST	CC	GO:0043292	contractile fiber	4/134	187/14212	0.10064685773748	0.564876436029751	0.537977558123572	Igfn1/Ank1/Pdlim3/Myl4	4
CST<WT	BP	GO:0006898	receptor-mediated endocytosis	4/127	194/13966	0.100761461532506	0.358984080910765	0.306192534984079	Fcer1g/Gsg1l/Wasf1/Ubqln2	4
CST<WT	BP	GO:0050708	regulation of protein secretion	6/127	351/13966	0.10091134108644	0.358984080910765	0.306192534984079	Cacna1e/Cd34/Epha5/Gpr68/Syt4/Agtr2	6
WT<CST	BP	GO:0035966	response to topologically incorrect protein	3/131	119/13966	0.101235426821332	0.489968888994605	0.45999924144586	Bok/Creb3l1/Ccnd1	3
CST<WT	MF	GO:0000900	translation repressor activity, mRNA regulatory element binding	1/123	12/13889	0.101282915358936	0.362864827606015	0.313102045465828	Cpeb2	1
CST<WT	MF	GO:0004708	MAP kinase kinase activity	1/123	12/13889	0.101282915358936	0.362864827606015	0.313102045465828	Mapk1	1
CST<WT	MF	GO:0005522	profilin binding	1/123	12/13889	0.101282915358936	0.362864827606015	0.313102045465828	Pclo	1
CST<WT	MF	GO:0043176	amine binding	1/123	12/13889	0.101282915358936	0.362864827606015	0.313102045465828	Htr1a	1
WT<CST	BP	GO:0010959	regulation of metal ion transport	6/131	341/13966	0.101721998143303	0.489968888994605	0.45999924144586	Pacsin3/Kcnip3/Serpine1/Ramp3/Stac2/Adcyap1	6
CST<WT	MF	GO:0000982	transcription factor activity, RNA polymerase II proximal promoter sequence-specific DNA binding	6/123	362/13889	0.102433092859462	0.362864827606015	0.313102045465828	Foxp2/Hlf/Sox11/Etv1/Ssbp2/Ar	6
WT<CST	MF	GO:0015171	amino acid transmembrane transporter activity	2/130	58/13889	0.102481314343097	0.413634927464313	0.377632977552157	Slc7a10/Slc38a3	2
WT<CST	MF	GO:0016597	amino acid binding	2/130	58/13889	0.102481314343097	0.413634927464313	0.377632977552157	Gad1/Ddah1	2
WT<CST	MF	GO:0017124	SH3 domain binding	3/130	120/13889	0.102658159863849	0.413634927464313	0.377632977552157	Vasp/Gpx1/Arhgap31	3
WT<CST	BP	GO:0001885	endothelial cell development	2/131	58/13966	0.102849112907578	0.489968888994605	0.45999924144586	Gpx1/Tnmd	2
WT<CST	BP	GO:0030641	regulation of cellular pH	2/131	58/13966	0.102849112907578	0.489968888994605	0.45999924144586	Atp6v0c/Nox1	2
WT<CST	BP	GO:0045471	response to ethanol	2/131	58/13966	0.102849112907578	0.489968888994605	0.45999924144586	Crhbp/Adcyap1	2
CST<WT	MF	GO:0019838	growth factor binding	3/123	127/13889	0.102969395730757	0.362864827606015	0.313102045465828	Igf1r/Ntrk3/Crim1	3
CST<WT	MF	GO:0060090	molecular adaptor activity	3/123	127/13889	0.102969395730757	0.362864827606015	0.313102045465828	Ksr2/Ank3/Sla	3
CST<WT	CC	GO:0030667	secretory granule membrane	2/129	60/14212	0.103048827341541	0.295771473751046	0.233216582526558	Moxd1/Syt4	2
CST<WT	MF	GO:0001664	G protein-coupled receptor binding	4/123	201/13889	0.103237598840021	0.362864827606015	0.313102045465828	Rapgef2/Grin2b/Grm5/Gnaq	4
CST<WT	BP	GO:0031016	pancreas development	2/127	60/13966	0.103359608387196	0.358984080910765	0.306192534984079	Igf1r/Fgf10	2
CST<WT	BP	GO:0045739	positive regulation of DNA repair	2/127	60/13966	0.103359608387196	0.358984080910765	0.306192534984079	Prkcg/Fgf10	2
CST<WT	BP	GO:0046209	nitric oxide metabolic process	2/127	60/13966	0.103359608387196	0.358984080910765	0.306192534984079	Atp2b4/Cd34	2
CST<WT	BP	GO:0051785	positive regulation of nuclear division	2/127	60/13966	0.103359608387196	0.358984080910765	0.306192534984079	Met/Igf1r	2
CST<WT	BP	GO:0001890	placenta development	3/127	124/13966	0.103568394352386	0.358984080910765	0.306192534984079	Ncoa6/Met/Mapk1	3
CST<WT	BP	GO:0048675	axon extension	3/127	124/13966	0.103568394352386	0.358984080910765	0.306192534984079	Raph1/Ntrk3/Dpysl2	3
CST<WT	BP	GO:0106106	cold-induced thermogenesis	3/127	124/13966	0.103568394352386	0.358984080910765	0.306192534984079	Ksr2/Nova2/Igf1r	3
CST<WT	BP	GO:0120161	regulation of cold-induced thermogenesis	3/127	124/13966	0.103568394352386	0.358984080910765	0.306192534984079	Ksr2/Nova2/Igf1r	3
CST<WT	BP	GO:1904064	positive regulation of cation transmembrane transport	3/127	124/13966	0.103568394352386	0.358984080910765	0.306192534984079	Cacnb2/Ank3/Ryr2	3
CST<WT	BP	GO:0042063	gliogenesis	5/127	273/13966	0.103585694198408	0.358984080910765	0.306192534984079	Ntrk3/Sox11/Fgf10/Matn2/Mapk1	5
CST<WT	BP	GO:0051048	negative regulation of secretion	4/127	196/13966	0.103621045914523	0.358984080910765	0.306192534984079	Cd34/Npy1r/Syt4/Agtr2	4
CST<WT	BP	GO:0060541	respiratory system development	4/127	196/13966	0.103621045914523	0.358984080910765	0.306192534984079	Foxp2/Sox11/Fgf10/Mapk1	4
CST<WT	BP	GO:0051345	positive regulation of hydrolase activity	7/127	437/13966	0.103682078002331	0.358984080910765	0.306192534984079	Rapgef2/Grin2b/Ntrk3/Ryr2/Fgf10/Gnaq/Agtr2	7
CST<WT	CC	GO:0098684	photoreceptor ribbon synapse	1/129	12/14212	0.103683726960699	0.295771473751046	0.233216582526558	Cacnb2	1
CST<WT	CC	GO:0098690	glycinergic synapse	1/129	12/14212	0.103683726960699	0.295771473751046	0.233216582526558	Glra3	1
CST<WT	CC	GO:0098992	neuronal dense core vesicle	1/129	12/14212	0.103683726960699	0.295771473751046	0.233216582526558	Syt4	1
CST<WT	BP	GO:0001675	acrosome assembly	1/127	12/13966	0.103865464671982	0.358984080910765	0.306192534984079	Pla2g3	1
CST<WT	BP	GO:0002864	regulation of acute inflammatory response to antigenic stimulus	1/127	12/13966	0.103865464671982	0.358984080910765	0.306192534984079	Fcer1g	1
CST<WT	BP	GO:0006525	arginine metabolic process	1/127	12/13966	0.103865464671982	0.358984080910765	0.306192534984079	Atp2b4	1
CST<WT	BP	GO:0014745	negative regulation of muscle adaptation	1/127	12/13966	0.103865464671982	0.358984080910765	0.306192534984079	Atp2b4	1
CST<WT	BP	GO:0014850	response to muscle activity	1/127	12/13966	0.103865464671982	0.358984080910765	0.306192534984079	Ryr2	1
CST<WT	BP	GO:0015701	bicarbonate transport	1/127	12/13966	0.103865464671982	0.358984080910765	0.306192534984079	Slc4a8	1
CST<WT	BP	GO:0031000	response to caffeine	1/127	12/13966	0.103865464671982	0.358984080910765	0.306192534984079	Ryr2	1
CST<WT	BP	GO:0032488	Cdc42 protein signal transduction	1/127	12/13966	0.103865464671982	0.358984080910765	0.306192534984079	Rhou	1
CST<WT	BP	GO:0033690	positive regulation of osteoblast proliferation	1/127	12/13966	0.103865464671982	0.358984080910765	0.306192534984079	Igf1r	1
CST<WT	BP	GO:0036270	response to diuretic	1/127	12/13966	0.103865464671982	0.358984080910765	0.306192534984079	Ryr2	1
CST<WT	BP	GO:0042403	thyroid hormone metabolic process	1/127	12/13966	0.103865464671982	0.358984080910765	0.306192534984079	Crym	1
CST<WT	BP	GO:0045760	positive regulation of action potential	1/127	12/13966	0.103865464671982	0.358984080910765	0.306192534984079	Ank3	1
CST<WT	BP	GO:0045955	negative regulation of calcium ion-dependent exocytosis	1/127	12/13966	0.103865464671982	0.358984080910765	0.306192534984079	Syt4	1
CST<WT	BP	GO:0046929	negative regulation of neurotransmitter secretion	1/127	12/13966	0.103865464671982	0.358984080910765	0.306192534984079	Syt4	1
CST<WT	BP	GO:0048012	hepatocyte growth factor receptor signaling pathway	1/127	12/13966	0.103865464671982	0.358984080910765	0.306192534984079	Met	1
CST<WT	BP	GO:0050872	white fat cell differentiation	1/127	12/13966	0.103865464671982	0.358984080910765	0.306192534984079	Fgf10	1
CST<WT	BP	GO:0060439	trachea morphogenesis	1/127	12/13966	0.103865464671982	0.358984080910765	0.306192534984079	Mapk1	1
CST<WT	BP	GO:0060767	epithelial cell proliferation involved in prostate gland development	1/127	12/13966	0.103865464671982	0.358984080910765	0.306192534984079	Ar	1
CST<WT	BP	GO:0061307	cardiac neural crest cell differentiation involved in heart development	1/127	12/13966	0.103865464671982	0.358984080910765	0.306192534984079	Mapk1	1
CST<WT	BP	GO:0061436	establishment of skin barrier	1/127	12/13966	0.103865464671982	0.358984080910765	0.306192534984079	Met	1
CST<WT	BP	GO:0071636	positive regulation of transforming growth factor beta production	1/127	12/13966	0.103865464671982	0.358984080910765	0.306192534984079	Cd34	1
CST<WT	BP	GO:0098911	regulation of ventricular cardiac muscle cell action potential	1/127	12/13966	0.103865464671982	0.358984080910765	0.306192534984079	Ryr2	1
CST<WT	BP	GO:1901298	regulation of hydrogen peroxide-mediated programmed cell death	1/127	12/13966	0.103865464671982	0.358984080910765	0.306192534984079	Met	1
CST<WT	BP	GO:1901387	positive regulation of voltage-gated calcium channel activity	1/127	12/13966	0.103865464671982	0.358984080910765	0.306192534984079	Cacnb2	1
CST<WT	BP	GO:1901660	calcium ion export	1/127	12/13966	0.103865464671982	0.358984080910765	0.306192534984079	Atp2b4	1
CST<WT	BP	GO:1902950	regulation of dendritic spine maintenance	1/127	12/13966	0.103865464671982	0.358984080910765	0.306192534984079	Grin2b	1
CST<WT	BP	GO:1903729	regulation of plasma membrane organization	1/127	12/13966	0.103865464671982	0.358984080910765	0.306192534984079	Ar	1
CST<WT	BP	GO:1904181	positive regulation of membrane depolarization	1/127	12/13966	0.103865464671982	0.358984080910765	0.306192534984079	Ank3	1
CST<WT	BP	GO:1904294	positive regulation of ERAD pathway	1/127	12/13966	0.103865464671982	0.358984080910765	0.306192534984079	Ubqln2	1
CST<WT	BP	GO:1904321	response to forskolin	1/127	12/13966	0.103865464671982	0.358984080910765	0.306192534984079	Epha5	1
CST<WT	BP	GO:1904322	cellular response to forskolin	1/127	12/13966	0.103865464671982	0.358984080910765	0.306192534984079	Epha5	1
WT<CST	CC	GO:0000790	nuclear chromatin	6/134	342/14212	0.104741013502259	0.564876436029751	0.537977558123572	Creb3l1/Klf1/Hist1h4k/Hist1h1e/Hist1h1c/Irf4	6
WT<CST	BP	GO:0070372	regulation of ERK1 and ERK2 cascade	5/131	266/13966	0.105272468367443	0.489968888994605	0.45999924144586	Hcrtr1/Dusp4/Ramp3/Alkal2/Adcyap1	5
CST<WT	BP	GO:0002009	morphogenesis of an epithelium	7/127	439/13966	0.105543216455504	0.36358267439206	0.310114867673112	Met/Igf1r/Sox11/Ryr2/Fgf10/Agtr2/Ar	7
WT<CST	BP	GO:0003333	amino acid transmembrane transport	2/131	59/13966	0.105829804273769	0.489968888994605	0.45999924144586	Slc7a10/Slc38a3	2
WT<CST	BP	GO:0008543	fibroblast growth factor receptor signaling pathway	2/131	59/13966	0.105829804273769	0.489968888994605	0.45999924144586	Creb3l1/Apln	2
WT<CST	BP	GO:1904427	positive regulation of calcium ion transmembrane transport	2/131	59/13966	0.105829804273769	0.489968888994605	0.45999924144586	Ramp3/Stac2	2
WT<CST	BP	GO:2001244	positive regulation of intrinsic apoptotic signaling pathway	2/131	59/13966	0.105829804273769	0.489968888994605	0.45999924144586	Bok/Nox1	2
CST<WT	BP	GO:0014706	striated muscle tissue development	6/127	356/13966	0.106095966194674	0.36358267439206	0.310114867673112	Foxp2/Met/Hlf/Sox11/Ryr2/Agtr2	6
CST<WT	BP	GO:0001656	metanephros development	2/127	61/13966	0.106252471055214	0.36358267439206	0.310114867673112	Fgf10/Agtr2	2
CST<WT	BP	GO:0002275	myeloid cell activation involved in immune response	2/127	61/13966	0.106252471055214	0.36358267439206	0.310114867673112	Fcer1g/Pla2g3	2
CST<WT	BP	GO:0035914	skeletal muscle cell differentiation	2/127	61/13966	0.106252471055214	0.36358267439206	0.310114867673112	Hlf/Sox11	2
CST<WT	BP	GO:0051781	positive regulation of cell division	2/127	61/13966	0.106252471055214	0.36358267439206	0.310114867673112	Igf1r/Vegfd	2
CST<WT	BP	GO:2000243	positive regulation of reproductive process	2/127	61/13966	0.106252471055214	0.36358267439206	0.310114867673112	Igf1r/Ar	2
CST<WT	CC	GO:0012506	vesicle membrane	5/129	276/14212	0.106622094958708	0.300985288893852	0.237327689436597	Moxd1/Syt1/Nsg2/Ryr2/Syt4	5
WT<CST	MF	GO:0003951	NAD+ kinase activity	1/130	12/13889	0.106753747132193	0.413634927464313	0.377632977552157	Sphk1	1
WT<CST	MF	GO:0004115	3',5'-cyclic-AMP phosphodiesterase activity	1/130	12/13889	0.106753747132193	0.413634927464313	0.377632977552157	Pde4c	1
WT<CST	MF	GO:0005522	profilin binding	1/130	12/13889	0.106753747132193	0.413634927464313	0.377632977552157	Vasp	1
WT<CST	MF	GO:0017017	MAP kinase tyrosine/serine/threonine phosphatase activity	1/130	12/13889	0.106753747132193	0.413634927464313	0.377632977552157	Dusp4	1
WT<CST	MF	GO:0042288	MHC class I protein binding	1/130	12/13889	0.106753747132193	0.413634927464313	0.377632977552157	H2-T23	1
WT<CST	MF	GO:0051400	BH domain binding	1/130	12/13889	0.106753747132193	0.413634927464313	0.377632977552157	Bok	1
WT<CST	MF	GO:0051428	peptide hormone receptor binding	1/130	12/13889	0.106753747132193	0.413634927464313	0.377632977552157	Adcyap1	1
WT<CST	BP	GO:0002716	negative regulation of natural killer cell mediated immunity	1/131	12/13966	0.106969965958477	0.489968888994605	0.45999924144586	H2-T23	1
WT<CST	BP	GO:0002864	regulation of acute inflammatory response to antigenic stimulus	1/131	12/13966	0.106969965958477	0.489968888994605	0.45999924144586	Adcyap1	1
WT<CST	BP	GO:0006525	arginine metabolic process	1/131	12/13966	0.106969965958477	0.489968888994605	0.45999924144586	Ddah1	1
WT<CST	BP	GO:0007614	short-term memory	1/131	12/13966	0.106969965958477	0.489968888994605	0.45999924144586	Serpinf1	1
WT<CST	BP	GO:0031650	regulation of heat generation	1/131	12/13966	0.106969965958477	0.489968888994605	0.45999924144586	Apln	1
WT<CST	BP	GO:0032634	interleukin-5 production	1/131	12/13966	0.106969965958477	0.489968888994605	0.45999924144586	Crlf2	1
WT<CST	BP	GO:0032674	regulation of interleukin-5 production	1/131	12/13966	0.106969965958477	0.489968888994605	0.45999924144586	Crlf2	1
WT<CST	BP	GO:0032717	negative regulation of interleukin-8 production	1/131	12/13966	0.106969965958477	0.489968888994605	0.45999924144586	Anxa4	1
WT<CST	BP	GO:0035751	regulation of lysosomal lumen pH	1/131	12/13966	0.106969965958477	0.489968888994605	0.45999924144586	Atp6v0c	1
WT<CST	BP	GO:0036295	cellular response to increased oxygen levels	1/131	12/13966	0.106969965958477	0.489968888994605	0.45999924144586	Nox1	1
WT<CST	BP	GO:0042403	thyroid hormone metabolic process	1/131	12/13966	0.106969965958477	0.489968888994605	0.45999924144586	Slc5a5	1
WT<CST	BP	GO:0043249	erythrocyte maturation	1/131	12/13966	0.106969965958477	0.489968888994605	0.45999924144586	Klf1	1
WT<CST	BP	GO:0043369	CD4-positive or CD8-positive, alpha-beta T cell lineage commitment	1/131	12/13966	0.106969965958477	0.489968888994605	0.45999924144586	Irf4	1
WT<CST	BP	GO:0045906	negative regulation of vasoconstriction	1/131	12/13966	0.106969965958477	0.489968888994605	0.45999924144586	Apln	1
WT<CST	BP	GO:0045953	negative regulation of natural killer cell mediated cytotoxicity	1/131	12/13966	0.106969965958477	0.489968888994605	0.45999924144586	H2-T23	1
WT<CST	BP	GO:0051023	regulation of immunoglobulin secretion	1/131	12/13966	0.106969965958477	0.489968888994605	0.45999924144586	H2-T23	1
WT<CST	BP	GO:0055119	relaxation of cardiac muscle	1/131	12/13966	0.106969965958477	0.489968888994605	0.45999924144586	Chga	1
WT<CST	BP	GO:0060767	epithelial cell proliferation involved in prostate gland development	1/131	12/13966	0.106969965958477	0.489968888994605	0.45999924144586	Serpinf1	1
WT<CST	BP	GO:0071391	cellular response to estrogen stimulus	1/131	12/13966	0.106969965958477	0.489968888994605	0.45999924144586	Crhbp	1
WT<CST	BP	GO:0098703	calcium ion import across plasma membrane	1/131	12/13966	0.106969965958477	0.489968888994605	0.45999924144586	Ramp3	1
WT<CST	BP	GO:1901387	positive regulation of voltage-gated calcium channel activity	1/131	12/13966	0.106969965958477	0.489968888994605	0.45999924144586	Stac2	1
WT<CST	BP	GO:1902656	calcium ion import into cytosol	1/131	12/13966	0.106969965958477	0.489968888994605	0.45999924144586	Ramp3	1
WT<CST	BP	GO:1903729	regulation of plasma membrane organization	1/131	12/13966	0.106969965958477	0.489968888994605	0.45999924144586	Nox1	1
WT<CST	BP	GO:2001185	regulation of CD8-positive, alpha-beta T cell activation	1/131	12/13966	0.106969965958477	0.489968888994605	0.45999924144586	H2-T23	1
WT<CST	BP	GO:0042742	defense response to bacterium	3/131	122/13966	0.107036938464424	0.489968888994605	0.45999924144586	Serpine1/Chga/H2-T23	3
WT<CST	CC	GO:0030061	mitochondrial crista	1/134	12/14212	0.107496481225732	0.564876436029751	0.537977558123572	Bdnf	1
WT<CST	CC	GO:0045095	keratin filament	1/134	12/14212	0.107496481225732	0.564876436029751	0.537977558123572	Krt80	1
WT<CST	CC	GO:0098992	neuronal dense core vesicle	1/134	12/14212	0.107496481225732	0.564876436029751	0.537977558123572	Scg2	1
WT<CST	BP	GO:0051051	negative regulation of transport	7/131	428/13966	0.107951175044516	0.489968888994605	0.45999924144586	Bok/Pacsin3/Anxa4/Pde4c/Chga/Crhbp/Adcyap1	7
WT<CST	CC	GO:0045211	postsynaptic membrane	6/134	345/14212	0.108013206175984	0.564876436029751	0.537977558123572	Ache/Nptx2/Cadps2/Ank1/Insyn1/Tmem108	6
WT<CST	MF	GO:0005518	collagen binding	2/130	60/13889	0.10844729395817	0.413634927464313	0.377632977552157	Ache/Itga9	2
WT<CST	MF	GO:0016835	carbon-oxygen lyase activity	2/130	60/13889	0.10844729395817	0.413634927464313	0.377632977552157	Car10/Hmga1	2
WT<CST	MF	GO:0005543	phospholipid binding	6/130	348/13889	0.10845092239104	0.413634927464313	0.377632977552157	Syt2/Pacsin3/Anxa4/Myo1c/Pitpnc1/Syt12	6
WT<CST	BP	GO:0043113	receptor clustering	2/131	60/13966	0.108833761562656	0.489968888994605	0.45999924144586	Ptn/Colq	2
WT<CST	BP	GO:0046209	nitric oxide metabolic process	2/131	60/13966	0.108833761562656	0.489968888994605	0.45999924144586	Ddah1/Gla	2
WT<CST	BP	GO:1903035	negative regulation of response to wounding	2/131	60/13966	0.108833761562656	0.489968888994605	0.45999924144586	Serpine1/Plau	2
CST<WT	BP	GO:0000271	polysaccharide biosynthetic process	2/127	62/13966	0.109167109076888	0.365481502893278	0.311734457909016	Ndst3/Dyrk2	2
CST<WT	BP	GO:0002090	regulation of receptor internalization	2/127	62/13966	0.109167109076888	0.365481502893278	0.311734457909016	Gsg1l/Ubqln2	2
CST<WT	BP	GO:0034637	cellular carbohydrate biosynthetic process	2/127	62/13966	0.109167109076888	0.365481502893278	0.311734457909016	Ndst3/Dyrk2	2
CST<WT	BP	GO:0042475	odontogenesis of dentin-containing tooth	2/127	62/13966	0.109167109076888	0.365481502893278	0.311734457909016	Slc24a4/Fgf10	2
CST<WT	BP	GO:0051384	response to glucocorticoid	2/127	62/13966	0.109167109076888	0.365481502893278	0.311734457909016	Gpr83/Agtr2	2
CST<WT	MF	GO:0004707	MAP kinase activity	1/123	13/13889	0.109248772634345	0.364792372393739	0.31476524941906	Mapk1	1
CST<WT	MF	GO:0005005	transmembrane-ephrin receptor activity	1/123	13/13889	0.109248772634345	0.364792372393739	0.31476524941906	Epha5	1
CST<WT	MF	GO:0005172	vascular endothelial growth factor receptor binding	1/123	13/13889	0.109248772634345	0.364792372393739	0.31476524941906	Vegfd	1
CST<WT	MF	GO:0015106	bicarbonate transmembrane transporter activity	1/123	13/13889	0.109248772634345	0.364792372393739	0.31476524941906	Slc4a8	1
CST<WT	MF	GO:0022821	potassium ion antiporter activity	1/123	13/13889	0.109248772634345	0.364792372393739	0.31476524941906	Slc24a4	1
WT<CST	BP	GO:0006874	cellular calcium ion homeostasis	6/131	348/13966	0.109284215613679	0.489968888994605	0.45999924144586	Bok/Hcrtr1/Hcrtr2/Ramp3/Chga/Adcyap1	6
CST<WT	BP	GO:0006813	potassium ion transport	4/127	200/13966	0.109451184784233	0.365481502893278	0.311734457909016	Ank3/Slc24a4/Gnaq/Fhl1	4
CST<WT	MF	GO:0048365	Rac GTPase binding	2/123	64/13889	0.110134122255424	0.364792372393739	0.31476524941906	Pak7/Wasf1	2
WT<CST	BP	GO:0031347	regulation of defense response	7/131	431/13966	0.110901961229616	0.489968888994605	0.45999924144586	Serpine1/Gpx1/H60b/Serpinf1/Irf4/H2-T23/Adcyap1	7
WT<CST	BP	GO:0106106	cold-induced thermogenesis	3/131	124/13966	0.110975673036368	0.489968888994605	0.45999924144586	Ache/Irf4/Adcyap1	3
WT<CST	BP	GO:0120161	regulation of cold-induced thermogenesis	3/131	124/13966	0.110975673036368	0.489968888994605	0.45999924144586	Ache/Irf4/Adcyap1	3
WT<CST	BP	GO:0070374	positive regulation of ERK1 and ERK2 cascade	4/131	195/13966	0.111157346468535	0.489968888994605	0.45999924144586	Hcrtr1/Ramp3/Alkal2/Adcyap1	4
CST<WT	BP	GO:0007224	smoothened signaling pathway	3/127	128/13966	0.111158009074114	0.365481502893278	0.311734457909016	Dync2h1/Dyrk2/Fgf10	3
WT<CST	MF	GO:0030971	receptor tyrosine kinase binding	2/130	61/13889	0.111464480062932	0.413634927464313	0.377632977552157	Alkal2/Dok2	2
CST<WT	CC	GO:0017146	NMDA selective glutamate receptor complex	1/129	13/14212	0.111826318455211	0.306110427286486	0.241368874496627	Grin2b	1
CST<WT	CC	GO:0046930	pore complex	1/129	13/14212	0.111826318455211	0.306110427286486	0.241368874496627	Cd34	1
CST<WT	CC	GO:0098981	cholinergic synapse	1/129	13/14212	0.111826318455211	0.306110427286486	0.241368874496627	Chrna4	1
WT<CST	BP	GO:0051705	multi-organism behavior	2/131	61/13966	0.111860294645729	0.489968888994605	0.45999924144586	Gad1/Crhbp	2
WT<CST	BP	GO:0051781	positive regulation of cell division	2/131	61/13966	0.111860294645729	0.489968888994605	0.45999924144586	Ptn/Gkn1	2
WT<CST	BP	GO:1904377	positive regulation of protein localization to cell periphery	2/131	61/13966	0.111860294645729	0.489968888994605	0.45999924144586	Ramp3/Stac2	2
CST<WT	BP	GO:0001967	suckling behavior	1/127	13/13966	0.112021483447004	0.365481502893278	0.311734457909016	Grin2b	1
CST<WT	BP	GO:0006206	pyrimidine nucleobase metabolic process	1/127	13/13966	0.112021483447004	0.365481502893278	0.311734457909016	Mapk1	1
CST<WT	BP	GO:0009312	oligosaccharide biosynthetic process	1/127	13/13966	0.112021483447004	0.365481502893278	0.311734457909016	B3galt1	1
CST<WT	BP	GO:0010960	magnesium ion homeostasis	1/127	13/13966	0.112021483447004	0.365481502893278	0.311734457909016	Ank3	1
CST<WT	BP	GO:0015697	quaternary ammonium group transport	1/127	13/13966	0.112021483447004	0.365481502893278	0.311734457909016	Slc38a2	1
CST<WT	BP	GO:0030540	female genitalia development	1/127	13/13966	0.112021483447004	0.365481502893278	0.311734457909016	Fgf10	1
CST<WT	BP	GO:0031340	positive regulation of vesicle fusion	1/127	13/13966	0.112021483447004	0.365481502893278	0.311734457909016	Syt1	1
CST<WT	BP	GO:0032095	regulation of response to food	1/127	13/13966	0.112021483447004	0.365481502893278	0.311734457909016	Prkcg	1
CST<WT	BP	GO:0035721	intraciliary retrograde transport	1/127	13/13966	0.112021483447004	0.365481502893278	0.311734457909016	Dync2h1	1
CST<WT	BP	GO:0036035	osteoclast development	1/127	13/13966	0.112021483447004	0.365481502893278	0.311734457909016	Gpr68	1
CST<WT	BP	GO:0042416	dopamine biosynthetic process	1/127	13/13966	0.112021483447004	0.365481502893278	0.311734457909016	Agtr2	1
CST<WT	BP	GO:0042428	serotonin metabolic process	1/127	13/13966	0.112021483447004	0.365481502893278	0.311734457909016	Htr1a	1
CST<WT	BP	GO:0042438	melanin biosynthetic process	1/127	13/13966	0.112021483447004	0.365481502893278	0.311734457909016	Rapgef2	1
CST<WT	BP	GO:0043084	penile erection	1/127	13/13966	0.112021483447004	0.365481502893278	0.311734457909016	Ar	1
CST<WT	BP	GO:0045655	regulation of monocyte differentiation	1/127	13/13966	0.112021483447004	0.365481502893278	0.311734457909016	Gpr68	1
CST<WT	BP	GO:0048485	sympathetic nervous system development	1/127	13/13966	0.112021483447004	0.365481502893278	0.311734457909016	Sox11	1
CST<WT	BP	GO:0048755	branching morphogenesis of a nerve	1/127	13/13966	0.112021483447004	0.365481502893278	0.311734457909016	Rere	1
CST<WT	BP	GO:0051549	positive regulation of keratinocyte migration	1/127	13/13966	0.112021483447004	0.365481502893278	0.311734457909016	Fgf10	1
CST<WT	BP	GO:0061029	eyelid development in camera-type eye	1/127	13/13966	0.112021483447004	0.365481502893278	0.311734457909016	Sox11	1
CST<WT	BP	GO:0061478	response to platelet aggregation inhibitor	1/127	13/13966	0.112021483447004	0.365481502893278	0.311734457909016	Epha5	1
CST<WT	BP	GO:0072520	seminiferous tubule development	1/127	13/13966	0.112021483447004	0.365481502893278	0.311734457909016	Ar	1
CST<WT	BP	GO:1903909	regulation of receptor clustering	1/127	13/13966	0.112021483447004	0.365481502893278	0.311734457909016	Shisa7	1
CST<WT	BP	GO:0007200	phospholipase C-activating G protein-coupled receptor signaling pathway	2/127	63/13966	0.112102895255462	0.365481502893278	0.311734457909016	Grp/Gnaq	2
CST<WT	BP	GO:0007422	peripheral nervous system development	2/127	63/13966	0.112102895255462	0.365481502893278	0.311734457909016	Ntrk3/Etv1	2
CST<WT	BP	GO:0019229	regulation of vasoconstriction	2/127	63/13966	0.112102895255462	0.365481502893278	0.311734457909016	Npy1r/Chrm3	2
CST<WT	BP	GO:0021510	spinal cord development	2/127	63/13966	0.112102895255462	0.365481502893278	0.311734457909016	Dync2h1/Sox11	2
CST<WT	BP	GO:2001259	positive regulation of cation channel activity	2/127	63/13966	0.112102895255462	0.365481502893278	0.311734457909016	Cacnb2/Ank3	2
CST<WT	BP	GO:0007423	sensory organ development	7/127	446/13966	0.112199643931763	0.365481502893278	0.311734457909016	Pds5b/Foxp2/Grin2b/Ntrk3/Sox11/Fgf10/Mapk1	7
CST<WT	BP	GO:0010001	glial cell differentiation	4/127	202/13966	0.112420835883735	0.365481502893278	0.311734457909016	Ntrk3/Sox11/Fgf10/Mapk1	4
CST<WT	BP	GO:2001234	negative regulation of apoptotic signaling pathway	4/127	202/13966	0.112420835883735	0.365481502893278	0.311734457909016	Pak7/Fgf10/Faim2/Ar	4
WT<CST	BP	GO:0051048	negative regulation of secretion	4/131	196/13966	0.112695234462473	0.489968888994605	0.45999924144586	Anxa4/Pde4c/Chga/Crhbp	4
WT<CST	BP	GO:0097191	extrinsic apoptotic signaling pathway	4/131	196/13966	0.112695234462473	0.489968888994605	0.45999924144586	Scg2/Bok/Serpine1/Gpx1	4
CST<WT	MF	GO:0005496	steroid binding	2/123	65/13889	0.112999312907929	0.364792372393739	0.31476524941906	Paqr9/Ar	2
CST<WT	BP	GO:1905114	cell surface receptor signaling pathway involved in cell-cell signaling	7/127	447/13966	0.113168533295075	0.367416437611638	0.313384844647448	Chrna4/Met/Grin2b/Sez6/Ryr2/Fgf10/Gnaq	7
WT<CST	BP	GO:1901215	negative regulation of neuron death	4/131	197/13966	0.114242623114929	0.489968888994605	0.45999924144586	Bok/Bdnf/Serpinf1/Chga	4
WT<CST	MF	GO:0044325	ion channel binding	3/130	126/13889	0.114425642673535	0.413634927464313	0.377632977552157	Kcnip3/Ank1/Kcng4	3
WT<CST	MF	GO:0048306	calcium-dependent protein binding	2/130	62/13889	0.114503558295202	0.413634927464313	0.377632977552157	Kcnip3/Anxa4	2
CST<WT	CC	GO:0032589	neuron projection membrane	2/129	64/14212	0.114717364305891	0.310884057268964	0.24513289425364	Cntnap2/Shisa7	2
WT<CST	BP	GO:0048146	positive regulation of fibroblast proliferation	2/131	62/13966	0.114908724113422	0.489968888994605	0.45999924144586	Serpine1/Sphk1	2
WT<CST	BP	GO:0051384	response to glucocorticoid	2/131	62/13966	0.114908724113422	0.489968888994605	0.45999924144586	Pappa/Adcyap1	2
WT<CST	BP	GO:0034101	erythrocyte homeostasis	3/131	126/13966	0.114969702737667	0.489968888994605	0.45999924144586	Rhd/Ank1/Klf1	3
WT<CST	BP	GO:0046928	regulation of neurotransmitter secretion	3/131	126/13966	0.114969702737667	0.489968888994605	0.45999924144586	Syt2/Sphk1/Syt12	3
CST<WT	BP	GO:2001057	reactive nitrogen species metabolic process	2/127	64/13966	0.115059211836019	0.367636819014488	0.313572817162081	Atp2b4/Cd34	2
WT<CST	MF	GO:0000146	microfilament motor activity	1/130	13/13889	0.11512169502243	0.413634927464313	0.377632977552157	Myo1c	1
WT<CST	MF	GO:0004089	carbonate dehydratase activity	1/130	13/13889	0.11512169502243	0.413634927464313	0.377632977552157	Car10	1
WT<CST	MF	GO:0005165	neurotrophin receptor binding	1/130	13/13889	0.11512169502243	0.413634927464313	0.377632977552157	Bdnf	1
WT<CST	MF	GO:0030296	protein tyrosine kinase activator activity	1/130	13/13889	0.11512169502243	0.413634927464313	0.377632977552157	Alkal2	1
WT<CST	MF	GO:0033130	acetylcholine receptor binding	1/130	13/13889	0.11512169502243	0.413634927464313	0.377632977552157	Lynx1	1
WT<CST	MF	GO:0033549	MAP kinase phosphatase activity	1/130	13/13889	0.11512169502243	0.413634927464313	0.377632977552157	Dusp4	1
WT<CST	MF	GO:0035497	cAMP response element binding	1/130	13/13889	0.11512169502243	0.413634927464313	0.377632977552157	Creb3l1	1
WT<CST	BP	GO:0001821	histamine secretion	1/131	13/13966	0.115353722190342	0.489968888994605	0.45999924144586	Adcyap1	1
WT<CST	BP	GO:0009226	nucleotide-sugar biosynthetic process	1/131	13/13966	0.115353722190342	0.489968888994605	0.45999924144586	Uap1l1	1
WT<CST	BP	GO:0010623	programmed cell death involved in cell development	1/131	13/13966	0.115353722190342	0.489968888994605	0.45999924144586	Bdnf	1
WT<CST	BP	GO:0010832	negative regulation of myotube differentiation	1/131	13/13966	0.115353722190342	0.489968888994605	0.45999924144586	Bdnf	1
WT<CST	BP	GO:0017014	protein nitrosylation	1/131	13/13966	0.115353722190342	0.489968888994605	0.45999924144586	Ddah1	1
WT<CST	BP	GO:0018158	protein oxidation	1/131	13/13966	0.115353722190342	0.489968888994605	0.45999924144586	Gpx1	1
WT<CST	BP	GO:0019377	glycolipid catabolic process	1/131	13/13966	0.115353722190342	0.489968888994605	0.45999924144586	Gla	1
WT<CST	BP	GO:0030502	negative regulation of bone mineralization	1/131	13/13966	0.115353722190342	0.489968888994605	0.45999924144586	Ecm1	1
WT<CST	BP	GO:0031340	positive regulation of vesicle fusion	1/131	13/13966	0.115353722190342	0.489968888994605	0.45999924144586	Syt2	1
WT<CST	BP	GO:0035970	peptidyl-threonine dephosphorylation	1/131	13/13966	0.115353722190342	0.489968888994605	0.45999924144586	Dusp4	1
WT<CST	BP	GO:0036296	response to increased oxygen levels	1/131	13/13966	0.115353722190342	0.489968888994605	0.45999924144586	Nox1	1
WT<CST	BP	GO:0042044	fluid transport	1/131	13/13966	0.115353722190342	0.489968888994605	0.45999924144586	Slc14a1	1
WT<CST	BP	GO:0043011	myeloid dendritic cell differentiation	1/131	13/13966	0.115353722190342	0.489968888994605	0.45999924144586	Irf4	1
WT<CST	BP	GO:0043084	penile erection	1/131	13/13966	0.115353722190342	0.489968888994605	0.45999924144586	Vgf	1
WT<CST	BP	GO:0043116	negative regulation of vascular permeability	1/131	13/13966	0.115353722190342	0.489968888994605	0.45999924144586	Ddah1	1
WT<CST	BP	GO:0045076	regulation of interleukin-2 biosynthetic process	1/131	13/13966	0.115353722190342	0.489968888994605	0.45999924144586	Irf4	1
WT<CST	BP	GO:0045603	positive regulation of endothelial cell differentiation	1/131	13/13966	0.115353722190342	0.489968888994605	0.45999924144586	Tmem100	1
WT<CST	BP	GO:0045989	positive regulation of striated muscle contraction	1/131	13/13966	0.115353722190342	0.489968888994605	0.45999924144586	Chga	1
WT<CST	BP	GO:0046033	AMP metabolic process	1/131	13/13966	0.115353722190342	0.489968888994605	0.45999924144586	Adssl1	1
WT<CST	BP	GO:0046479	glycosphingolipid catabolic process	1/131	13/13966	0.115353722190342	0.489968888994605	0.45999924144586	Gla	1
WT<CST	BP	GO:0046519	sphingoid metabolic process	1/131	13/13966	0.115353722190342	0.489968888994605	0.45999924144586	Sphk1	1
WT<CST	BP	GO:0046641	positive regulation of alpha-beta T cell proliferation	1/131	13/13966	0.115353722190342	0.489968888994605	0.45999924144586	H2-T23	1
WT<CST	BP	GO:0048505	regulation of timing of cell differentiation	1/131	13/13966	0.115353722190342	0.489968888994605	0.45999924144586	Gdpd5	1
WT<CST	BP	GO:0051044	positive regulation of membrane protein ectodomain proteolysis	1/131	13/13966	0.115353722190342	0.489968888994605	0.45999924144586	Pacsin3	1
WT<CST	BP	GO:0051549	positive regulation of keratinocyte migration	1/131	13/13966	0.115353722190342	0.489968888994605	0.45999924144586	Serpine1	1
WT<CST	BP	GO:0055064	chloride ion homeostasis	1/131	13/13966	0.115353722190342	0.489968888994605	0.45999924144586	Slc12a4	1
WT<CST	BP	GO:0060123	regulation of growth hormone secretion	1/131	13/13966	0.115353722190342	0.489968888994605	0.45999924144586	Adcyap1	1
WT<CST	BP	GO:0060546	negative regulation of necroptotic process	1/131	13/13966	0.115353722190342	0.489968888994605	0.45999924144586	Bok	1
WT<CST	BP	GO:0099550	trans-synaptic signaling, modulating synaptic transmission	1/131	13/13966	0.115353722190342	0.489968888994605	0.45999924144586	Bdnf	1
WT<CST	BP	GO:1901077	regulation of relaxation of muscle	1/131	13/13966	0.115353722190342	0.489968888994605	0.45999924144586	Chga	1
WT<CST	BP	GO:1903909	regulation of receptor clustering	1/131	13/13966	0.115353722190342	0.489968888994605	0.45999924144586	Ptn	1
WT<CST	BP	GO:1904706	negative regulation of vascular smooth muscle cell proliferation	1/131	13/13966	0.115353722190342	0.489968888994605	0.45999924144586	Apln	1
WT<CST	BP	GO:1905564	positive regulation of vascular endothelial cell proliferation	1/131	13/13966	0.115353722190342	0.489968888994605	0.45999924144586	Apln	1
WT<CST	BP	GO:2000482	regulation of interleukin-8 secretion	1/131	13/13966	0.115353722190342	0.489968888994605	0.45999924144586	Anxa4	1
WT<CST	BP	GO:2000647	negative regulation of stem cell proliferation	1/131	13/13966	0.115353722190342	0.489968888994605	0.45999924144586	Bdnf	1
WT<CST	BP	GO:2001212	regulation of vasculogenesis	1/131	13/13966	0.115353722190342	0.489968888994605	0.45999924144586	Tmem100	1
CST<WT	BP	GO:0060326	cell chemotaxis	4/127	204/13966	0.115426255850889	0.367636819014488	0.313572817162081	Fcer1g/Met/Lyst/Vegfd	4
WT<CST	CC	GO:0005767	secondary lysosome	1/134	13/14212	0.115918697529658	0.564876436029751	0.537977558123572	Crhbp	1
CST<WT	MF	GO:0008569	ATP-dependent microtubule motor activity, minus-end-directed	1/123	14/13889	0.117144592825032	0.364792372393739	0.31476524941906	Dync2h1	1
CST<WT	MF	GO:0016500	protein-hormone receptor activity	1/123	14/13889	0.117144592825032	0.364792372393739	0.31476524941906	Igf1r	1
CST<WT	MF	GO:0016595	glutamate binding	1/123	14/13889	0.117144592825032	0.364792372393739	0.31476524941906	Grin2b	1
CST<WT	MF	GO:0034483	heparan sulfate sulfotransferase activity	1/123	14/13889	0.117144592825032	0.364792372393739	0.31476524941906	Ndst3	1
CST<WT	MF	GO:0035925	mRNA 3'-UTR AU-rich region binding	1/123	14/13889	0.117144592825032	0.364792372393739	0.31476524941906	Cpeb2	1
CST<WT	MF	GO:0070006	metalloaminopeptidase activity	1/123	14/13889	0.117144592825032	0.364792372393739	0.31476524941906	Trhde	1
WT<CST	MF	GO:0015077	monovalent inorganic cation transmembrane transporter activity	5/130	276/13889	0.117281426097151	0.414006857148708	0.377972535226891	Kcnip3/Slc5a5/Slc12a4/Kcng4/Atp6v0c	5
WT<CST	BP	GO:0006342	chromatin silencing	2/131	63/13966	0.117978381137329	0.489968888994605	0.45999924144586	Hist1h1e/Hist1h1c	2
WT<CST	BP	GO:0007200	phospholipase C-activating G protein-coupled receptor signaling pathway	2/131	63/13966	0.117978381137329	0.489968888994605	0.45999924144586	Hcrtr2/Chga	2
WT<CST	BP	GO:0048168	regulation of neuronal synaptic plasticity	2/131	63/13966	0.117978381137329	0.489968888994605	0.45999924144586	Bdnf/Vgf	2
WT<CST	BP	GO:1903670	regulation of sprouting angiogenesis	2/131	63/13966	0.117978381137329	0.489968888994605	0.45999924144586	Creb3l1/Srpx2	2
CST<WT	BP	GO:0031960	response to corticosteroid	2/127	65/13966	0.118035450387903	0.367636819014488	0.313572817162081	Gpr83/Agtr2	2
WT<CST	MF	GO:0008237	metallopeptidase activity	3/130	128/13889	0.118457728593698	0.414006857148708	0.377972535226891	Ecel1/Pappa/Adamts8	3
CST<WT	MF	GO:0035254	glutamate receptor binding	2/123	67/13889	0.118787029140984	0.366690394304778	0.31640297922221	Grin2b/Shisa7	2
WT<CST	BP	GO:0006813	potassium ion transport	4/131	200/13966	0.118941137814353	0.489968888994605	0.45999924144586	Kcnip3/Slc12a4/Kcng4/Adcyap1	4
CST<WT	BP	GO:1990845	adaptive thermogenesis	3/127	132/13966	0.118955288849712	0.367636819014488	0.313572817162081	Ksr2/Nova2/Igf1r	3
CST<WT	CC	GO:0000974	Prp19 complex	1/129	14/14212	0.119895506772647	0.318299623857697	0.250980087951496	Polr2a	1
CST<WT	CC	GO:0098691	dopaminergic synapse	1/129	14/14212	0.119895506772647	0.318299623857697	0.250980087951496	Chrna4	1
CST<WT	BP	GO:0001886	endothelial cell morphogenesis	1/127	14/13966	0.120103850794687	0.367636819014488	0.313572817162081	Met	1
CST<WT	BP	GO:0002031	G protein-coupled receptor internalization	1/127	14/13966	0.120103850794687	0.367636819014488	0.313572817162081	Ubqln2	1
CST<WT	BP	GO:0003414	chondrocyte morphogenesis involved in endochondral bone morphogenesis	1/127	14/13966	0.120103850794687	0.367636819014488	0.313572817162081	Matn2	1
CST<WT	BP	GO:0003429	growth plate cartilage chondrocyte morphogenesis	1/127	14/13966	0.120103850794687	0.367636819014488	0.313572817162081	Matn2	1
CST<WT	BP	GO:0006828	manganese ion transport	1/127	14/13966	0.120103850794687	0.367636819014488	0.313572817162081	Ryr2	1
CST<WT	BP	GO:0007288	sperm axoneme assembly	1/127	14/13966	0.120103850794687	0.367636819014488	0.313572817162081	Pla2g3	1
CST<WT	BP	GO:0009309	amine biosynthetic process	1/127	14/13966	0.120103850794687	0.367636819014488	0.313572817162081	Moxd1	1
CST<WT	BP	GO:0010421	hydrogen peroxide-mediated programmed cell death	1/127	14/13966	0.120103850794687	0.367636819014488	0.313572817162081	Met	1
CST<WT	BP	GO:0010644	cell communication by electrical coupling	1/127	14/13966	0.120103850794687	0.367636819014488	0.313572817162081	Ank3	1
CST<WT	BP	GO:0010880	regulation of release of sequestered calcium ion into cytosol by sarcoplasmic reticulum	1/127	14/13966	0.120103850794687	0.367636819014488	0.313572817162081	Ryr2	1
CST<WT	BP	GO:0019081	viral translation	1/127	14/13966	0.120103850794687	0.367636819014488	0.313572817162081	Pcbp2	1
CST<WT	BP	GO:0019886	antigen processing and presentation of exogenous peptide antigen via MHC class II	1/127	14/13966	0.120103850794687	0.367636819014488	0.313572817162081	Fcer1g	1
CST<WT	BP	GO:0021692	cerebellar Purkinje cell layer morphogenesis	1/127	14/13966	0.120103850794687	0.367636819014488	0.313572817162081	Faim2	1
CST<WT	BP	GO:0021932	hindbrain radial glia guided cell migration	1/127	14/13966	0.120103850794687	0.367636819014488	0.313572817162081	Rere	1
CST<WT	BP	GO:0030033	microvillus assembly	1/127	14/13966	0.120103850794687	0.367636819014488	0.313572817162081	Rapgef2	1
CST<WT	BP	GO:0030949	positive regulation of vascular endothelial growth factor receptor signaling pathway	1/127	14/13966	0.120103850794687	0.367636819014488	0.313572817162081	Fgf10	1
CST<WT	BP	GO:0032438	melanosome organization	1/127	14/13966	0.120103850794687	0.367636819014488	0.313572817162081	Lyst	1
CST<WT	BP	GO:0032793	positive regulation of CREB transcription factor activity	1/127	14/13966	0.120103850794687	0.367636819014488	0.313572817162081	Epha5	1
CST<WT	BP	GO:0033008	positive regulation of mast cell activation involved in immune response	1/127	14/13966	0.120103850794687	0.367636819014488	0.313572817162081	Fcer1g	1
CST<WT	BP	GO:0034315	regulation of Arp2/3 complex-mediated actin nucleation	1/127	14/13966	0.120103850794687	0.367636819014488	0.313572817162081	Wasf1	1
CST<WT	BP	GO:0042119	neutrophil activation	1/127	14/13966	0.120103850794687	0.367636819014488	0.313572817162081	Fcer1g	1
CST<WT	BP	GO:0042401	cellular biogenic amine biosynthetic process	1/127	14/13966	0.120103850794687	0.367636819014488	0.313572817162081	Moxd1	1
CST<WT	BP	GO:0042711	maternal behavior	1/127	14/13966	0.120103850794687	0.367636819014488	0.313572817162081	Gnaq	1
CST<WT	BP	GO:0043306	positive regulation of mast cell degranulation	1/127	14/13966	0.120103850794687	0.367636819014488	0.313572817162081	Fcer1g	1
CST<WT	BP	GO:0048308	organelle inheritance	1/127	14/13966	0.120103850794687	0.367636819014488	0.313572817162081	Mapk1	1
CST<WT	BP	GO:0048313	Golgi inheritance	1/127	14/13966	0.120103850794687	0.367636819014488	0.313572817162081	Mapk1	1
CST<WT	BP	GO:0051547	regulation of keratinocyte migration	1/127	14/13966	0.120103850794687	0.367636819014488	0.313572817162081	Fgf10	1
CST<WT	BP	GO:0060019	radial glial cell differentiation	1/127	14/13966	0.120103850794687	0.367636819014488	0.313572817162081	Fgf10	1
CST<WT	BP	GO:0071625	vocalization behavior	1/127	14/13966	0.120103850794687	0.367636819014488	0.313572817162081	Cntnap2	1
CST<WT	BP	GO:0072215	regulation of metanephros development	1/127	14/13966	0.120103850794687	0.367636819014488	0.313572817162081	Agtr2	1
CST<WT	BP	GO:0090171	chondrocyte morphogenesis	1/127	14/13966	0.120103850794687	0.367636819014488	0.313572817162081	Matn2	1
CST<WT	BP	GO:0097050	type B pancreatic cell apoptotic process	1/127	14/13966	0.120103850794687	0.367636819014488	0.313572817162081	Ryr2	1
CST<WT	BP	GO:0097186	amelogenesis	1/127	14/13966	0.120103850794687	0.367636819014488	0.313572817162081	Slc24a4	1
CST<WT	BP	GO:0097284	hepatocyte apoptotic process	1/127	14/13966	0.120103850794687	0.367636819014488	0.313572817162081	Igf1r	1
CST<WT	BP	GO:0097468	programmed cell death in response to reactive oxygen species	1/127	14/13966	0.120103850794687	0.367636819014488	0.313572817162081	Met	1
CST<WT	BP	GO:0099151	regulation of postsynaptic density assembly	1/127	14/13966	0.120103850794687	0.367636819014488	0.313572817162081	Ntrk3	1
CST<WT	BP	GO:0106070	regulation of adenylate cyclase-activating G protein-coupled receptor signaling pathway	1/127	14/13966	0.120103850794687	0.367636819014488	0.313572817162081	Atp2b4	1
CST<WT	BP	GO:1901160	primary amino compound metabolic process	1/127	14/13966	0.120103850794687	0.367636819014488	0.313572817162081	Htr1a	1
CST<WT	BP	GO:1901881	positive regulation of protein depolymerization	1/127	14/13966	0.120103850794687	0.367636819014488	0.313572817162081	Htr1a	1
CST<WT	BP	GO:1903779	regulation of cardiac conduction	1/127	14/13966	0.120103850794687	0.367636819014488	0.313572817162081	Ryr2	1
CST<WT	BP	GO:2000678	negative regulation of transcription regulatory region DNA binding	1/127	14/13966	0.120103850794687	0.367636819014488	0.313572817162081	Sox11	1
CST<WT	CC	GO:0000139	Golgi membrane	4/129	208/14212	0.120977347813073	0.318299623857697	0.250980087951496	B3galt1/Caln1/Nsg2/Zdhhc9	4
CST<WT	BP	GO:0000380	alternative mRNA splicing, via spliceosome	2/127	66/13966	0.12103101168846	0.368135993885731	0.313998584284786	Celf2/Celf1	2
CST<WT	BP	GO:0021872	forebrain generation of neurons	2/127	66/13966	0.12103101168846	0.368135993885731	0.313998584284786	Rapgef2/Gnaq	2
CST<WT	BP	GO:0032755	positive regulation of interleukin-6 production	2/127	66/13966	0.12103101168846	0.368135993885731	0.313998584284786	Fcer1g/Vegfd	2
CST<WT	BP	GO:0043279	response to alkaloid	2/127	66/13966	0.12103101168846	0.368135993885731	0.313998584284786	Prkcg/Ryr2	2
CST<WT	BP	GO:0050764	regulation of phagocytosis	2/127	66/13966	0.12103101168846	0.368135993885731	0.313998584284786	Fcer1g/Prkcg	2
WT<CST	BP	GO:0006333	chromatin assembly or disassembly	3/131	129/13966	0.121061488583014	0.489968888994605	0.45999924144586	Hist1h4k/Hist1h1e/Hist1h1c	3
WT<CST	BP	GO:2001057	reactive nitrogen species metabolic process	2/131	64/13966	0.121068607334018	0.489968888994605	0.45999924144586	Ddah1/Gla	2
CST<WT	BP	GO:0030072	peptide hormone secretion	4/127	208/13966	0.12154248927475	0.36922554434158	0.31492790743255	Cacna1e/Pclo/Epha5/Gpr68	4
WT<CST	BP	GO:0055074	calcium ion homeostasis	6/131	359/13966	0.121737426914175	0.489968888994605	0.45999924144586	Bok/Hcrtr1/Hcrtr2/Ramp3/Chga/Adcyap1	6
WT<CST	BP	GO:0009306	protein secretion	7/131	442/13966	0.122086643593956	0.489968888994605	0.45999924144586	Crlf2/Vgf/Anxa4/Pde4c/Chga/H2-T23/Adcyap1	7
WT<CST	CC	GO:0016529	sarcoplasmic reticulum	2/134	64/14212	0.122104186614381	0.564876436029751	0.537977558123572	Rtn2/Ank1	2
WT<CST	BP	GO:0071248	cellular response to metal ion	3/131	130/13966	0.123118273088783	0.489968888994605	0.45999924144586	Syt2/Crhbp/Syt12	3
WT<CST	MF	GO:0015929	hexosaminidase activity	1/130	14/13889	0.123411849220115	0.414006857148708	0.377972535226891	Chil3	1
WT<CST	MF	GO:0016595	glutamate binding	1/130	14/13889	0.123411849220115	0.414006857148708	0.377972535226891	Gad1	1
WT<CST	MF	GO:0034483	heparan sulfate sulfotransferase activity	1/130	14/13889	0.123411849220115	0.414006857148708	0.377972535226891	Hs3st2	1
CST<WT	BP	GO:0050678	regulation of epithelial cell proliferation	5/127	289/13966	0.123584959732765	0.373637727396982	0.318691242873832	Foxp2/Sox11/Fgf10/Ar/Vegfd	5
WT<CST	BP	GO:0001886	endothelial cell morphogenesis	1/131	14/13966	0.123659367026081	0.489968888994605	0.45999924144586	Tnmd	1
WT<CST	BP	GO:0002031	G protein-coupled receptor internalization	1/131	14/13966	0.123659367026081	0.489968888994605	0.45999924144586	Apln	1
WT<CST	BP	GO:0003198	epithelial to mesenchymal transition involved in endocardial cushion formation	1/131	14/13966	0.123659367026081	0.489968888994605	0.45999924144586	Tmem100	1
WT<CST	BP	GO:0003414	chondrocyte morphogenesis involved in endochondral bone morphogenesis	1/131	14/13966	0.123659367026081	0.489968888994605	0.45999924144586	Vwa1	1
WT<CST	BP	GO:0003429	growth plate cartilage chondrocyte morphogenesis	1/131	14/13966	0.123659367026081	0.489968888994605	0.45999924144586	Vwa1	1
WT<CST	BP	GO:0010984	regulation of lipoprotein particle clearance	1/131	14/13966	0.123659367026081	0.489968888994605	0.45999924144586	Lipg	1
WT<CST	BP	GO:0030033	microvillus assembly	1/131	14/13966	0.123659367026081	0.489968888994605	0.45999924144586	Rap1gap	1
WT<CST	BP	GO:0034368	protein-lipid complex remodeling	1/131	14/13966	0.123659367026081	0.489968888994605	0.45999924144586	Lipg	1
WT<CST	BP	GO:0034369	plasma lipoprotein particle remodeling	1/131	14/13966	0.123659367026081	0.489968888994605	0.45999924144586	Lipg	1
WT<CST	BP	GO:0042559	pteridine-containing compound biosynthetic process	1/131	14/13966	0.123659367026081	0.489968888994605	0.45999924144586	Mthfd1l	1
WT<CST	BP	GO:0042921	glucocorticoid receptor signaling pathway	1/131	14/13966	0.123659367026081	0.489968888994605	0.45999924144586	Bdnf	1
WT<CST	BP	GO:0045019	negative regulation of nitric oxide biosynthetic process	1/131	14/13966	0.123659367026081	0.489968888994605	0.45999924144586	Gla	1
WT<CST	BP	GO:0046514	ceramide catabolic process	1/131	14/13966	0.123659367026081	0.489968888994605	0.45999924144586	Gla	1
WT<CST	BP	GO:0050930	induction of positive chemotaxis	1/131	14/13966	0.123659367026081	0.489968888994605	0.45999924144586	Scg2	1
WT<CST	BP	GO:0051547	regulation of keratinocyte migration	1/131	14/13966	0.123659367026081	0.489968888994605	0.45999924144586	Serpine1	1
WT<CST	BP	GO:0060294	cilium movement involved in cell motility	1/131	14/13966	0.123659367026081	0.489968888994605	0.45999924144586	Tekt5	1
WT<CST	BP	GO:0071625	vocalization behavior	1/131	14/13966	0.123659367026081	0.489968888994605	0.45999924144586	Srpx2	1
WT<CST	BP	GO:0071677	positive regulation of mononuclear cell migration	1/131	14/13966	0.123659367026081	0.489968888994605	0.45999924144586	Serpine1	1
WT<CST	BP	GO:0072677	eosinophil migration	1/131	14/13966	0.123659367026081	0.489968888994605	0.45999924144586	Scg2	1
WT<CST	BP	GO:0090171	chondrocyte morphogenesis	1/131	14/13966	0.123659367026081	0.489968888994605	0.45999924144586	Vwa1	1
WT<CST	BP	GO:1900119	positive regulation of execution phase of apoptosis	1/131	14/13966	0.123659367026081	0.489968888994605	0.45999924144586	Bok	1
WT<CST	BP	GO:1904406	negative regulation of nitric oxide metabolic process	1/131	14/13966	0.123659367026081	0.489968888994605	0.45999924144586	Gla	1
WT<CST	BP	GO:2000810	regulation of bicellular tight junction assembly	1/131	14/13966	0.123659367026081	0.489968888994605	0.45999924144586	Myo1c	1
CST<WT	CC	GO:0043198	dendritic shaft	2/129	67/14212	0.123680070225634	0.322281721453334	0.254119982346191	Grm5/Sez6	2
WT<CST	BP	GO:0048705	skeletal system morphogenesis	4/131	203/13966	0.123722773314493	0.489968888994605	0.45999924144586	Col27a1/Vwa1/Mthfd1l/Col11a2	4
CST<WT	BP	GO:0007589	body fluid secretion	2/127	67/13966	0.124045305608107	0.373637727396982	0.318691242873832	Chrm3/Fgf10	2
WT<CST	BP	GO:0031960	response to corticosteroid	2/131	65/13966	0.124178754630453	0.489968888994605	0.45999924144586	Pappa/Adcyap1	2
WT<CST	BP	GO:0060350	endochondral bone morphogenesis	2/131	65/13966	0.124178754630453	0.489968888994605	0.45999924144586	Col27a1/Vwa1	2
WT<CST	BP	GO:0061180	mammary gland epithelium development	2/131	65/13966	0.124178754630453	0.489968888994605	0.45999924144586	Ccnd1/Gpx1	2
WT<CST	BP	GO:0098659	inorganic cation import across plasma membrane	2/131	65/13966	0.124178754630453	0.489968888994605	0.45999924144586	Slc12a4/Ramp3	2
WT<CST	BP	GO:0099587	inorganic ion import across plasma membrane	2/131	65/13966	0.124178754630453	0.489968888994605	0.45999924144586	Slc12a4/Ramp3	2
WT<CST	CC	GO:0016471	vacuolar proton-transporting V-type ATPase complex	1/134	14/14212	0.124262024139351	0.564876436029751	0.537977558123572	Atp6v0c	1
WT<CST	CC	GO:0043196	varicosity	1/134	14/14212	0.124262024139351	0.564876436029751	0.537977558123572	Crhbp	1
WT<CST	CC	GO:0071437	invadopodium	1/134	14/14212	0.124262024139351	0.564876436029751	0.537977558123572	Nox1	1
WT<CST	CC	GO:0098644	complex of collagen trimers	1/134	14/14212	0.124262024139351	0.564876436029751	0.537977558123572	Col27a1	1
WT<CST	MF	GO:0000982	transcription factor activity, RNA polymerase II proximal promoter sequence-specific DNA binding	6/130	362/13889	0.124324112190826	0.414006857148708	0.377972535226891	Creb3l1/Kcnip3/Mitf/Klf1/Irf4/Hmga1	6
WT<CST	MF	GO:0015079	potassium ion transmembrane transporter activity	3/130	131/13889	0.124604005549611	0.414006857148708	0.377972535226891	Kcnip3/Slc12a4/Kcng4	3
WT<CST	BP	GO:0070371	ERK1 and ERK2 cascade	5/131	281/13966	0.124731288241355	0.491160755504612	0.461118205736904	Hcrtr1/Dusp4/Ramp3/Alkal2/Adcyap1	5
CST<WT	BP	GO:0060537	muscle tissue development	6/127	373/13966	0.124736587144432	0.373637727396982	0.318691242873832	Foxp2/Met/Hlf/Sox11/Ryr2/Agtr2	6
CST<WT	MF	GO:0004697	protein kinase C activity	1/123	15/13889	0.124970986704853	0.369705835668524	0.31900488711502	Prkcg	1
CST<WT	MF	GO:0005184	neuropeptide hormone activity	1/123	15/13889	0.124970986704853	0.369705835668524	0.31900488711502	Grp	1
CST<WT	MF	GO:0005237	inhibitory extracellular ligand-gated ion channel activity	1/123	15/13889	0.124970986704853	0.369705835668524	0.31900488711502	Glra3	1
CST<WT	MF	GO:0022884	macromolecule transmembrane transporter activity	1/123	15/13889	0.124970986704853	0.369705835668524	0.31900488711502	Hnrnpa3	1
CST<WT	MF	GO:0034236	protein kinase A catalytic subunit binding	1/123	15/13889	0.124970986704853	0.369705835668524	0.31900488711502	Ryr2	1
WT<CST	BP	GO:0060326	cell chemotaxis	4/131	204/13966	0.125334805870398	0.492144947160589	0.462042197903256	Scg2/Serpine1/Itga9/Chga	4
CST<WT	BP	GO:0051052	regulation of DNA metabolic process	6/127	374/13966	0.125880725173311	0.373637727396982	0.318691242873832	Met/Prkcg/Igf1r/Rnf169/Fgf10/Mapk1	6
CST<WT	CC	GO:0030133	transport vesicle	5/129	292/14212	0.126850821043077	0.323913252739668	0.255406449043126	Pclo/Grin2b/Npy1r/Syt1/Syt4	5
CST<WT	BP	GO:0003151	outflow tract morphogenesis	2/127	68/13966	0.127077750996698	0.373637727396982	0.318691242873832	Npy1r/Sox11	2
CST<WT	BP	GO:0071277	cellular response to calcium ion	2/127	68/13966	0.127077750996698	0.373637727396982	0.318691242873832	Syt1/Syt4	2
WT<CST	BP	GO:1990845	adaptive thermogenesis	3/131	132/13966	0.127270108640877	0.492144947160589	0.462042197903256	Ache/Irf4/Adcyap1	3
WT<CST	BP	GO:1905897	regulation of response to endoplasmic reticulum stress	2/131	66/13966	0.127308185130983	0.492144947160589	0.462042197903256	Bok/Creb3l1	2
WT<CST	BP	GO:1905114	cell surface receptor signaling pathway involved in cell-cell signaling	7/131	447/13966	0.127357374456175	0.492144947160589	0.462042197903256	Bdnf/Mitf/Ccnd1/Insyn1/Tmem108/Atp6v0c/Lzts2	7
CST<WT	BP	GO:0001654	eye development	5/127	292/13966	0.127523422866068	0.373637727396982	0.318691242873832	Pds5b/Foxp2/Ntrk3/Sox11/Fgf10	5
CST<WT	BP	GO:0048880	sensory system development	5/127	292/13966	0.127523422866068	0.373637727396982	0.318691242873832	Pds5b/Foxp2/Ntrk3/Sox11/Fgf10	5
CST<WT	BP	GO:0150063	visual system development	5/127	292/13966	0.127523422866068	0.373637727396982	0.318691242873832	Pds5b/Foxp2/Ntrk3/Sox11/Fgf10	5
WT<CST	BP	GO:2001233	regulation of apoptotic signaling pathway	6/131	364/13966	0.127622643967726	0.492144947160589	0.462042197903256	Scg2/Bok/Creb3l1/Serpine1/Gpx1/Nox1	6
CST<WT	CC	GO:0005665	RNA polymerase II, core complex	1/129	15/14212	0.127891948498688	0.323913252739668	0.255406449043126	Polr2a	1
CST<WT	CC	GO:0032580	Golgi cisterna membrane	1/129	15/14212	0.127891948498688	0.323913252739668	0.255406449043126	Nsg2	1
CST<WT	BP	GO:0003422	growth plate cartilage morphogenesis	1/127	15/13966	0.128113226579455	0.373637727396982	0.318691242873832	Matn2	1
CST<WT	BP	GO:0006582	melanin metabolic process	1/127	15/13966	0.128113226579455	0.373637727396982	0.318691242873832	Rapgef2	1
CST<WT	BP	GO:0006677	glycosylceramide metabolic process	1/127	15/13966	0.128113226579455	0.373637727396982	0.318691242873832	B3galt1	1
CST<WT	BP	GO:0021681	cerebellar granular layer development	1/127	15/13966	0.128113226579455	0.373637727396982	0.318691242873832	Faim2	1
CST<WT	BP	GO:0033033	negative regulation of myeloid cell apoptotic process	1/127	15/13966	0.128113226579455	0.373637727396982	0.318691242873832	Fcer1g	1
CST<WT	BP	GO:0035235	ionotropic glutamate receptor signaling pathway	1/127	15/13966	0.128113226579455	0.373637727396982	0.318691242873832	Grin2b	1
CST<WT	BP	GO:0042415	norepinephrine metabolic process	1/127	15/13966	0.128113226579455	0.373637727396982	0.318691242873832	Moxd1	1
CST<WT	BP	GO:0045725	positive regulation of glycogen biosynthetic process	1/127	15/13966	0.128113226579455	0.373637727396982	0.318691242873832	Dyrk2	1
CST<WT	BP	GO:0046886	positive regulation of hormone biosynthetic process	1/127	15/13966	0.128113226579455	0.373637727396982	0.318691242873832	Igf1r	1
CST<WT	BP	GO:0048070	regulation of developmental pigmentation	1/127	15/13966	0.128113226579455	0.373637727396982	0.318691242873832	Gnaq	1
CST<WT	BP	GO:0048753	pigment granule organization	1/127	15/13966	0.128113226579455	0.373637727396982	0.318691242873832	Lyst	1
CST<WT	BP	GO:0051000	positive regulation of nitric-oxide synthase activity	1/127	15/13966	0.128113226579455	0.373637727396982	0.318691242873832	Agtr2	1
CST<WT	BP	GO:0051450	myoblast proliferation	1/127	15/13966	0.128113226579455	0.373637727396982	0.318691242873832	Met	1
CST<WT	BP	GO:0060253	negative regulation of glial cell proliferation	1/127	15/13966	0.128113226579455	0.373637727396982	0.318691242873832	Sox11	1
CST<WT	BP	GO:0060746	parental behavior	1/127	15/13966	0.128113226579455	0.373637727396982	0.318691242873832	Gnaq	1
CST<WT	BP	GO:0071243	cellular response to arsenic-containing substance	1/127	15/13966	0.128113226579455	0.373637727396982	0.318691242873832	Cpeb2	1
CST<WT	BP	GO:0071404	cellular response to low-density lipoprotein particle stimulus	1/127	15/13966	0.128113226579455	0.373637727396982	0.318691242873832	Fcer1g	1
CST<WT	BP	GO:0097242	amyloid-beta clearance	1/127	15/13966	0.128113226579455	0.373637727396982	0.318691242873832	Igf1r	1
CST<WT	BP	GO:0098917	retrograde trans-synaptic signaling	1/127	15/13966	0.128113226579455	0.373637727396982	0.318691242873832	Syt4	1
CST<WT	BP	GO:1900037	regulation of cellular response to hypoxia	1/127	15/13966	0.128113226579455	0.373637727396982	0.318691242873832	Cd34	1
CST<WT	BP	GO:1903358	regulation of Golgi organization	1/127	15/13966	0.128113226579455	0.373637727396982	0.318691242873832	Mapk1	1
CST<WT	BP	GO:2000369	regulation of clathrin-dependent endocytosis	1/127	15/13966	0.128113226579455	0.373637727396982	0.318691242873832	Ubqln2	1
CST<WT	BP	GO:2000651	positive regulation of sodium ion transmembrane transporter activity	1/127	15/13966	0.128113226579455	0.373637727396982	0.318691242873832	Ank3	1
CST<WT	BP	GO:2000846	regulation of corticosteroid hormone secretion	1/127	15/13966	0.128113226579455	0.373637727396982	0.318691242873832	Agtr2	1
CST<WT	BP	GO:0043271	negative regulation of ion transport	3/127	137/13966	0.128978981581363	0.375707819382713	0.320456910897754	Ank3/Gnaq/Agtr2	3
WT<CST	BP	GO:0016079	synaptic vesicle exocytosis	3/131	133/13966	0.12936481951277	0.492144947160589	0.462042197903256	Syt2/Cadps2/Syt12	3
CST<WT	BP	GO:0022600	digestive system process	2/127	69/13966	0.130127775571178	0.378596390520491	0.322920694018483	Chrm3/Fgf10	2
WT<CST	BP	GO:0008625	extrinsic apoptotic signaling pathway via death domain receptors	2/131	67/13966	0.130456270985885	0.492144947160589	0.462042197903256	Serpine1/Gpx1	2
WT<CST	BP	GO:1903201	regulation of oxidative stress-induced cell death	2/131	67/13966	0.130456270985885	0.492144947160589	0.462042197903256	Gpx1/Nox1	2
CST<WT	BP	GO:0002791	regulation of peptide secretion	6/127	378/13966	0.130508883357156	0.378655669215079	0.322971255296076	Cacna1e/Cd34/Epha5/Gpr68/Syt4/Agtr2	6
CST<WT	CC	GO:0031256	leading edge membrane	3/129	138/14212	0.130516395990725	0.327186139283856	0.257987128664295	Cntnap2/Shisa7/Psd3	3
CST<WT	MF	GO:0019905	syntaxin binding	2/123	71/13889	0.130576430319351	0.379989021907621	0.327877851371735	Syt1/Syt4	2
CST<WT	BP	GO:0034767	positive regulation of ion transmembrane transport	3/127	138/13966	0.131019121392624	0.378655669215079	0.322971255296076	Cacnb2/Ank3/Ryr2	3
WT<CST	BP	GO:0072503	cellular divalent inorganic cation homeostasis	6/131	367/13966	0.131219659941984	0.492144947160589	0.462042197903256	Bok/Hcrtr1/Hcrtr2/Ramp3/Chga/Adcyap1	6
CST<WT	MF	GO:0003729	mRNA binding	4/123	220/13889	0.131350593300501	0.379989021907621	0.327877851371735	Celf2/Hnrnpa3/Celf1/Cpeb2	4
WT<CST	MF	GO:0003688	DNA replication origin binding	1/130	15/13889	0.131624927389585	0.427385386859816	0.39018662469232	Mcm5	1
WT<CST	MF	GO:0008553	proton-exporting ATPase activity, phosphorylative mechanism	1/130	15/13889	0.131624927389585	0.427385386859816	0.39018662469232	Atp6v0c	1
WT<CST	BP	GO:0001911	negative regulation of leukocyte mediated cytotoxicity	1/131	15/13966	0.131887622682588	0.492144947160589	0.462042197903256	H2-T23	1
WT<CST	BP	GO:0002360	T cell lineage commitment	1/131	15/13966	0.131887622682588	0.492144947160589	0.462042197903256	Irf4	1
WT<CST	BP	GO:0003422	growth plate cartilage morphogenesis	1/131	15/13966	0.131887622682588	0.492144947160589	0.462042197903256	Vwa1	1
WT<CST	BP	GO:0006677	glycosylceramide metabolic process	1/131	15/13966	0.131887622682588	0.492144947160589	0.462042197903256	Gla	1
WT<CST	BP	GO:0035641	locomotory exploration behavior	1/131	15/13966	0.131887622682588	0.492144947160589	0.462042197903256	Gad1	1
WT<CST	BP	GO:0040034	regulation of development, heterochronic	1/131	15/13966	0.131887622682588	0.492144947160589	0.462042197903256	Gdpd5	1
WT<CST	BP	GO:0042094	interleukin-2 biosynthetic process	1/131	15/13966	0.131887622682588	0.492144947160589	0.462042197903256	Irf4	1
WT<CST	BP	GO:0043586	tongue development	1/131	15/13966	0.131887622682588	0.492144947160589	0.462042197903256	Bdnf	1
WT<CST	BP	GO:0051450	myoblast proliferation	1/131	15/13966	0.131887622682588	0.492144947160589	0.462042197903256	Gpx1	1
WT<CST	BP	GO:0051608	histamine transport	1/131	15/13966	0.131887622682588	0.492144947160589	0.462042197903256	Adcyap1	1
WT<CST	BP	GO:0061179	negative regulation of insulin secretion involved in cellular response to glucose stimulus	1/131	15/13966	0.131887622682588	0.492144947160589	0.462042197903256	Pde4c	1
WT<CST	BP	GO:0072606	interleukin-8 secretion	1/131	15/13966	0.131887622682588	0.492144947160589	0.462042197903256	Anxa4	1
WT<CST	BP	GO:0098917	retrograde trans-synaptic signaling	1/131	15/13966	0.131887622682588	0.492144947160589	0.462042197903256	Bdnf	1
WT<CST	BP	GO:0098962	regulation of postsynaptic neurotransmitter receptor activity	1/131	15/13966	0.131887622682588	0.492144947160589	0.462042197903256	Nptx2	1
WT<CST	BP	GO:1900037	regulation of cellular response to hypoxia	1/131	15/13966	0.131887622682588	0.492144947160589	0.462042197903256	Ddah1	1
WT<CST	CC	GO:0008021	synaptic vesicle	4/134	207/14212	0.132023604116598	0.564876436029751	0.537977558123572	Syt2/Bdnf/Sphk1/Kif3c	4
CST<WT	CC	GO:0031514	motile cilium	3/129	139/14212	0.1325613288946	0.327186139283856	0.257987128664295	Atp2b4/Met/Dync2h1	3
CST<WT	MF	GO:0005086	ARF guanyl-nucleotide exchange factor activity	1/123	16/13889	0.132728559764915	0.379989021907621	0.327877851371735	Psd3	1
CST<WT	MF	GO:0016646	oxidoreductase activity, acting on the CH-NH group of donors, NAD or NADP as acceptor	1/123	16/13889	0.132728559764915	0.379989021907621	0.327877851371735	Crym	1
WT<CST	MF	GO:0008509	anion transmembrane transporter activity	4/130	209/13889	0.1327799260147	0.427385386859816	0.39018662469232	Slc7a10/Slc5a5/Slc12a4/Slc38a3	4
CST<WT	CC	GO:0008076	voltage-gated potassium channel complex	2/129	70/14212	0.132806181997137	0.327186139283856	0.257987128664295	Nos1ap/Cntnap2	2
CST<WT	BP	GO:0001558	regulation of cell growth	6/127	380/13966	0.13285365380606	0.378655669215079	0.322971255296076	Ntrk3/Syt1/Dpysl2/Crim1/Syt4/Fhl1	6
CST<WT	BP	GO:0032507	maintenance of protein location in cell	2/127	70/13966	0.133194815804514	0.378655669215079	0.322971255296076	Ank3/Vps13a	2
WT<CST	BP	GO:0002274	myeloid leukocyte activation	3/131	135/13966	0.133590975261404	0.492144947160589	0.462042197903256	Crlf2/Chga/Irf4	3
WT<CST	BP	GO:0045807	positive regulation of endocytosis	3/131	135/13966	0.133590975261404	0.492144947160589	0.462042197903256	Rap1gap/Serpine1/Apln	3
WT<CST	BP	GO:0009063	cellular amino acid catabolic process	2/131	68/13966	0.133622394261457	0.492144947160589	0.462042197903256	Ddah1/Amt	2
CST<WT	BP	GO:0009410	response to xenobiotic stimulus	3/127	140/13966	0.135133560890737	0.378655669215079	0.322971255296076	Prkcg/Ryr2/Agtr2	3
WT<CST	BP	GO:0031644	regulation of neurological system process	3/131	136/13966	0.135722078729328	0.492144947160589	0.462042197903256	Nptx2/Tmem108/Tmem100	3
CST<WT	BP	GO:0003214	cardiac left ventricle morphogenesis	1/127	16/13966	0.136050264800687	0.378655669215079	0.322971255296076	Ryr2	1
CST<WT	BP	GO:0006359	regulation of transcription by RNA polymerase III	1/127	16/13966	0.136050264800687	0.378655669215079	0.322971255296076	Ar	1
CST<WT	BP	GO:0006688	glycosphingolipid biosynthetic process	1/127	16/13966	0.136050264800687	0.378655669215079	0.322971255296076	B3galt1	1
CST<WT	BP	GO:0006883	cellular sodium ion homeostasis	1/127	16/13966	0.136050264800687	0.378655669215079	0.322971255296076	Agtr2	1
CST<WT	BP	GO:0010801	negative regulation of peptidyl-threonine phosphorylation	1/127	16/13966	0.136050264800687	0.378655669215079	0.322971255296076	Met	1
CST<WT	BP	GO:0014061	regulation of norepinephrine secretion	1/127	16/13966	0.136050264800687	0.378655669215079	0.322971255296076	Agtr2	1
CST<WT	BP	GO:0014808	release of sequestered calcium ion into cytosol by sarcoplasmic reticulum	1/127	16/13966	0.136050264800687	0.378655669215079	0.322971255296076	Ryr2	1
CST<WT	BP	GO:0032303	regulation of icosanoid secretion	1/127	16/13966	0.136050264800687	0.378655669215079	0.322971255296076	Agtr2	1
CST<WT	BP	GO:0033160	positive regulation of protein import into nucleus, translocation	1/127	16/13966	0.136050264800687	0.378655669215079	0.322971255296076	Mapk1	1
CST<WT	BP	GO:0033561	regulation of water loss via skin	1/127	16/13966	0.136050264800687	0.378655669215079	0.322971255296076	Met	1
CST<WT	BP	GO:0035930	corticosteroid hormone secretion	1/127	16/13966	0.136050264800687	0.378655669215079	0.322971255296076	Agtr2	1
CST<WT	BP	GO:0035994	response to muscle stretch	1/127	16/13966	0.136050264800687	0.378655669215079	0.322971255296076	Ryr2	1
CST<WT	BP	GO:0043278	response to morphine	1/127	16/13966	0.136050264800687	0.378655669215079	0.322971255296076	Prkcg	1
CST<WT	BP	GO:0043567	regulation of insulin-like growth factor receptor signaling pathway	1/127	16/13966	0.136050264800687	0.378655669215079	0.322971255296076	Ar	1
CST<WT	BP	GO:0048243	norepinephrine secretion	1/127	16/13966	0.136050264800687	0.378655669215079	0.322971255296076	Agtr2	1
CST<WT	BP	GO:0048261	negative regulation of receptor-mediated endocytosis	1/127	16/13966	0.136050264800687	0.378655669215079	0.322971255296076	Ubqln2	1
CST<WT	BP	GO:0048665	neuron fate specification	1/127	16/13966	0.136050264800687	0.378655669215079	0.322971255296076	Ntrk3	1
CST<WT	BP	GO:0048712	negative regulation of astrocyte differentiation	1/127	16/13966	0.136050264800687	0.378655669215079	0.322971255296076	Ntrk3	1
CST<WT	BP	GO:0050966	detection of mechanical stimulus involved in sensory perception of pain	1/127	16/13966	0.136050264800687	0.378655669215079	0.322971255296076	Grin2b	1
CST<WT	BP	GO:0051546	keratinocyte migration	1/127	16/13966	0.136050264800687	0.378655669215079	0.322971255296076	Fgf10	1
CST<WT	BP	GO:0061081	positive regulation of myeloid leukocyte cytokine production involved in immune response	1/127	16/13966	0.136050264800687	0.378655669215079	0.322971255296076	Fcer1g	1
CST<WT	BP	GO:0071467	cellular response to pH	1/127	16/13966	0.136050264800687	0.378655669215079	0.322971255296076	Gpr68	1
CST<WT	BP	GO:0072673	lamellipodium morphogenesis	1/127	16/13966	0.136050264800687	0.378655669215079	0.322971255296076	Wasf1	1
CST<WT	BP	GO:0090030	regulation of steroid hormone biosynthetic process	1/127	16/13966	0.136050264800687	0.378655669215079	0.322971255296076	Igf1r	1
CST<WT	BP	GO:0098885	modification of postsynaptic actin cytoskeleton	1/127	16/13966	0.136050264800687	0.378655669215079	0.322971255296076	Wasf1	1
CST<WT	BP	GO:1902259	regulation of delayed rectifier potassium channel activity	1/127	16/13966	0.136050264800687	0.378655669215079	0.322971255296076	Ank3	1
CST<WT	BP	GO:1903514	release of sequestered calcium ion into cytosol by endoplasmic reticulum	1/127	16/13966	0.136050264800687	0.378655669215079	0.322971255296076	Ryr2	1
CST<WT	BP	GO:1904262	negative regulation of TORC1 signaling	1/127	16/13966	0.136050264800687	0.378655669215079	0.322971255296076	Rnf152	1
CST<WT	BP	GO:1904355	positive regulation of telomere capping	1/127	16/13966	0.136050264800687	0.378655669215079	0.322971255296076	Mapk1	1
CST<WT	BP	GO:1904889	regulation of excitatory synapse assembly	1/127	16/13966	0.136050264800687	0.378655669215079	0.322971255296076	Ntrk3	1
CST<WT	BP	GO:2000251	positive regulation of actin cytoskeleton reorganization	1/127	16/13966	0.136050264800687	0.378655669215079	0.322971255296076	Ntrk3	1
CST<WT	BP	GO:0050805	negative regulation of synaptic transmission	2/127	71/13966	0.136278316815888	0.378655669215079	0.322971255296076	Grik3/Syt4	2
CST<WT	BP	GO:0051965	positive regulation of synapse assembly	2/127	71/13966	0.136278316815888	0.378655669215079	0.322971255296076	Adgrb3/Ntrk3	2
CST<WT	BP	GO:0070509	calcium ion import	2/127	71/13966	0.136278316815888	0.378655669215079	0.322971255296076	Cacna1e/Cacnb2	2
WT<CST	BP	GO:0002367	cytokine production involved in immune response	2/131	69/13966	0.136805946811628	0.492144947160589	0.462042197903256	Crlf2/Chga	2
WT<CST	BP	GO:0051924	regulation of calcium ion transport	4/131	211/13966	0.136866011417525	0.492144947160589	0.462042197903256	Pacsin3/Serpine1/Ramp3/Stac2	4
CST<WT	BP	GO:0050768	negative regulation of neurogenesis	5/127	299/13966	0.136935216233961	0.380042552888955	0.32415418637969	Rapgef2/Ntrk3/Sez6/Sox11/Syt4	5
WT<CST	BP	GO:0042391	regulation of membrane potential	6/131	372/13966	0.13732262529297	0.492144947160589	0.462042197903256	Bok/Bdnf/Ptn/Insyn1/Tmem108/Adcyap1	6
WT<CST	BP	GO:0019933	cAMP-mediated signaling	3/131	137/13966	0.137864971446642	0.492144947160589	0.462042197903256	Ramp3/Chga/Adcyap1	3
CST<WT	BP	GO:0072507	divalent inorganic cation homeostasis	6/127	385/13966	0.138803803168193	0.383934344705924	0.327473658371442	Atp2b4/Grin2b/Npy1r/Ank3/Slc24a4/Ryr2	6
CST<WT	BP	GO:0050796	regulation of insulin secretion	3/127	142/13966	0.13929250996065	0.383934344705924	0.327473658371442	Cacna1e/Epha5/Gpr68	3
CST<WT	BP	GO:0006821	chloride transport	2/127	72/13966	0.139377732262132	0.383934344705924	0.327473658371442	Grm5/Glra3	2
CST<WT	BP	GO:0006885	regulation of pH	2/127	72/13966	0.139377732262132	0.383934344705924	0.327473658371442	Slc4a8/Mapk1	2
CST<WT	BP	GO:0014032	neural crest cell development	2/127	72/13966	0.139377732262132	0.383934344705924	0.327473658371442	Sox11/Mapk1	2
CST<WT	BP	GO:0043200	response to amino acid	2/127	72/13966	0.139377732262132	0.383934344705924	0.327473658371442	Igf1r/Glra3	2
WT<CST	MF	GO:0004553	hydrolase activity, hydrolyzing O-glycosyl compounds	2/130	70/13889	0.139526539201846	0.427587593597767	0.390371231763589	Chil3/Gla	2
CST<WT	BP	GO:0032956	regulation of actin cytoskeleton organization	5/127	301/13966	0.139680174414594	0.383934344705924	0.327473658371442	Epha5/Met/Ntrk3/Wasf1/Wipf2	5
WT<CST	MF	GO:0004602	glutathione peroxidase activity	1/130	16/13889	0.139761640625807	0.427587593597767	0.390371231763589	Gpx1	1
WT<CST	MF	GO:0016208	AMP binding	1/130	16/13889	0.139761640625807	0.427587593597767	0.390371231763589	Hist1h1e	1
WT<CST	MF	GO:0016646	oxidoreductase activity, acting on the CH-NH group of donors, NAD or NADP as acceptor	1/130	16/13889	0.139761640625807	0.427587593597767	0.390371231763589	Mthfd1l	1
WT<CST	MF	GO:0017160	Ral GTPase binding	1/130	16/13889	0.139761640625807	0.427587593597767	0.390371231763589	Myo1c	1
WT<CST	BP	GO:0045814	negative regulation of gene expression, epigenetic	2/131	70/13966	0.140006330151073	0.492144947160589	0.462042197903256	Hist1h1e/Hist1h1c	2
WT<CST	BP	GO:0006323	DNA packaging	3/131	138/13966	0.140019482454068	0.492144947160589	0.462042197903256	Hist1h4k/Hist1h1e/Hist1h1c	3
WT<CST	BP	GO:0000188	inactivation of MAPK activity	1/131	16/13966	0.140039204750438	0.492144947160589	0.462042197903256	Dusp4	1
WT<CST	BP	GO:0007035	vacuolar acidification	1/131	16/13966	0.140039204750438	0.492144947160589	0.462042197903256	Atp6v0c	1
WT<CST	BP	GO:0008334	histone mRNA metabolic process	1/131	16/13966	0.140039204750438	0.492144947160589	0.462042197903256	Lsm11	1
WT<CST	BP	GO:0016137	glycoside metabolic process	1/131	16/13966	0.140039204750438	0.492144947160589	0.462042197903256	Gla	1
WT<CST	BP	GO:0021542	dentate gyrus development	1/131	16/13966	0.140039204750438	0.492144947160589	0.462042197903256	Tmem108	1
WT<CST	BP	GO:0030252	growth hormone secretion	1/131	16/13966	0.140039204750438	0.492144947160589	0.462042197903256	Adcyap1	1
WT<CST	BP	GO:0030878	thyroid gland development	1/131	16/13966	0.140039204750438	0.492144947160589	0.462042197903256	Rap1gap	1
WT<CST	BP	GO:0031342	negative regulation of cell killing	1/131	16/13966	0.140039204750438	0.492144947160589	0.462042197903256	H2-T23	1
WT<CST	BP	GO:0031649	heat generation	1/131	16/13966	0.140039204750438	0.492144947160589	0.462042197903256	Apln	1
WT<CST	BP	GO:0031958	corticosteroid receptor signaling pathway	1/131	16/13966	0.140039204750438	0.492144947160589	0.462042197903256	Bdnf	1
WT<CST	BP	GO:0033604	negative regulation of catecholamine secretion	1/131	16/13966	0.140039204750438	0.492144947160589	0.462042197903256	Chga	1
WT<CST	BP	GO:0034312	diol biosynthetic process	1/131	16/13966	0.140039204750438	0.492144947160589	0.462042197903256	Sphk1	1
WT<CST	BP	GO:0034367	protein-containing complex remodeling	1/131	16/13966	0.140039204750438	0.492144947160589	0.462042197903256	Lipg	1
WT<CST	BP	GO:0036037	CD8-positive, alpha-beta T cell activation	1/131	16/13966	0.140039204750438	0.492144947160589	0.462042197903256	H2-T23	1
WT<CST	BP	GO:0042447	hormone catabolic process	1/131	16/13966	0.140039204750438	0.492144947160589	0.462042197903256	Ache	1
WT<CST	BP	GO:0044321	response to leptin	1/131	16/13966	0.140039204750438	0.492144947160589	0.462042197903256	Ccnd1	1
WT<CST	BP	GO:0045954	positive regulation of natural killer cell mediated cytotoxicity	1/131	16/13966	0.140039204750438	0.492144947160589	0.462042197903256	H60b	1
WT<CST	BP	GO:0046112	nucleobase biosynthetic process	1/131	16/13966	0.140039204750438	0.492144947160589	0.462042197903256	Mthfd1l	1
WT<CST	BP	GO:0051386	regulation of neurotrophin TRK receptor signaling pathway	1/131	16/13966	0.140039204750438	0.492144947160589	0.462042197903256	Tmem108	1
WT<CST	BP	GO:0051546	keratinocyte migration	1/131	16/13966	0.140039204750438	0.492144947160589	0.462042197903256	Serpine1	1
WT<CST	BP	GO:0060219	camera-type eye photoreceptor cell differentiation	1/131	16/13966	0.140039204750438	0.492144947160589	0.462042197903256	Ptn	1
WT<CST	BP	GO:0060544	regulation of necroptotic process	1/131	16/13966	0.140039204750438	0.492144947160589	0.462042197903256	Bok	1
WT<CST	BP	GO:0090025	regulation of monocyte chemotaxis	1/131	16/13966	0.140039204750438	0.492144947160589	0.462042197903256	Serpine1	1
WT<CST	BP	GO:1900409	positive regulation of cellular response to oxidative stress	1/131	16/13966	0.140039204750438	0.492144947160589	0.462042197903256	Nox1	1
WT<CST	BP	GO:1900746	regulation of vascular endothelial growth factor signaling pathway	1/131	16/13966	0.140039204750438	0.492144947160589	0.462042197903256	Myo1c	1
WT<CST	BP	GO:1903209	positive regulation of oxidative stress-induced cell death	1/131	16/13966	0.140039204750438	0.492144947160589	0.462042197903256	Nox1	1
CST<WT	MF	GO:0005104	fibroblast growth factor receptor binding	1/123	17/13889	0.14041791225889	0.383448914245431	0.330863258844835	Fgf10	1
CST<WT	MF	GO:0005248	voltage-gated sodium channel activity	1/123	17/13889	0.14041791225889	0.383448914245431	0.330863258844835	Scn3b	1
CST<WT	MF	GO:0008353	RNA polymerase II CTD heptapeptide repeat kinase activity	1/123	17/13889	0.14041791225889	0.383448914245431	0.330863258844835	Mapk1	1
CST<WT	MF	GO:0015278	calcium-release channel activity	1/123	17/13889	0.14041791225889	0.383448914245431	0.330863258844835	Ryr2	1
CST<WT	MF	GO:0016638	oxidoreductase activity, acting on the CH-NH2 group of donors	1/123	17/13889	0.14041791225889	0.383448914245431	0.330863258844835	Crym	1
CST<WT	MF	GO:0043274	phospholipase binding	1/123	17/13889	0.14041791225889	0.383448914245431	0.330863258844835	Met	1
WT<CST	CC	GO:0031430	M band	1/134	16/14212	0.140714935284812	0.564876436029751	0.537977558123572	Ank1	1
WT<CST	CC	GO:0098890	extrinsic component of postsynaptic membrane	1/134	16/14212	0.140714935284812	0.564876436029751	0.537977558123572	Nptx2	1
WT<CST	CC	GO:0008076	voltage-gated potassium channel complex	2/134	70/14212	0.141178098415408	0.564876436029751	0.537977558123572	Kcnip3/Kcng4	2
CST<WT	BP	GO:0006909	phagocytosis	3/127	143/13966	0.141388286455565	0.383934344705924	0.327473658371442	Fcer1g/Met/Prkcg	3
CST<WT	BP	GO:0035051	cardiocyte differentiation	3/127	143/13966	0.141388286455565	0.383934344705924	0.327473658371442	Met/Mapk1/Agtr2	3
CST<WT	BP	GO:0045931	positive regulation of mitotic cell cycle	3/127	143/13966	0.141388286455565	0.383934344705924	0.327473658371442	Met/Igf1r/Fgf10	3
WT<CST	CC	GO:0009898	cytoplasmic side of plasma membrane	3/134	138/14212	0.141585615017362	0.564876436029751	0.537977558123572	Nptx2/Ank1/Stac2	3
WT<CST	BP	GO:0046942	carboxylic acid transport	4/131	214/13966	0.141936322473821	0.493059712122442	0.462901009958481	Bdnf/Slc7a10/Slc38a3/Nfkbie	4
WT<CST	BP	GO:0042445	hormone metabolic process	3/131	139/13966	0.142185440756192	0.493059712122442	0.462901009958481	Ache/Slc5a5/Crhbp	3
CST<WT	BP	GO:0007586	digestion	2/127	73/13966	0.142492524230407	0.383934344705924	0.327473658371442	Chrm3/Fgf10	2
CST<WT	BP	GO:0048708	astrocyte differentiation	2/127	73/13966	0.142492524230407	0.383934344705924	0.327473658371442	Ntrk3/Mapk1	2
CST<WT	BP	GO:0060993	kidney morphogenesis	2/127	73/13966	0.142492524230407	0.383934344705924	0.327473658371442	Fgf10/Agtr2	2
WT<CST	BP	GO:0015711	organic anion transport	5/131	294/13966	0.142848665001787	0.493059712122442	0.462901009958481	Bdnf/Slc7a10/Slc38a3/Pitpnc1/Nfkbie	5
CST<WT	CC	GO:0032838	plasma membrane bounded cell projection cytoplasm	3/129	144/14212	0.142952050479943	0.341529388918261	0.269296818607135	Grik3/Dync2h1/Mapk1	3
WT<CST	BP	GO:0051965	positive regulation of synapse assembly	2/131	71/13966	0.143222955329823	0.493059712122442	0.462901009958481	Bdnf/Srpx2	2
WT<CST	BP	GO:0070509	calcium ion import	2/131	71/13966	0.143222955329823	0.493059712122442	0.462901009958481	Serpine1/Ramp3	2
WT<CST	BP	GO:0015849	organic acid transport	4/131	215/13966	0.143643005554355	0.493059712122442	0.462901009958481	Bdnf/Slc7a10/Slc38a3/Nfkbie	4
CST<WT	CC	GO:0016010	dystrophin-associated glycoprotein complex	1/129	17/14212	0.14366918943425	0.341529388918261	0.269296818607135	Sgcz	1
CST<WT	CC	GO:0033268	node of Ranvier	1/129	17/14212	0.14366918943425	0.341529388918261	0.269296818607135	Ank3	1
CST<WT	CC	GO:0090665	glycoprotein complex	1/129	17/14212	0.14366918943425	0.341529388918261	0.269296818607135	Sgcz	1
CST<WT	BP	GO:0003071	renal system process involved in regulation of systemic arterial blood pressure	1/127	17/13966	0.143915613644437	0.383934344705924	0.327473658371442	Agtr2	1
CST<WT	BP	GO:0014072	response to isoquinoline alkaloid	1/127	17/13966	0.143915613644437	0.383934344705924	0.327473658371442	Prkcg	1
CST<WT	BP	GO:0014821	phasic smooth muscle contraction	1/127	17/13966	0.143915613644437	0.383934344705924	0.327473658371442	Npy1r	1
CST<WT	BP	GO:0021535	cell migration in hindbrain	1/127	17/13966	0.143915613644437	0.383934344705924	0.327473658371442	Rere	1
CST<WT	BP	GO:0032516	positive regulation of phosphoprotein phosphatase activity	1/127	17/13966	0.143915613644437	0.383934344705924	0.327473658371442	Agtr2	1
CST<WT	BP	GO:0032753	positive regulation of interleukin-4 production	1/127	17/13966	0.143915613644437	0.383934344705924	0.327473658371442	Fcer1g	1
CST<WT	BP	GO:0033574	response to testosterone	1/127	17/13966	0.143915613644437	0.383934344705924	0.327473658371442	Ar	1
CST<WT	BP	GO:0034643	establishment of mitochondrion localization, microtubule-mediated	1/127	17/13966	0.143915613644437	0.383934344705924	0.327473658371442	Wasf1	1
CST<WT	BP	GO:0042430	indole-containing compound metabolic process	1/127	17/13966	0.143915613644437	0.383934344705924	0.327473658371442	Htr1a	1
CST<WT	BP	GO:0045838	positive regulation of membrane potential	1/127	17/13966	0.143915613644437	0.383934344705924	0.327473658371442	Ank3	1
CST<WT	BP	GO:0047497	mitochondrion transport along microtubule	1/127	17/13966	0.143915613644437	0.383934344705924	0.327473658371442	Wasf1	1
CST<WT	BP	GO:0061213	positive regulation of mesonephros development	1/127	17/13966	0.143915613644437	0.383934344705924	0.327473658371442	Agtr2	1
CST<WT	BP	GO:0061217	regulation of mesonephros development	1/127	17/13966	0.143915613644437	0.383934344705924	0.327473658371442	Agtr2	1
CST<WT	BP	GO:0070208	protein heterotrimerization	1/127	17/13966	0.143915613644437	0.383934344705924	0.327473658371442	Gnaq	1
CST<WT	BP	GO:0070875	positive regulation of glycogen metabolic process	1/127	17/13966	0.143915613644437	0.383934344705924	0.327473658371442	Dyrk2	1
CST<WT	BP	GO:0080182	histone H3-K4 trimethylation	1/127	17/13966	0.143915613644437	0.383934344705924	0.327473658371442	Ncoa6	1
CST<WT	BP	GO:0090189	regulation of branching involved in ureteric bud morphogenesis	1/127	17/13966	0.143915613644437	0.383934344705924	0.327473658371442	Agtr2	1
CST<WT	BP	GO:0090190	positive regulation of branching involved in ureteric bud morphogenesis	1/127	17/13966	0.143915613644437	0.383934344705924	0.327473658371442	Agtr2	1
CST<WT	BP	GO:0097091	synaptic vesicle clustering	1/127	17/13966	0.143915613644437	0.383934344705924	0.327473658371442	Pclo	1
CST<WT	BP	GO:1901626	regulation of postsynaptic membrane organization	1/127	17/13966	0.143915613644437	0.383934344705924	0.327473658371442	Shisa7	1
CST<WT	BP	GO:2000010	positive regulation of protein localization to cell surface	1/127	17/13966	0.143915613644437	0.383934344705924	0.327473658371442	Fcer1g	1
CST<WT	BP	GO:2001028	positive regulation of endothelial cell chemotaxis	1/127	17/13966	0.143915613644437	0.383934344705924	0.327473658371442	Met	1
CST<WT	BP	GO:0051493	regulation of cytoskeleton organization	7/127	477/13966	0.144261747657157	0.384432024453641	0.327898150240767	Epha5/Met/Ntrk3/Wasf1/Wipf2/Htr1a/Mapk1	7
WT<CST	BP	GO:0042594	response to starvation	3/131	140/13966	0.144362675356711	0.493059712122442	0.462901009958481	Cadps2/Slc38a3/Adcyap1	3
WT<CST	BP	GO:2001236	regulation of extrinsic apoptotic signaling pathway	3/131	140/13966	0.144362675356711	0.493059712122442	0.462901009958481	Scg2/Serpine1/Gpx1	3
CST<WT	CC	GO:0031300	intrinsic component of organelle membrane	4/129	223/14212	0.145010303872754	0.341719933474054	0.269447063488961	Rnf152/Syt1/Syt4/Zdhhc9	4
CST<WT	MF	GO:0003712	transcription coregulator activity	6/123	401/13889	0.145450879621472	0.385294888343455	0.332456078600283	Cbfa2t2/Ncoa6/Runx1t1/Rere/Crym/Sox11	6
CST<WT	BP	GO:0030595	leukocyte chemotaxis	3/127	145/13966	0.145611664882686	0.386347787428654	0.329532184597554	Fcer1g/Lyst/Vegfd	3
CST<WT	BP	GO:0048469	cell maturation	3/127	145/13966	0.145611664882686	0.386347787428654	0.329532184597554	Adgrb3/Cntnap2/Gnaq	3
CST<WT	BP	GO:0042306	regulation of protein import into nucleus	2/127	74/13966	0.145622163132095	0.386347787428654	0.329532184597554	Mapk1/Agtr2	2
CST<WT	BP	GO:2000106	regulation of leukocyte apoptotic process	2/127	74/13966	0.145622163132095	0.386347787428654	0.329532184597554	Fcer1g/Rapgef2	2
WT<CST	MF	GO:0033218	amide binding	5/130	297/13889	0.146251514894609	0.443056059827786	0.404493353888083	Hcrtr1/Hcrtr2/Crhbp/H2-D1/H2-T23	5
WT<CST	BP	GO:0006885	regulation of pH	2/131	72/13966	0.146455242809346	0.493059712122442	0.462901009958481	Atp6v0c/Nox1	2
WT<CST	BP	GO:0044344	cellular response to fibroblast growth factor stimulus	2/131	72/13966	0.146455242809346	0.493059712122442	0.462901009958481	Creb3l1/Apln	2
WT<CST	BP	GO:0055072	iron ion homeostasis	2/131	72/13966	0.146455242809346	0.493059712122442	0.462901009958481	Rhd/Ank1	2
WT<CST	BP	GO:1901992	positive regulation of mitotic cell cycle phase transition	2/131	72/13966	0.146455242809346	0.493059712122442	0.462901009958481	Ccnd1/Lsm11	2
WT<CST	BP	GO:1903524	positive regulation of blood circulation	2/131	72/13966	0.146455242809346	0.493059712122442	0.462901009958481	Chga/Apln	2
WT<CST	BP	GO:0002440	production of molecular mediator of immune response	3/131	141/13966	0.146551015292868	0.493059712122442	0.462901009958481	Crlf2/Chga/H2-T23	3
WT<CST	MF	GO:0030547	receptor inhibitor activity	1/130	17/13889	0.147822693514054	0.443468080542161	0.404869513150397	Lynx1	1
CST<WT	MF	GO:0001222	transcription corepressor binding	1/123	18/13889	0.148039639247944	0.385294888343455	0.332456078600283	Pclo	1
CST<WT	MF	GO:0031434	mitogen-activated protein kinase kinase binding	1/123	18/13889	0.148039639247944	0.385294888343455	0.332456078600283	Ksr2	1
CST<WT	MF	GO:0070300	phosphatidic acid binding	1/123	18/13889	0.148039639247944	0.385294888343455	0.332456078600283	Rapgef2	1
CST<WT	MF	GO:0099095	ligand-gated anion channel activity	1/123	18/13889	0.148039639247944	0.385294888343455	0.332456078600283	Glra3	1
WT<CST	BP	GO:0001921	positive regulation of receptor recycling	1/131	17/13966	0.148114822254215	0.493059712122442	0.462901009958481	Ramp3	1
WT<CST	BP	GO:0006026	aminoglycan catabolic process	1/131	17/13966	0.148114822254215	0.493059712122442	0.462901009958481	Chil3	1
WT<CST	BP	GO:0008090	retrograde axonal transport	1/131	17/13966	0.148114822254215	0.493059712122442	0.462901009958481	Tmem108	1
WT<CST	BP	GO:0045653	negative regulation of megakaryocyte differentiation	1/131	17/13966	0.148114822254215	0.493059712122442	0.462901009958481	Hist1h4k	1
WT<CST	BP	GO:0048791	calcium ion-regulated exocytosis of neurotransmitter	1/131	17/13966	0.148114822254215	0.493059712122442	0.462901009958481	Syt2	1
WT<CST	BP	GO:0072539	T-helper 17 cell differentiation	1/131	17/13966	0.148114822254215	0.493059712122442	0.462901009958481	Irf4	1
WT<CST	BP	GO:0099171	presynaptic modulation of chemical synaptic transmission	1/131	17/13966	0.148114822254215	0.493059712122442	0.462901009958481	Syt2	1
WT<CST	BP	GO:1901028	regulation of mitochondrial outer membrane permeabilization involved in apoptotic signaling pathway	1/131	17/13966	0.148114822254215	0.493059712122442	0.462901009958481	Bok	1
WT<CST	BP	GO:1901626	regulation of postsynaptic membrane organization	1/131	17/13966	0.148114822254215	0.493059712122442	0.462901009958481	Ptn	1
WT<CST	BP	GO:1902176	negative regulation of oxidative stress-induced intrinsic apoptotic signaling pathway	1/131	17/13966	0.148114822254215	0.493059712122442	0.462901009958481	Gpx1	1
WT<CST	BP	GO:1902236	negative regulation of endoplasmic reticulum stress-induced intrinsic apoptotic signaling pathway	1/131	17/13966	0.148114822254215	0.493059712122442	0.462901009958481	Creb3l1	1
WT<CST	BP	GO:1902547	regulation of cellular response to vascular endothelial growth factor stimulus	1/131	17/13966	0.148114822254215	0.493059712122442	0.462901009958481	Myo1c	1
CST<WT	CC	GO:0070382	exocytic vesicle	4/129	225/14212	0.148348652275739	0.346573144540735	0.273273833139519	Grin2b/Npy1r/Syt1/Syt4	4
CST<WT	MF	GO:0008135	translation factor activity, RNA binding	2/123	77/13889	0.148732685382281	0.385294888343455	0.332456078600283	Cpeb2/Sox11	2
CST<WT	BP	GO:0021761	limbic system development	2/127	75/13966	0.148766127597902	0.387971535587124	0.330917147305528	Epha5/Cntnap2	2
CST<WT	BP	GO:0071466	cellular response to xenobiotic stimulus	2/127	75/13966	0.148766127597902	0.387971535587124	0.330917147305528	Ryr2/Agtr2	2
CST<WT	BP	GO:1901379	regulation of potassium ion transmembrane transport	2/127	75/13966	0.148766127597902	0.387971535587124	0.330917147305528	Ank3/Fhl1	2
CST<WT	BP	GO:0006260	DNA replication	4/127	225/13966	0.149018006124904	0.387971535587124	0.330917147305528	Met/Rny3/Rny1/Fgf10	4
WT<CST	BP	GO:0060968	regulation of gene silencing	2/131	73/13966	0.149702622340084	0.493059712122442	0.462901009958481	Hist1h1e/Hist1h1c	2
CST<WT	BP	GO:0001659	temperature homeostasis	3/127	147/13966	0.149876439575318	0.387971535587124	0.330917147305528	Ksr2/Nova2/Igf1r	3
CST<WT	MF	GO:0016758	transferase activity, transferring hexosyl groups	3/123	151/13889	0.149985520161108	0.385294888343455	0.332456078600283	B3galt1/Ndst3/Mgat4c	3
WT<CST	BP	GO:0050768	negative regulation of neurogenesis	5/131	299/13966	0.150108492073813	0.493059712122442	0.462901009958481	Bdnf/Rap1gap/Ptn/H2-D1/Adcyap1	5
WT<CST	CC	GO:0016528	sarcoplasm	2/134	73/14212	0.150941880339107	0.564876436029751	0.537977558123572	Rtn2/Ank1	2
WT<CST	CC	GO:0060076	excitatory synapse	2/134	73/14212	0.150941880339107	0.564876436029751	0.537977558123572	Cadps2/Srpx2	2
WT<CST	BP	GO:0045931	positive regulation of mitotic cell cycle	3/131	143/13966	0.150960327689699	0.493059712122442	0.462901009958481	Ccnd1/Lsm11/Sphk1	3
CST<WT	CC	GO:0097228	sperm principal piece	1/129	18/14212	0.151451272883562	0.350797392747396	0.276604663925894	Atp2b4	1
CST<WT	BP	GO:0001976	neurological system process involved in regulation of systemic arterial blood pressure	1/127	18/13966	0.151709915534691	0.387971535587124	0.330917147305528	Agtr2	1
CST<WT	BP	GO:0002438	acute inflammatory response to antigenic stimulus	1/127	18/13966	0.151709915534691	0.387971535587124	0.330917147305528	Fcer1g	1
CST<WT	BP	GO:0002446	neutrophil mediated immunity	1/127	18/13966	0.151709915534691	0.387971535587124	0.330917147305528	Lyst	1
CST<WT	BP	GO:0007205	protein kinase C-activating G protein-coupled receptor signaling pathway	1/127	18/13966	0.151709915534691	0.387971535587124	0.330917147305528	Grm5	1
CST<WT	BP	GO:0010738	regulation of protein kinase A signaling	1/127	18/13966	0.151709915534691	0.387971535587124	0.330917147305528	Grin2b	1
CST<WT	BP	GO:0010863	positive regulation of phospholipase C activity	1/127	18/13966	0.151709915534691	0.387971535587124	0.330917147305528	Gnaq	1
CST<WT	BP	GO:0032104	regulation of response to extracellular stimulus	1/127	18/13966	0.151709915534691	0.387971535587124	0.330917147305528	Prkcg	1
CST<WT	BP	GO:0032107	regulation of response to nutrient levels	1/127	18/13966	0.151709915534691	0.387971535587124	0.330917147305528	Prkcg	1
CST<WT	BP	GO:0032148	activation of protein kinase B activity	1/127	18/13966	0.151709915534691	0.387971535587124	0.330917147305528	Ntrk3	1
CST<WT	BP	GO:0032352	positive regulation of hormone metabolic process	1/127	18/13966	0.151709915534691	0.387971535587124	0.330917147305528	Igf1r	1
CST<WT	BP	GO:0032703	negative regulation of interleukin-2 production	1/127	18/13966	0.151709915534691	0.387971535587124	0.330917147305528	Cd34	1
CST<WT	BP	GO:0032770	positive regulation of monooxygenase activity	1/127	18/13966	0.151709915534691	0.387971535587124	0.330917147305528	Agtr2	1
CST<WT	BP	GO:0033605	positive regulation of catecholamine secretion	1/127	18/13966	0.151709915534691	0.387971535587124	0.330917147305528	Chrna4	1
CST<WT	BP	GO:0035813	regulation of renal sodium excretion	1/127	18/13966	0.151709915534691	0.387971535587124	0.330917147305528	Agtr2	1
CST<WT	BP	GO:0042053	regulation of dopamine metabolic process	1/127	18/13966	0.151709915534691	0.387971535587124	0.330917147305528	Htr1a	1
CST<WT	BP	GO:0044550	secondary metabolite biosynthetic process	1/127	18/13966	0.151709915534691	0.387971535587124	0.330917147305528	Rapgef2	1
CST<WT	BP	GO:0048268	clathrin coat assembly	1/127	18/13966	0.151709915534691	0.387971535587124	0.330917147305528	Nsg2	1
CST<WT	BP	GO:0050774	negative regulation of dendrite morphogenesis	1/127	18/13966	0.151709915534691	0.387971535587124	0.330917147305528	Rapgef2	1
CST<WT	BP	GO:0060602	branch elongation of an epithelium	1/127	18/13966	0.151709915534691	0.387971535587124	0.330917147305528	Fgf10	1
CST<WT	BP	GO:0071549	cellular response to dexamethasone stimulus	1/127	18/13966	0.151709915534691	0.387971535587124	0.330917147305528	Agtr2	1
CST<WT	BP	GO:0099150	regulation of postsynaptic specialization assembly	1/127	18/13966	0.151709915534691	0.387971535587124	0.330917147305528	Ntrk3	1
CST<WT	BP	GO:0150052	regulation of postsynapse assembly	1/127	18/13966	0.151709915534691	0.387971535587124	0.330917147305528	Ntrk3	1
CST<WT	BP	GO:1901017	negative regulation of potassium ion transmembrane transporter activity	1/127	18/13966	0.151709915534691	0.387971535587124	0.330917147305528	Ank3	1
CST<WT	BP	GO:1903010	regulation of bone development	1/127	18/13966	0.151709915534691	0.387971535587124	0.330917147305528	Gpr68	1
CST<WT	BP	GO:1904385	cellular response to angiotensin	1/127	18/13966	0.151709915534691	0.387971535587124	0.330917147305528	Igf1r	1
CST<WT	BP	GO:1904424	regulation of GTP binding	1/127	18/13966	0.151709915534691	0.387971535587124	0.330917147305528	Met	1
CST<WT	BP	GO:1990776	response to angiotensin	1/127	18/13966	0.151709915534691	0.387971535587124	0.330917147305528	Igf1r	1
CST<WT	BP	GO:2000641	regulation of early endosome to late endosome transport	1/127	18/13966	0.151709915534691	0.387971535587124	0.330917147305528	Mapk1	1
CST<WT	BP	GO:2000831	regulation of steroid hormone secretion	1/127	18/13966	0.151709915534691	0.387971535587124	0.330917147305528	Agtr2	1
CST<WT	MF	GO:0072341	modified amino acid binding	2/123	78/13889	0.151807420793071	0.385294888343455	0.332456078600283	Syt1/Syt4	2
CST<WT	BP	GO:0008593	regulation of Notch signaling pathway	2/127	76/13966	0.151923904374156	0.388106771619662	0.331032495773122	Cbfa2t2/Fgf10	2
WT<CST	BP	GO:0050878	regulation of body fluid levels	4/131	220/13966	0.152297401770505	0.493059712122442	0.462901009958481	Serpine1/Ccnd1/Plau/Apln	4
WT<CST	BP	GO:0061448	connective tissue development	4/131	220/13966	0.152297401770505	0.493059712122442	0.462901009958481	Ecm1/Col27a1/Vwa1/Col11a2	4
CST<WT	MF	GO:0000978	RNA polymerase II proximal promoter sequence-specific DNA binding	6/123	407/13889	0.152716886748756	0.385294888343455	0.332456078600283	Foxp2/Rfx7/Sox11/Etv1/Ssbp2/Ar	6
WT<CST	BP	GO:0002526	acute inflammatory response	2/131	74/13966	0.152964532840434	0.493059712122442	0.462901009958481	Serpina3n/Adcyap1	2
WT<CST	BP	GO:0071774	response to fibroblast growth factor	2/131	74/13966	0.152964532840434	0.493059712122442	0.462901009958481	Creb3l1/Apln	2
CST<WT	MF	GO:0001228	DNA-binding transcription activator activity, RNA polymerase II-specific	5/123	319/13889	0.153236123461532	0.385294888343455	0.332456078600283	Hlf/Sox11/Etv1/Ssbp2/Ar	5
WT<CST	BP	GO:0072507	divalent inorganic cation homeostasis	6/131	385/13966	0.153802725238252	0.493059712122442	0.462901009958481	Bok/Hcrtr1/Hcrtr2/Ramp3/Chga/Adcyap1	6
CST<WT	BP	GO:0043524	negative regulation of neuron apoptotic process	3/127	149/13966	0.154181366461662	0.391914328068055	0.334280119896373	Chl1/Prkcg/Faim2	3
CST<WT	CC	GO:0036126	sperm flagellum	2/129	77/14212	0.154652013942297	0.355175387952224	0.280056724623428	Atp2b4/Met	2
CST<WT	BP	GO:0003073	regulation of systemic arterial blood pressure	2/127	77/13966	0.15509498822029	0.391914328068055	0.334280119896373	Agtr2/Ar	2
CST<WT	BP	GO:0014031	mesenchymal cell development	2/127	77/13966	0.15509498822029	0.391914328068055	0.334280119896373	Sox11/Mapk1	2
CST<WT	MF	GO:0031683	G-protein beta/gamma-subunit complex binding	1/123	19/13889	0.155594330645284	0.385294888343455	0.332456078600283	Gnaq	1
CST<WT	MF	GO:0034593	phosphatidylinositol bisphosphate phosphatase activity	1/123	19/13889	0.155594330645284	0.385294888343455	0.332456078600283	Inpp4a	1
CST<WT	MF	GO:0140103	catalytic activity, acting on a glycoprotein	1/123	19/13889	0.155594330645284	0.385294888343455	0.332456078600283	Mgat4c	1
WT<CST	MF	GO:0031490	chromatin DNA binding	2/130	75/13889	0.155714545396958	0.445786243651927	0.406985908018111	Hist1h1e/Hist1h1c	2
WT<CST	MF	GO:1990782	protein tyrosine kinase binding	2/130	75/13889	0.155714545396958	0.445786243651927	0.406985908018111	Alkal2/Dok2	2
WT<CST	MF	GO:0008307	structural constituent of muscle	1/130	18/13889	0.155808784189023	0.445786243651927	0.406985908018111	Pdlim3	1
WT<CST	MF	GO:0042975	peroxisome proliferator activated receptor binding	1/130	18/13889	0.155808784189023	0.445786243651927	0.406985908018111	Hmga1	1
WT<CST	MF	GO:0046961	proton-transporting ATPase activity, rotational mechanism	1/130	18/13889	0.155808784189023	0.445786243651927	0.406985908018111	Atp6v0c	1
WT<CST	BP	GO:0019221	cytokine-mediated signaling pathway	4/131	222/13966	0.155814203278543	0.493059712122442	0.462901009958481	Stat4/Ecm1/Crlf2/Sphk1	4
WT<CST	BP	GO:0002438	acute inflammatory response to antigenic stimulus	1/131	18/13966	0.156115177712291	0.493059712122442	0.462901009958481	Adcyap1	1
WT<CST	BP	GO:0006953	acute-phase response	1/131	18/13966	0.156115177712291	0.493059712122442	0.462901009958481	Serpina3n	1
WT<CST	BP	GO:0007190	activation of adenylate cyclase activity	1/131	18/13966	0.156115177712291	0.493059712122442	0.462901009958481	Adcyap1	1
WT<CST	BP	GO:0010738	regulation of protein kinase A signaling	1/131	18/13966	0.156115177712291	0.493059712122442	0.462901009958481	Ramp3	1
WT<CST	BP	GO:0019731	antibacterial humoral response	1/131	18/13966	0.156115177712291	0.493059712122442	0.462901009958481	H2-T23	1
WT<CST	BP	GO:0030194	positive regulation of blood coagulation	1/131	18/13966	0.156115177712291	0.493059712122442	0.462901009958481	Serpine1	1
WT<CST	BP	GO:0030728	ovulation	1/131	18/13966	0.156115177712291	0.493059712122442	0.462901009958481	Plau	1
WT<CST	BP	GO:0031571	mitotic G1 DNA damage checkpoint	1/131	18/13966	0.156115177712291	0.493059712122442	0.462901009958481	Ccnd1	1
WT<CST	BP	GO:0033194	response to hydroperoxide	1/131	18/13966	0.156115177712291	0.493059712122442	0.462901009958481	Gpx1	1
WT<CST	BP	GO:0045737	positive regulation of cyclin-dependent protein serine/threonine kinase activity	1/131	18/13966	0.156115177712291	0.493059712122442	0.462901009958481	Ccnd1	1
WT<CST	BP	GO:0048172	regulation of short-term neuronal synaptic plasticity	1/131	18/13966	0.156115177712291	0.493059712122442	0.462901009958481	Bdnf	1
WT<CST	BP	GO:0060547	negative regulation of necrotic cell death	1/131	18/13966	0.156115177712291	0.493059712122442	0.462901009958481	Bok	1
WT<CST	BP	GO:0070168	negative regulation of biomineral tissue development	1/131	18/13966	0.156115177712291	0.493059712122442	0.462901009958481	Ecm1	1
WT<CST	BP	GO:0090201	negative regulation of release of cytochrome c from mitochondria	1/131	18/13966	0.156115177712291	0.493059712122442	0.462901009958481	Gpx1	1
WT<CST	BP	GO:1900048	positive regulation of hemostasis	1/131	18/13966	0.156115177712291	0.493059712122442	0.462901009958481	Serpine1	1
WT<CST	BP	GO:1900078	positive regulation of cellular response to insulin stimulus	1/131	18/13966	0.156115177712291	0.493059712122442	0.462901009958481	Myo1c	1
WT<CST	BP	GO:1900101	regulation of endoplasmic reticulum unfolded protein response	1/131	18/13966	0.156115177712291	0.493059712122442	0.462901009958481	Bok	1
WT<CST	BP	GO:1900120	regulation of receptor binding	1/131	18/13966	0.156115177712291	0.493059712122442	0.462901009958481	Bdnf	1
WT<CST	BP	GO:1902884	positive regulation of response to oxidative stress	1/131	18/13966	0.156115177712291	0.493059712122442	0.462901009958481	Nox1	1
WT<CST	BP	GO:1904424	regulation of GTP binding	1/131	18/13966	0.156115177712291	0.493059712122442	0.462901009958481	Rap1gap	1
WT<CST	BP	GO:0019882	antigen processing and presentation	2/131	75/13966	0.156240422277153	0.493059712122442	0.462901009958481	H2-D1/H2-T23	2
CST<WT	MF	GO:0015291	secondary active transmembrane transporter activity	3/123	154/13889	0.156288630764669	0.385294888343455	0.332456078600283	Slc24a4/Slc38a2/Slc4a8	3
WT<CST	CC	GO:0097060	synaptic membrane	7/134	471/14212	0.157171272335804	0.564876436029751	0.537977558123572	Ache/Nptx2/Cadps2/Ank1/Insyn1/Tmem108/Srpx2	7
WT<CST	BP	GO:0001819	positive regulation of cytokine production	5/131	304/13966	0.157522624536426	0.493059712122442	0.462901009958481	Crlf2/Serpine1/Irf4/H2-T23/Adcyap1	5
CST<WT	BP	GO:0050900	leukocyte migration	4/127	230/13966	0.157524042361195	0.391914328068055	0.334280119896373	Fcer1g/Cd34/Lyst/Vegfd	4
WT<CST	BP	GO:0051262	protein tetramerization	3/131	146/13966	0.157653317829479	0.493059712122442	0.462901009958481	Ache/Vasp/Hist1h4k	3
CST<WT	BP	GO:0008589	regulation of smoothened signaling pathway	2/127	78/13966	0.158278881807491	0.391914328068055	0.334280119896373	Dync2h1/Fgf10	2
CST<WT	BP	GO:0014033	neural crest cell differentiation	2/127	78/13966	0.158278881807491	0.391914328068055	0.334280119896373	Sox11/Mapk1	2
CST<WT	BP	GO:0048864	stem cell development	2/127	78/13966	0.158278881807491	0.391914328068055	0.334280119896373	Sox11/Mapk1	2
CST<WT	BP	GO:1901888	regulation of cell junction assembly	2/127	78/13966	0.158278881807491	0.391914328068055	0.334280119896373	Rapgef2/Peak1	2
CST<WT	BP	GO:1903426	regulation of reactive oxygen species biosynthetic process	2/127	78/13966	0.158278881807491	0.391914328068055	0.334280119896373	Atp2b4/Cd34	2
CST<WT	BP	GO:1904589	regulation of protein import	2/127	78/13966	0.158278881807491	0.391914328068055	0.334280119896373	Mapk1/Agtr2	2
WT<CST	BP	GO:0001817	regulation of cytokine production	7/131	475/13966	0.158937472301555	0.493059712122442	0.462901009958481	Crlf2/Serpine1/Anxa4/Sphk1/Irf4/H2-T23/Adcyap1	7
CST<WT	BP	GO:0002474	antigen processing and presentation of peptide antigen via MHC class I	1/127	19/13966	0.159433807184182	0.391914328068055	0.334280119896373	Fcer1g	1
[truncated: 3,537 more rows]
